# Supplementary material for: Lecanicilliums A–F, Thiodiketopiperazine-Class Alkaloids from a Mangrove Sediment-Derived Fungus Lecanicillium kalimantanense
Source: MDPI journal article supplement (doi:10.3390/md21110575), 2023-10-31

# Lecanicilliums A–F, Thiodiketopiperazine-Class Alkaloids from a Mangrove Sediment-Derived Fungus

## *Lecanicillium kalimantanense*

Lin-Fang Zhong <sup>1,2</sup>, Juan Ling <sup>1</sup>, Lian-Xiang Luo <sup>3</sup>, Chang-Nian Yang <sup>3</sup>, Xiao Liang <sup>1</sup> and Shu-Hua Qi <sup>1,\*</sup>

<sup>1</sup> CAS Key Laboratory of Tropical Marine Bio-Resources and Ecology, Guangdong Key Laboratory of Marine

Materia Medica, South China Sea Institute of Oceanology, Chinese Academy of Sciences, Guangzhou 510301, China; 18851107875@163.com (L.-F.Z.); lingjuan@scsio.ac.cn (J.L.); liangxiao@scsio.ac.cn (X.L.)

<sup>2</sup> University of Chinese Academy of Sciences, Beijing 100049, China

<sup>3</sup> The Marine Biomedical Research Institute, Guangdong Medical University, Zhanjiang 524023, China; luolixiang321@gdmu.edu.cn (L.-X.L.); nicholasyeung@gdmu.edu.cn (C.-N.Y.)

\* Correspondence: shuhuaqi@scsio.ac.cn; Tel.: +86-208-9022-112; Fax: +86-208-4458-964

## CONTENT

|                                                                                                         |    |
|---------------------------------------------------------------------------------------------------------|----|
| <b>Figure S1</b> $^1\text{H}$ NMR spectrum of compound <b>1</b> in $\text{DMSO-}d_6$ .....              | 4  |
| <b>Figure S2</b> $^{13}\text{C}$ NMR spectrum of compound <b>1</b> in $\text{DMSO-}d_6$ .....           | 5  |
| <b>Figure S3</b> $^1\text{H-}^1\text{H}$ COSY spectrum of compound <b>1</b> in $\text{DMSO-}d_6$ .....  | 5  |
| <b>Figure S4</b> HSQC spectrum of compound <b>1</b> in $\text{DMSO-}d_6$ .....                          | 6  |
| <b>Figure S5</b> HMBC spectrum of compound <b>1</b> in $\text{DMSO-}d_6$ .....                          | 7  |
| <b>Figure S6</b> NOESY spectrum of compound <b>1</b> in $\text{DMSO-}d_6$ .....                         | 8  |
| <b>Figure S7</b> HR-ESIMS spectrum of compound <b>1</b> .....                                           | 8  |
| <b>Figure S8</b> IR spectrum of compound <b>1</b> .....                                                 | 9  |
| <b>Figure S9</b> UV spectrum of compound <b>1</b> .....                                                 | 10 |
| <b>Figure S10</b> $^1\text{H}$ NMR spectrum of compound <b>2</b> in $\text{DMSO-}d_6$ .....             | 11 |
| <b>Figure S11</b> $^{13}\text{C}$ NMR spectrum of compound <b>2</b> in $\text{DMSO-}d_6$ .....          | 11 |
| <b>Figure S12</b> $^1\text{H-}^1\text{H}$ COSY spectrum of compound <b>2</b> in $\text{DMSO-}d_6$ ..... | 12 |
| <b>Figure S13</b> HSQC spectrum of compound <b>2</b> in $\text{DMSO-}d_6$ .....                         | 12 |
| <b>Figure S14</b> HMBC spectrum of compound <b>2</b> in $\text{DMSO-}d_6$ .....                         | 13 |
| <b>Figure S15</b> NOESY spectrum of compound <b>2</b> in $\text{DMSO-}d_6$ .....                        | 14 |
| <b>Figure S16</b> HR-ESIMS spectrum of compound <b>2</b> .....                                          | 15 |
| <b>Figure S17</b> IR spectrum of compound <b>2</b> .....                                                | 15 |
| <b>Figure S18</b> UV spectrum of compound <b>2</b> .....                                                | 16 |

|                                                                                                         |    |
|---------------------------------------------------------------------------------------------------------|----|
| <b>Figure S19</b> $^1\text{H}$ NMR spectrum of compound <b>3</b> in $\text{DMSO-}d_6$ .....             | 17 |
| <b>Figure S20</b> $^{13}\text{C}$ NMR spectrum of compound <b>3</b> in $\text{DMSO-}d_6$ .....          | 18 |
| <b>Figure S21</b> $^1\text{H-}^1\text{H}$ COSY spectrum of compound <b>3</b> in $\text{DMSO-}d_6$ ..... | 18 |
| <b>Figure S22</b> HSQC spectrum of compound <b>3</b> in $\text{DMSO-}d_6$ .....                         | 19 |
| <b>Figure S23</b> HMBC spectrum of compound <b>3</b> in $\text{DMSO-}d_6$ .....                         | 20 |
| <b>Figure S24</b> NOESY spectrum of compound <b>3</b> in $\text{DMSO-}d_6$ .....                        | 21 |
| <b>Figure S25</b> HR-ESIMS spectrum of compound <b>3</b> .....                                          | 21 |
| <b>Figure S26</b> IR spectrum of compound <b>3</b> .....                                                | 22 |
| <b>Figure S27</b> UV spectrum of compound <b>3</b> .....                                                | 23 |
| <b>Figure S28</b> $^1\text{H}$ NMR spectrum of compound <b>4</b> in $\text{DMSO-}d_6$ .....             | 24 |
| <b>Figure S29</b> $^{13}\text{C}$ NMR spectrum of compound <b>4</b> in $\text{DMSO-}d_6$ .....          | 24 |
| <b>Figure S30</b> $^1\text{H-}^1\text{H}$ COSY spectrum of compound <b>4</b> in $\text{DMSO-}d_6$ ..... | 25 |
| <b>Figure S31</b> HSQC spectrum of compound <b>4</b> in $\text{DMSO-}d_6$ .....                         | 25 |
| <b>Figure S32</b> HMBC spectrum of compound <b>4</b> in $\text{DMSO-}d_6$ .....                         | 26 |
| <b>Figure S33</b> NOESY spectrum of compound <b>4</b> in $\text{DMSO-}d_6$ .....                        | 27 |
| <b>Figure S34</b> HR-ESIMS spectrum of compound <b>4</b> .....                                          | 27 |
| <b>Figure S35</b> IR spectrum of compound <b>4</b> .....                                                | 28 |
| <b>Figure S36</b> UV spectrum of compound <b>4</b> .....                                                | 40 |
| <b>Figure S37</b> $^1\text{H}$ NMR spectrum of compound <b>5</b> in $\text{DMSO-}d_6$ .....             | 30 |
| <b>Figure S38</b> $^{13}\text{C}$ NMR spectrum of compound <b>5</b> in $\text{DMSO-}d_6$ .....          | 30 |
| <b>Figure S39</b> $^1\text{H-}^1\text{H}$ COSY spectrum of compound <b>5</b> in $\text{DMSO-}d_6$ ..... | 31 |
| <b>Figure S40</b> HSQC spectrum of compound <b>5</b> in $\text{DMSO-}d_6$ .....                         | 31 |
| <b>Figure S41</b> HMBC spectrum of compound <b>5</b> in $\text{DMSO-}d_6$ .....                         | 32 |
| <b>Figure S42</b> NOESY spectrum of compound <b>5</b> in $\text{DMSO-}d_6$ .....                        | 33 |
| <b>Figure S43</b> HR-ESIMS spectrum of compound <b>5</b> .....                                          | 33 |
| <b>Figure S44</b> IR spectrum of compound <b>5</b> .....                                                | 34 |
| <b>Figure S45</b> UV spectrum of compound <b>5</b> .....                                                | 35 |
| <b>Figure S46</b> $^1\text{H}$ NMR spectrum of compound <b>6</b> in $\text{DMSO-}d_6$ .....             | 36 |
| <b>Figure S47</b> $^{13}\text{C}$ NMR spectrum of compound <b>6</b> in $\text{DMSO-}d_6$ .....          | 36 |
| <b>Figure S48</b> $^1\text{H-}^1\text{H}$ COSY spectrum of compound <b>6</b> in $\text{DMSO-}d_6$ ..... | 37 |
| <b>Figure S49</b> HSQC spectrum of compound <b>6</b> in $\text{DMSO-}d_6$ .....                         | 37 |
| <b>Figure S50</b> HMBC spectrum of compound <b>6</b> in $\text{DMSO-}d_6$ .....                         | 38 |
| <b>Figure S51</b> NOESY spectrum of compound <b>6</b> in $\text{DMSO-}d_6$ .....                        | 39 |
| <b>Figure S52</b> HR-ESIMS spectrum of compound <b>6</b> .....                                          | 40 |
| <b>Figure S53</b> IR spectrum of compound <b>6</b> .....                                                | 41 |
| <b>Figure S54</b> UV spectrum of compound <b>6</b> .....                                                | 42 |
| <b>Figure S55</b> X-ray crystallographic structure of compound <b>3</b> .....                           | 43 |
| <b>Table S1</b> Crystal Data and Structure Refinement for Compound <b>3</b> .....                       | 43 |

|                                                                                                                                                                                                         |    |
|---------------------------------------------------------------------------------------------------------------------------------------------------------------------------------------------------------|----|
| <b>Table S2</b> Relative thermal energies ( $\Delta E$ ), relative free energies ( $\Delta G$ ), and equilibrium populations (P) of low-energy conformers of structures <b>1-6</b> in MeOH or MeCN..... | 44 |
| <b>Figure S56</b> Conformations of low-energy conformers of structure <b>1</b> in MeOH.....                                                                                                             | 45 |
| <b>Figure S57</b> Conformations of low-energy conformers of structure <b>2</b> in MeOH.....                                                                                                             | 45 |
| <b>Figure S58</b> Conformations of low-energy conformers of structure <b>3</b> in CH <sub>3</sub> CN .....                                                                                              | 46 |
| <b>Figure S59</b> Conformations of low-energy conformers of structure <b>4</b> in MeOH.....                                                                                                             | 47 |
| <b>Figure S60</b> Conformations of low-energy conformers of structure <b>5</b> in MeOH.....                                                                                                             | 48 |
| <b>Figure S61</b> Conformations of low-energy conformers of structure <b>6</b> in MeOH.....                                                                                                             | 49 |
| <b>Figure S62</b> CD spectrum of <b>3</b> in CH <sub>3</sub> CN.....                                                                                                                                    | 49 |
| <b>Figure S63</b> CD spectra of <b>1, 2, 4-6</b> in MeOH .....                                                                                                                                          | 50 |
| <b>Figure S64</b> Key HMBC and COSY correlations of compounds <b>5-6</b> .....                                                                                                                          | 50 |
| <b>Figure S65</b> Key NOESY correlations of compounds <b>5-6</b> .....                                                                                                                                  | 50 |
| <b>Figure S66</b> The proposed biosynthetic pathway for compound <b>1</b> .....                                                                                                                         | 51 |

**Figure S1** <sup>1</sup>H NMR spectrum of compound **1** in DMSO-*d*<sub>6</sub>

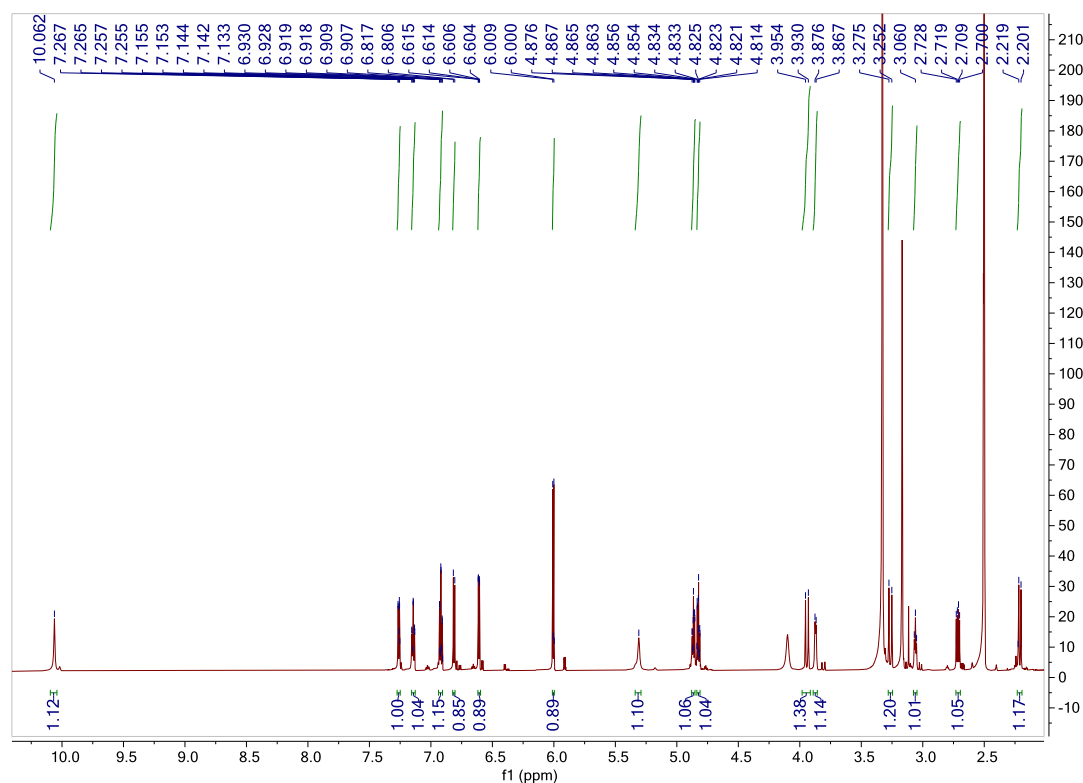



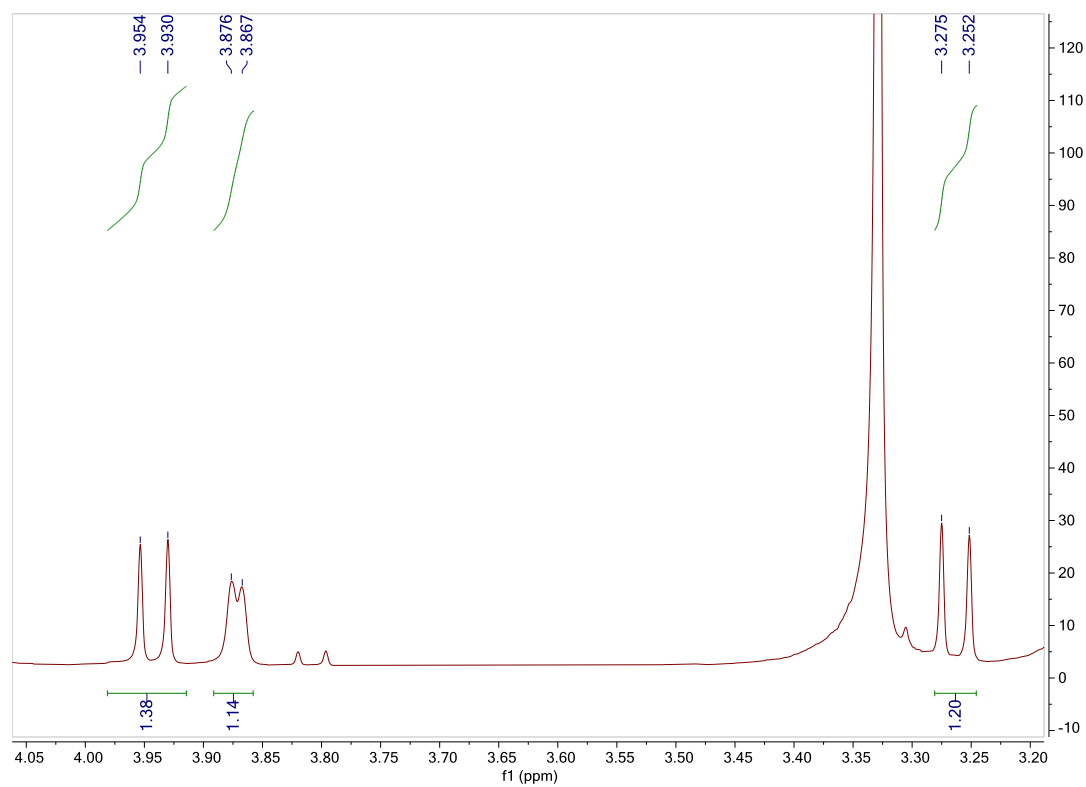

**Figure S2** <sup>13</sup>C NMR spectrum of compound **1** in DMSO-*d*<sub>6</sub>

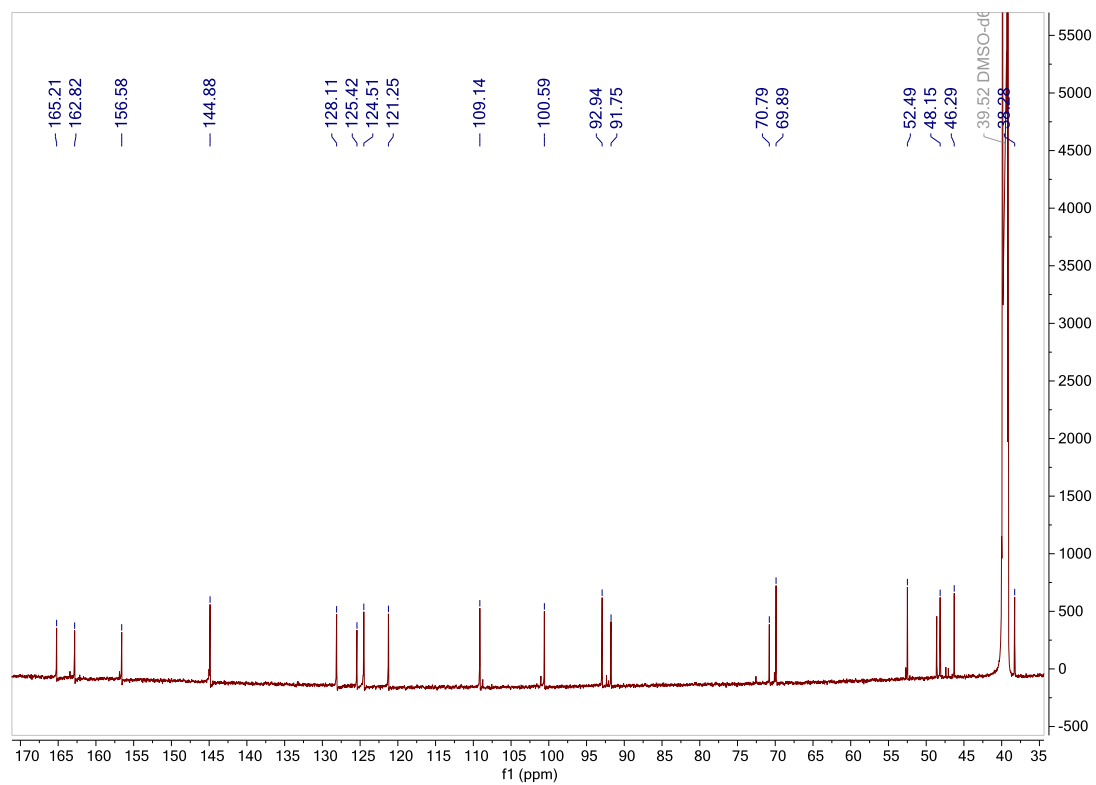

**Figure S3**  $^1\text{H}$ - $^1\text{H}$  COSY spectrum of compound **1** in  $\text{DMSO-}d_6$

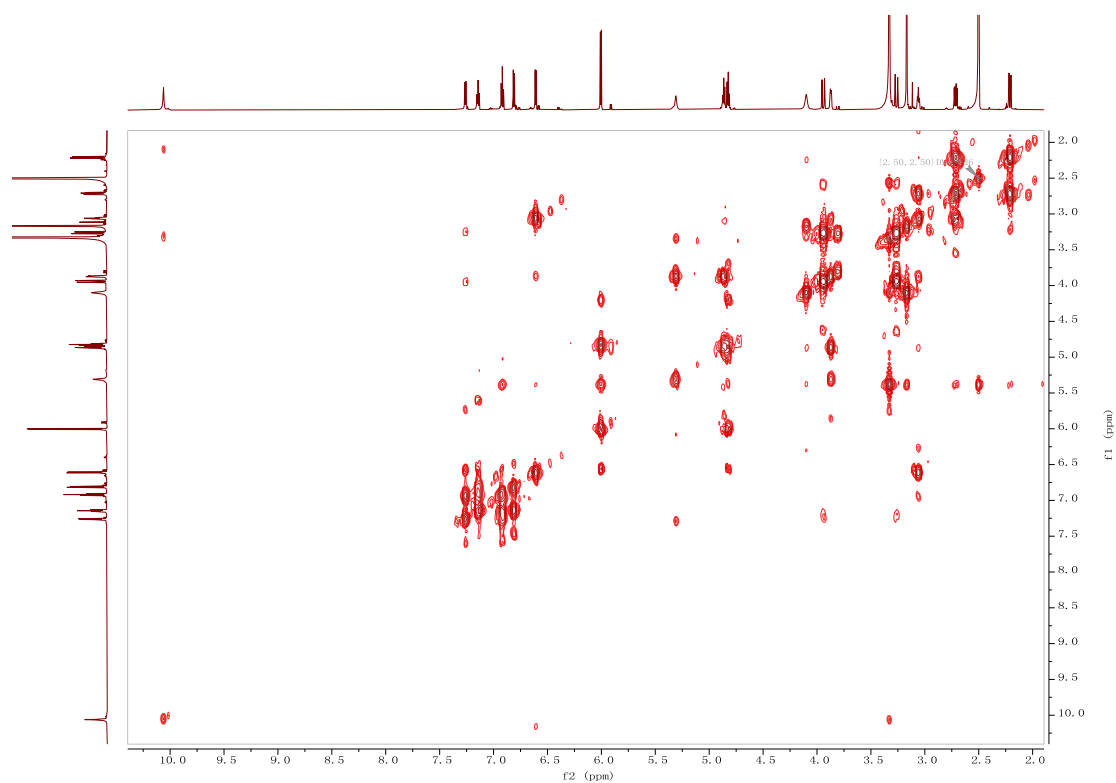

**Figure S4** HSQC spectrum of compound **1** in  $\text{DMSO-}d_6$

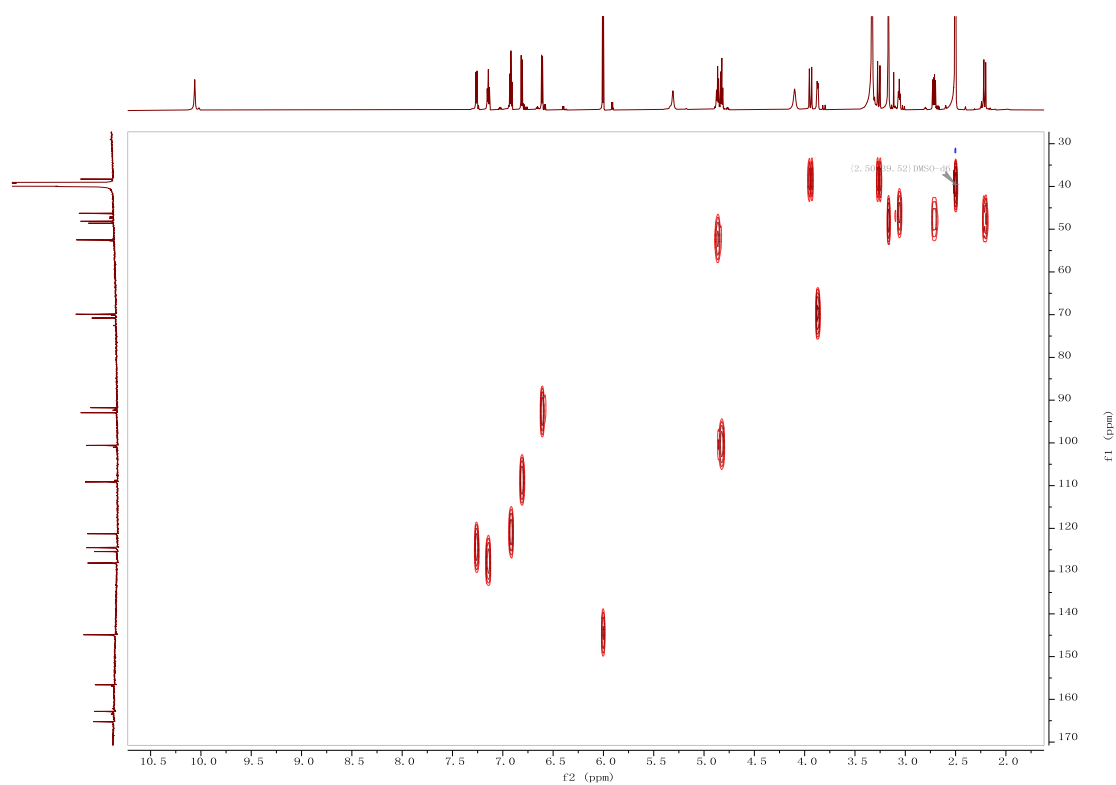

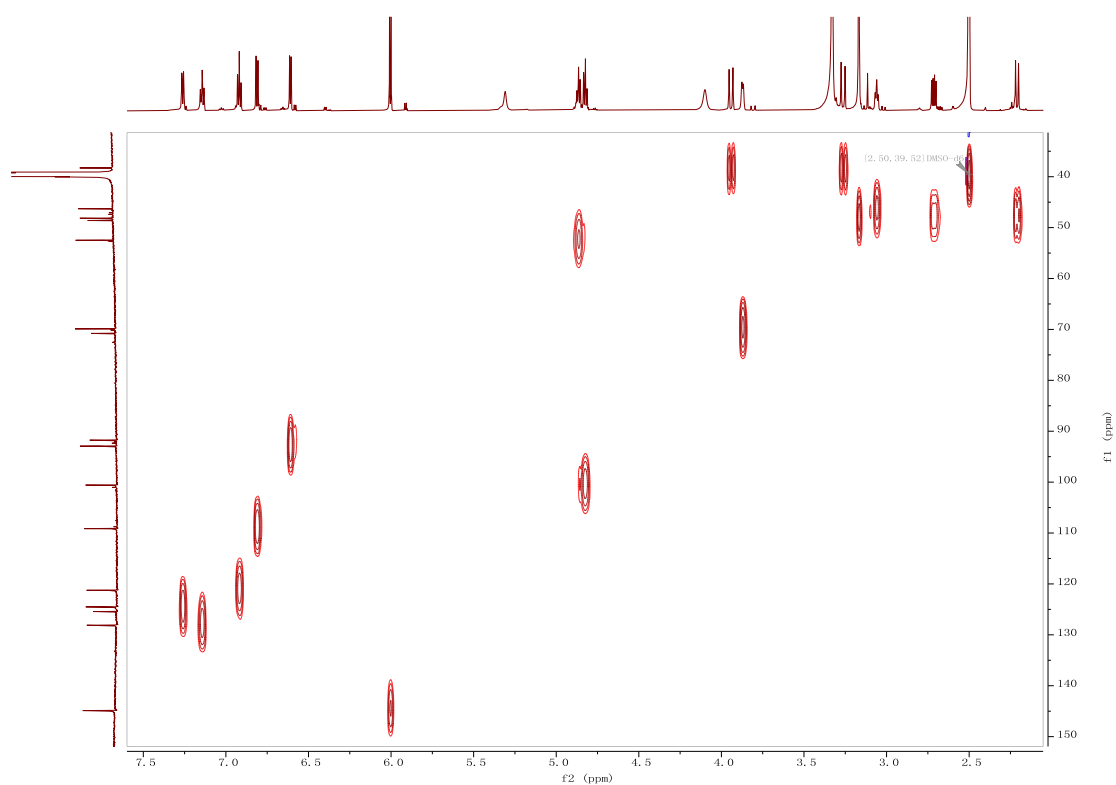

**Figure S5** HMBC spectrum of compound **1** in DMSO- $d_6$

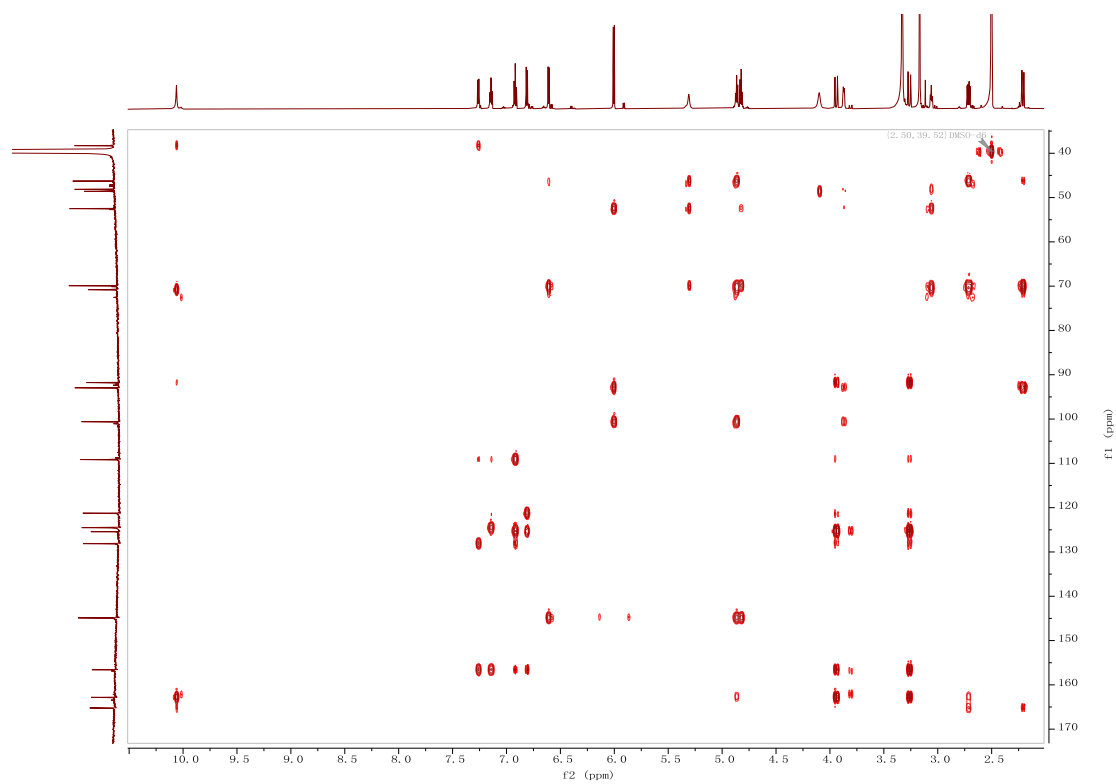

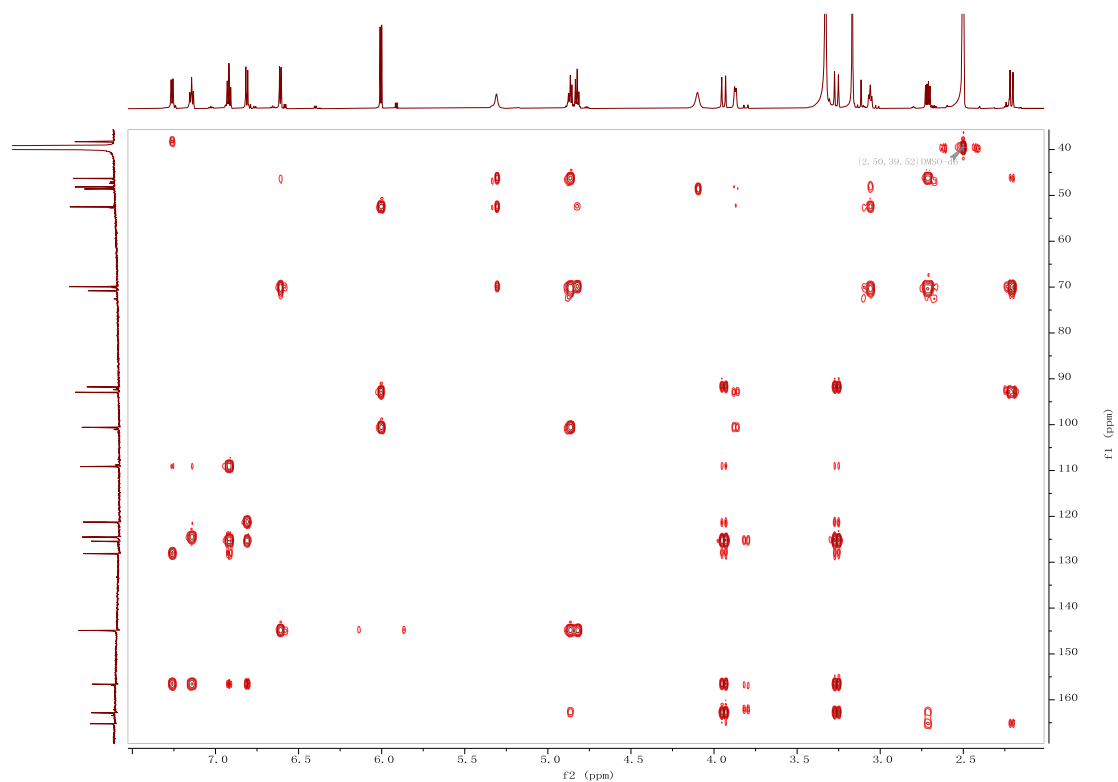

**Figure S6** NOESY spectrum of compound **1** in DMSO- $d_6$

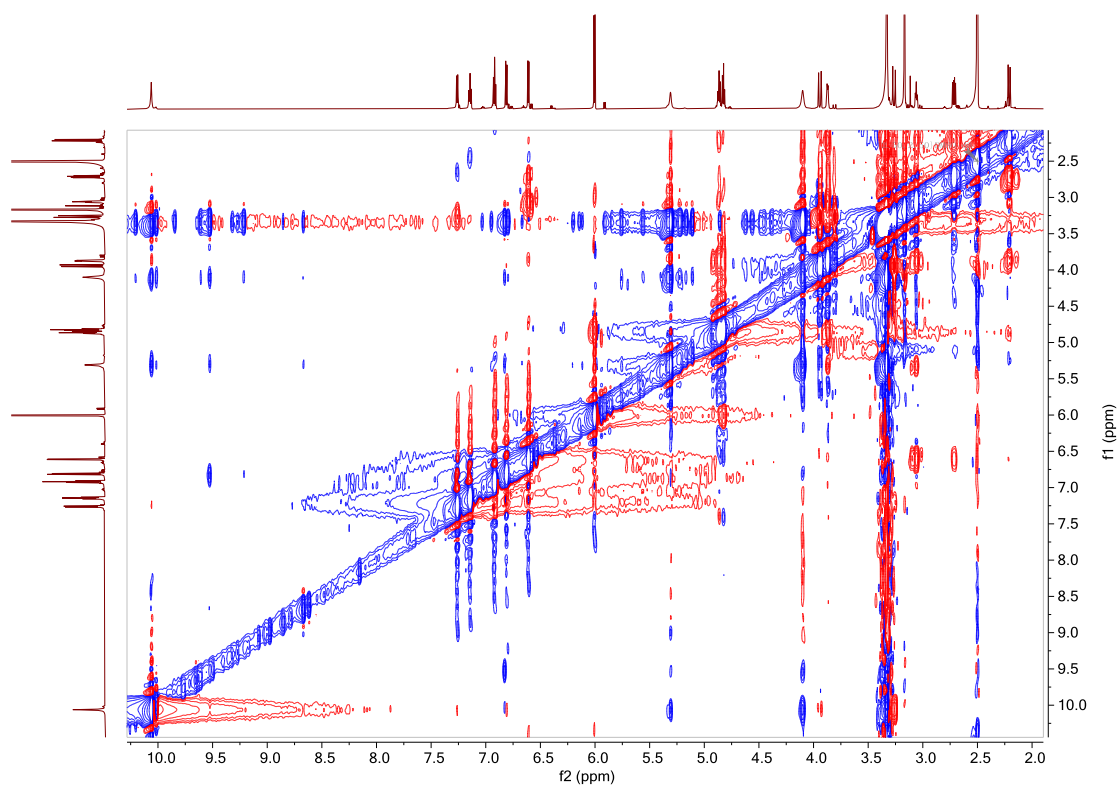

**Figure S7 HR-ESIMS spectrum of compound 1**

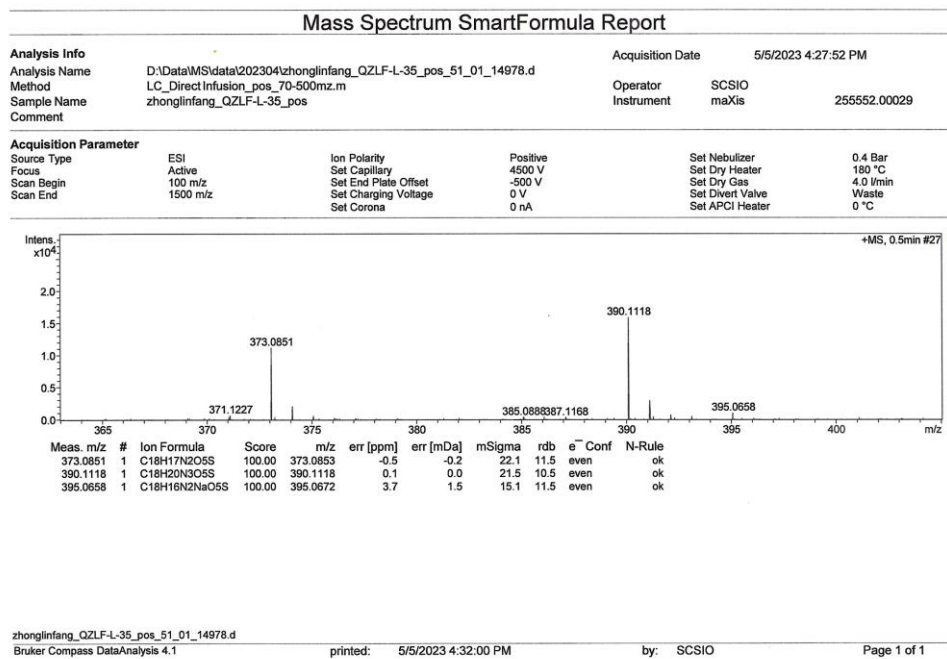

Figure S8 IR spectrum of compound 1

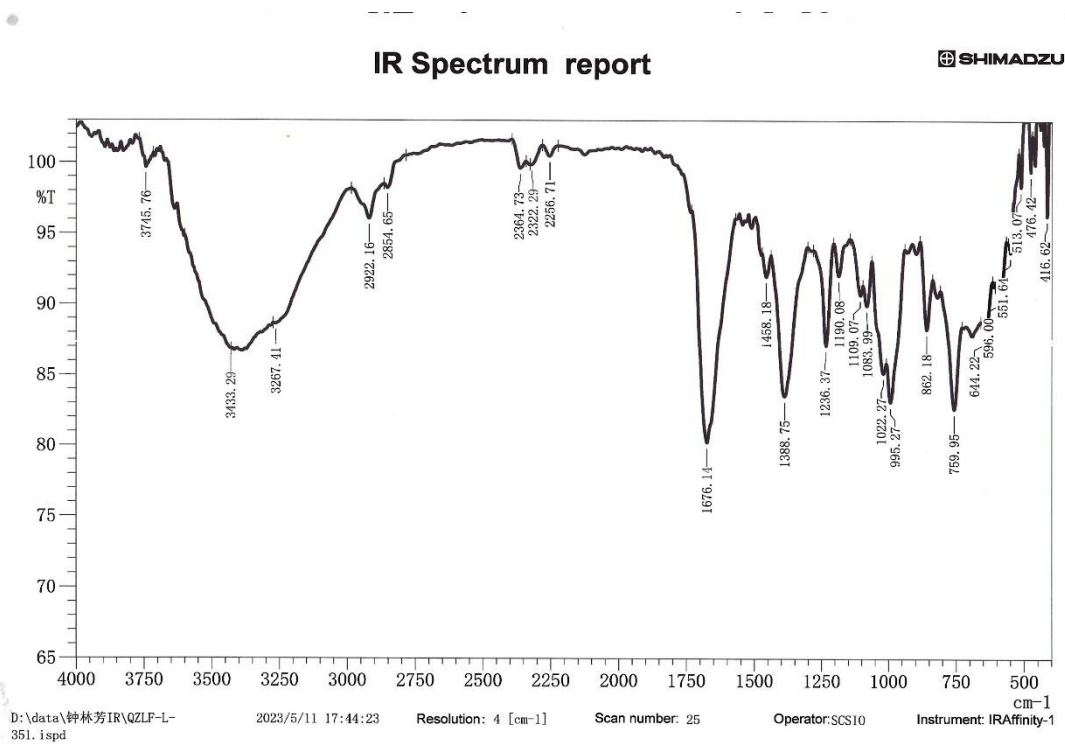

Figure S9 UV spectrum of compound 1

# 光谱峰值检测报告

2023/05/11 16:59:25

数据集: QZLF-L-35 - RawData

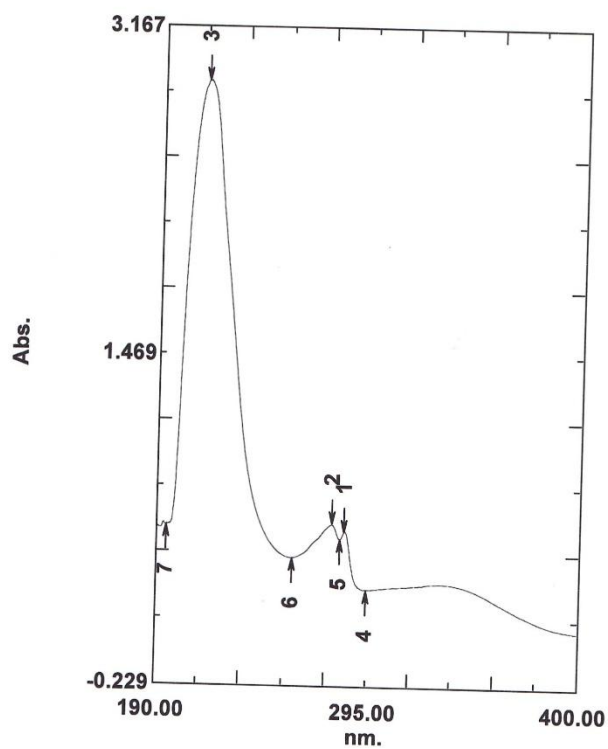

[测定属性]  
波长范围(nm): 190.00 到 400.00  
扫描速度: 中速  
采样间隔: 0.2  
自动采样间隔: 启用  
扫描模式: 单个

[仪器属性]  
仪器类型: UV-2600 系列  
测定方式: 吸收值  
狭缝宽: 2.0  
积分时间: 0.1 秒  
光源转换波长: 323.0 nm  
检测器单元: 直接  
S/R 转换: 标准  
阶梯校正: OFF

[附件属性]  
附件: 无

[数据处理参数]  
阈值: 0.0500000  
点: 4  
内插: 停用  
平均: 停用

[样品准备属性]  
重量:  
体积:  
稀释:  
光程长:  
附加信息:

| No. | P/V | 波长(nm) | Abs.  | 描述 |
|-----|-----|--------|-------|----|
| 1   | ⑦   | 283.20 | 0.560 |    |
| 2   | ②   | 276.60 | 0.596 |    |
| 3   | ③   | 211.80 | 2.884 |    |
| 4   | ④   | 294.40 | 0.261 |    |
| 5   | ⑤   | 280.80 | 0.520 |    |
| 6   | ⑥   | 257.20 | 0.423 |    |
| 7   | ⑦   | 194.40 | 0.585 |    |

**Figure S10**  $^1\text{H}$  NMR spectrum of compound **2** in  $\text{DMSO}-d_6$

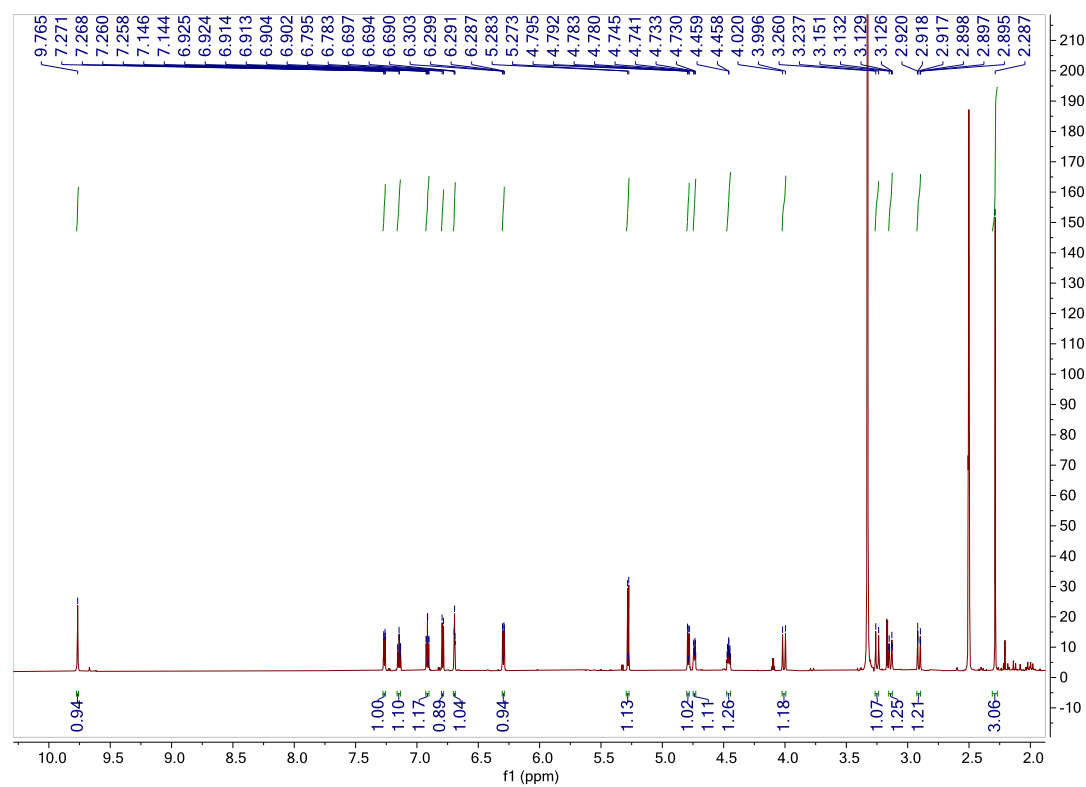



**Figure S11**  $^{13}\text{C}$  NMR spectrum of compound **2** in  $\text{DMSO-}d_6$

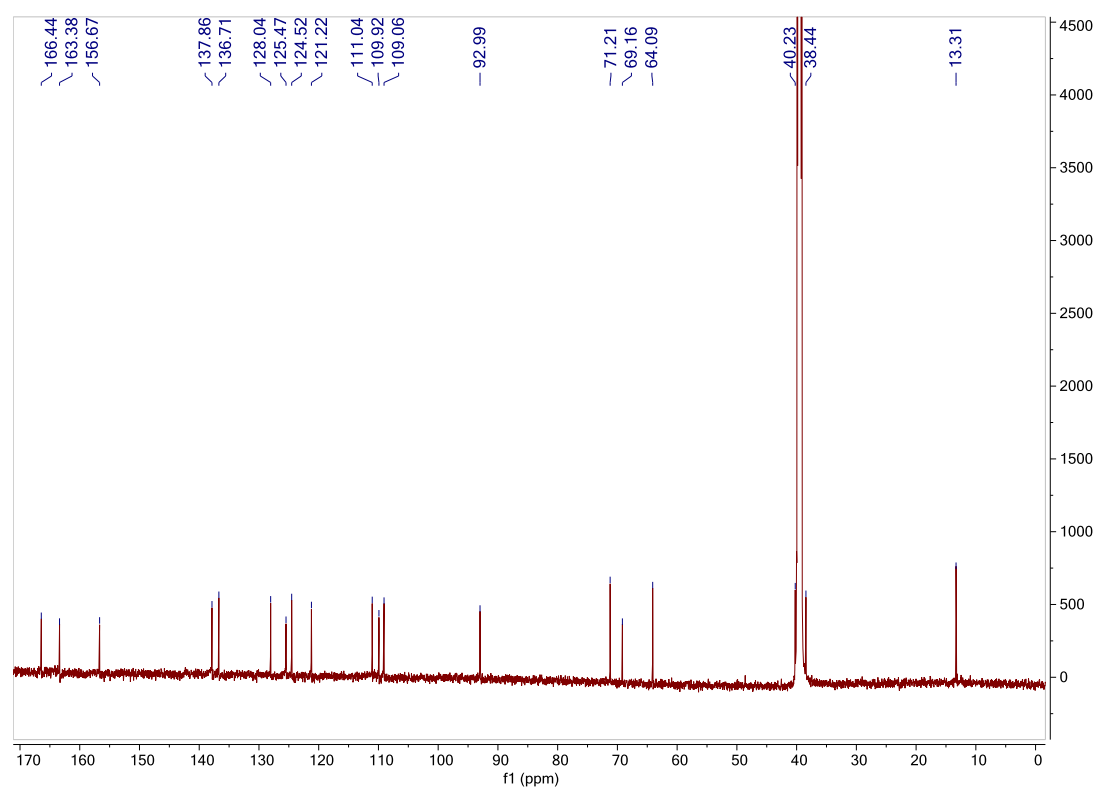

**Figure S12**  $^1\text{H}$ - $^1\text{H}$  COSY spectrum of compound **2** in  $\text{DMSO-}d_6$

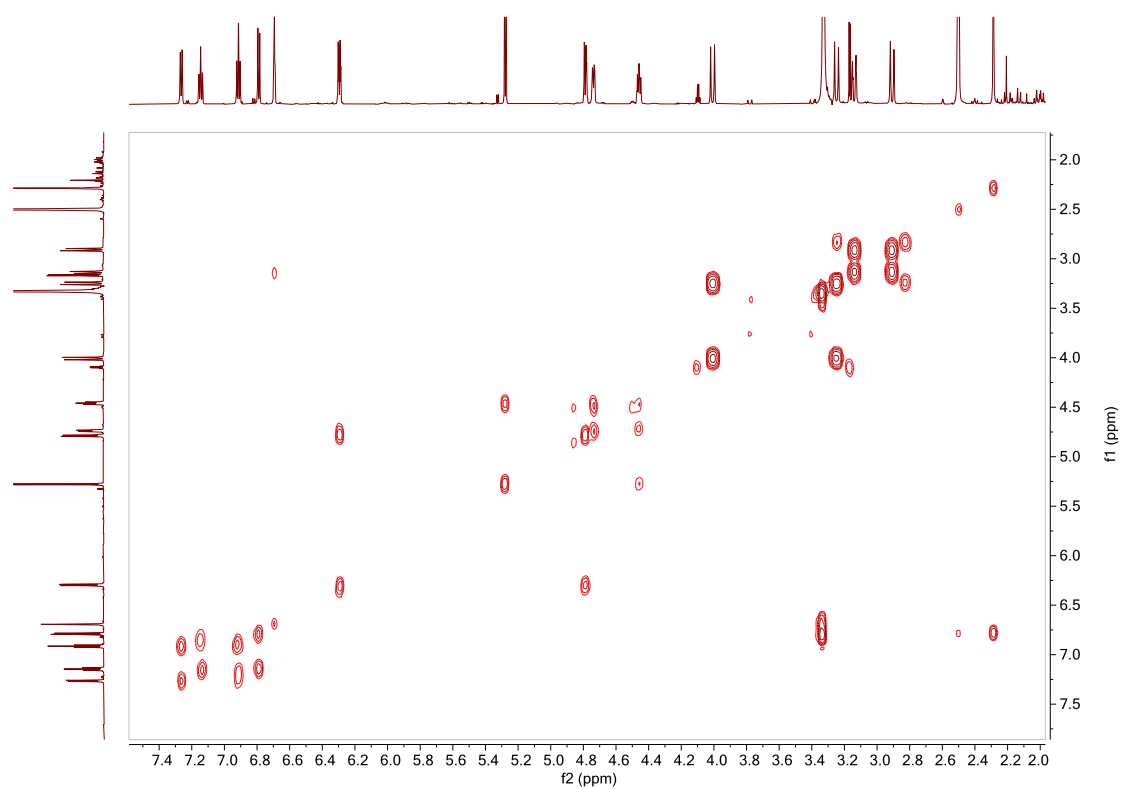

**Figure S13** HSQC spectrum of compound **2** in  $\text{DMSO-}d_6$

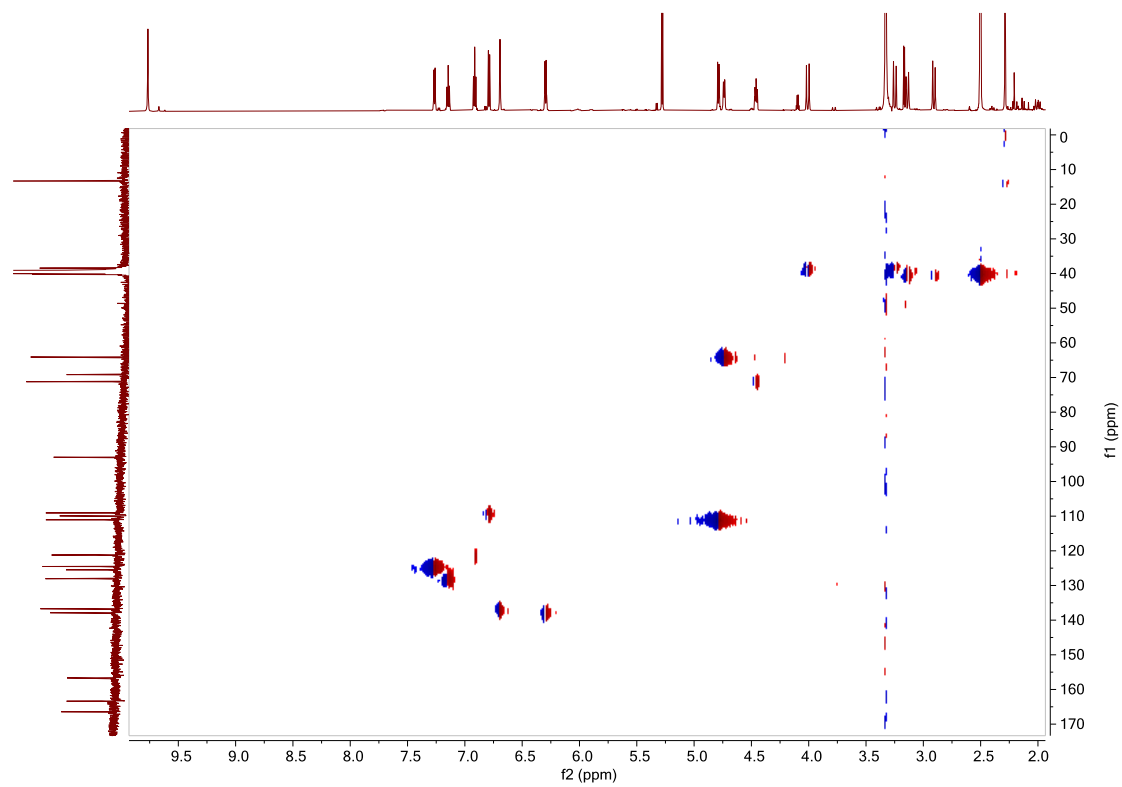

**Figure S14** HMBC spectrum of compound **2** in DMSO- $d_6$

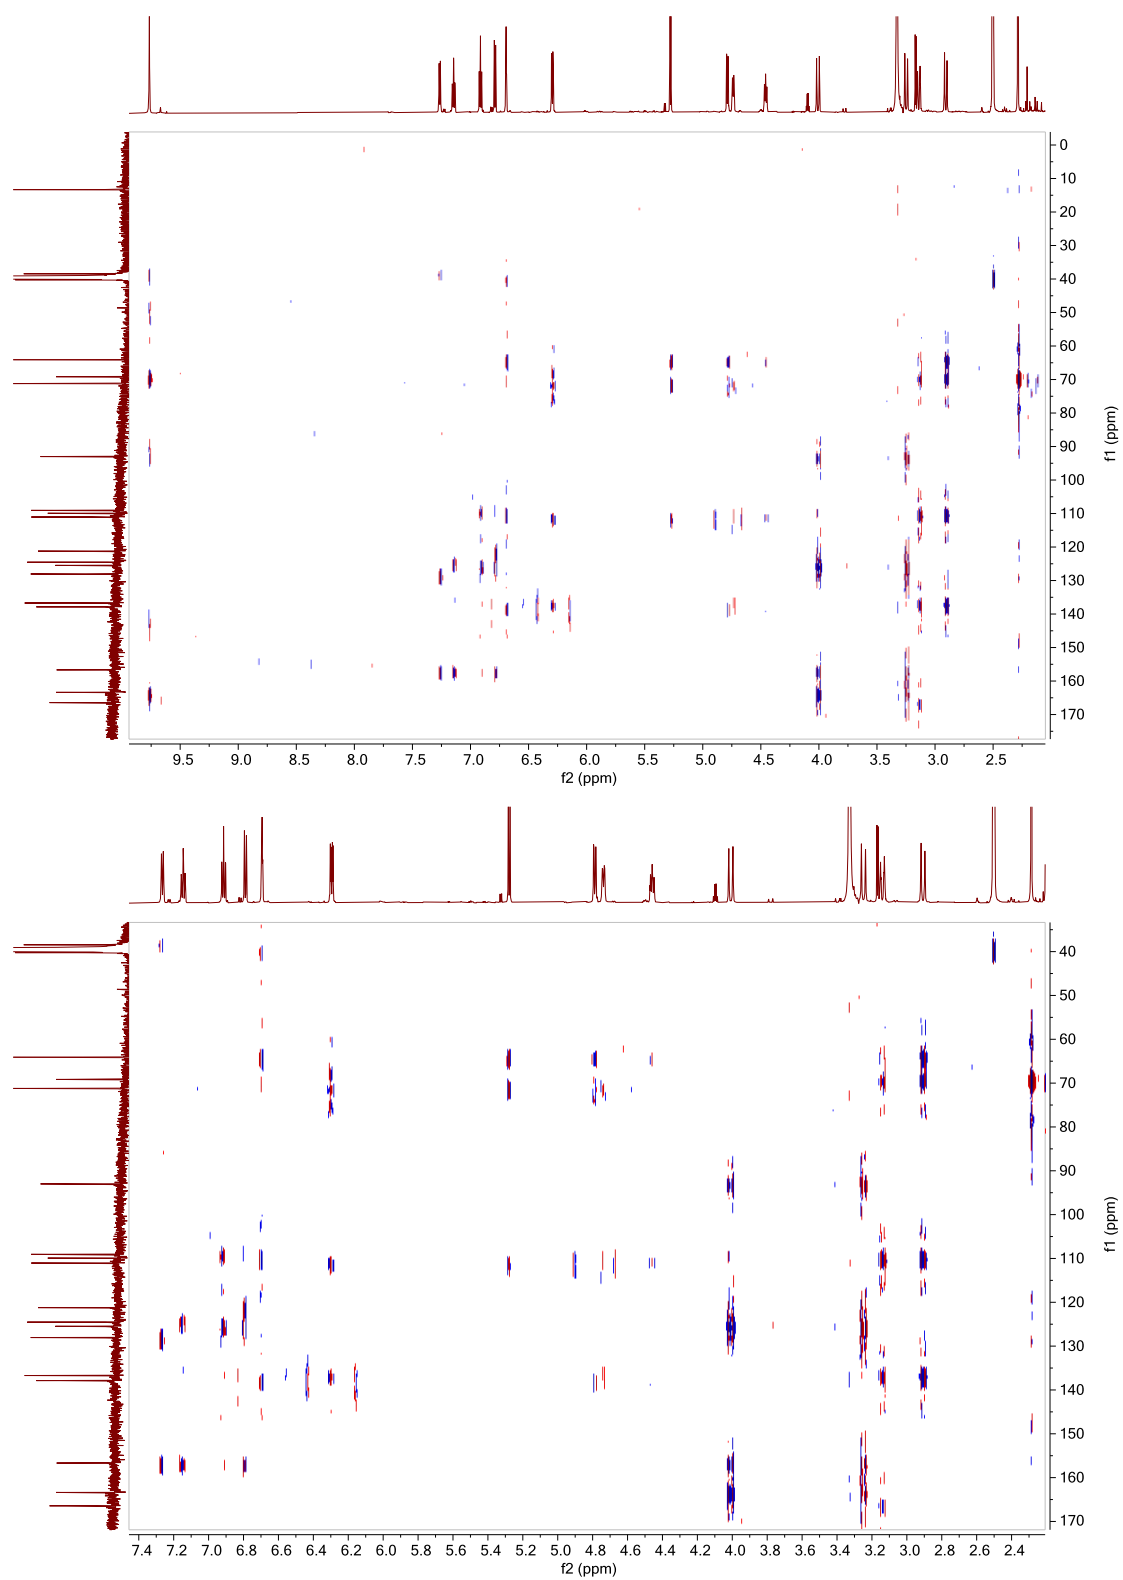

**Figure S15** NOESY spectrum of compound **2** in DMSO- $d_6$

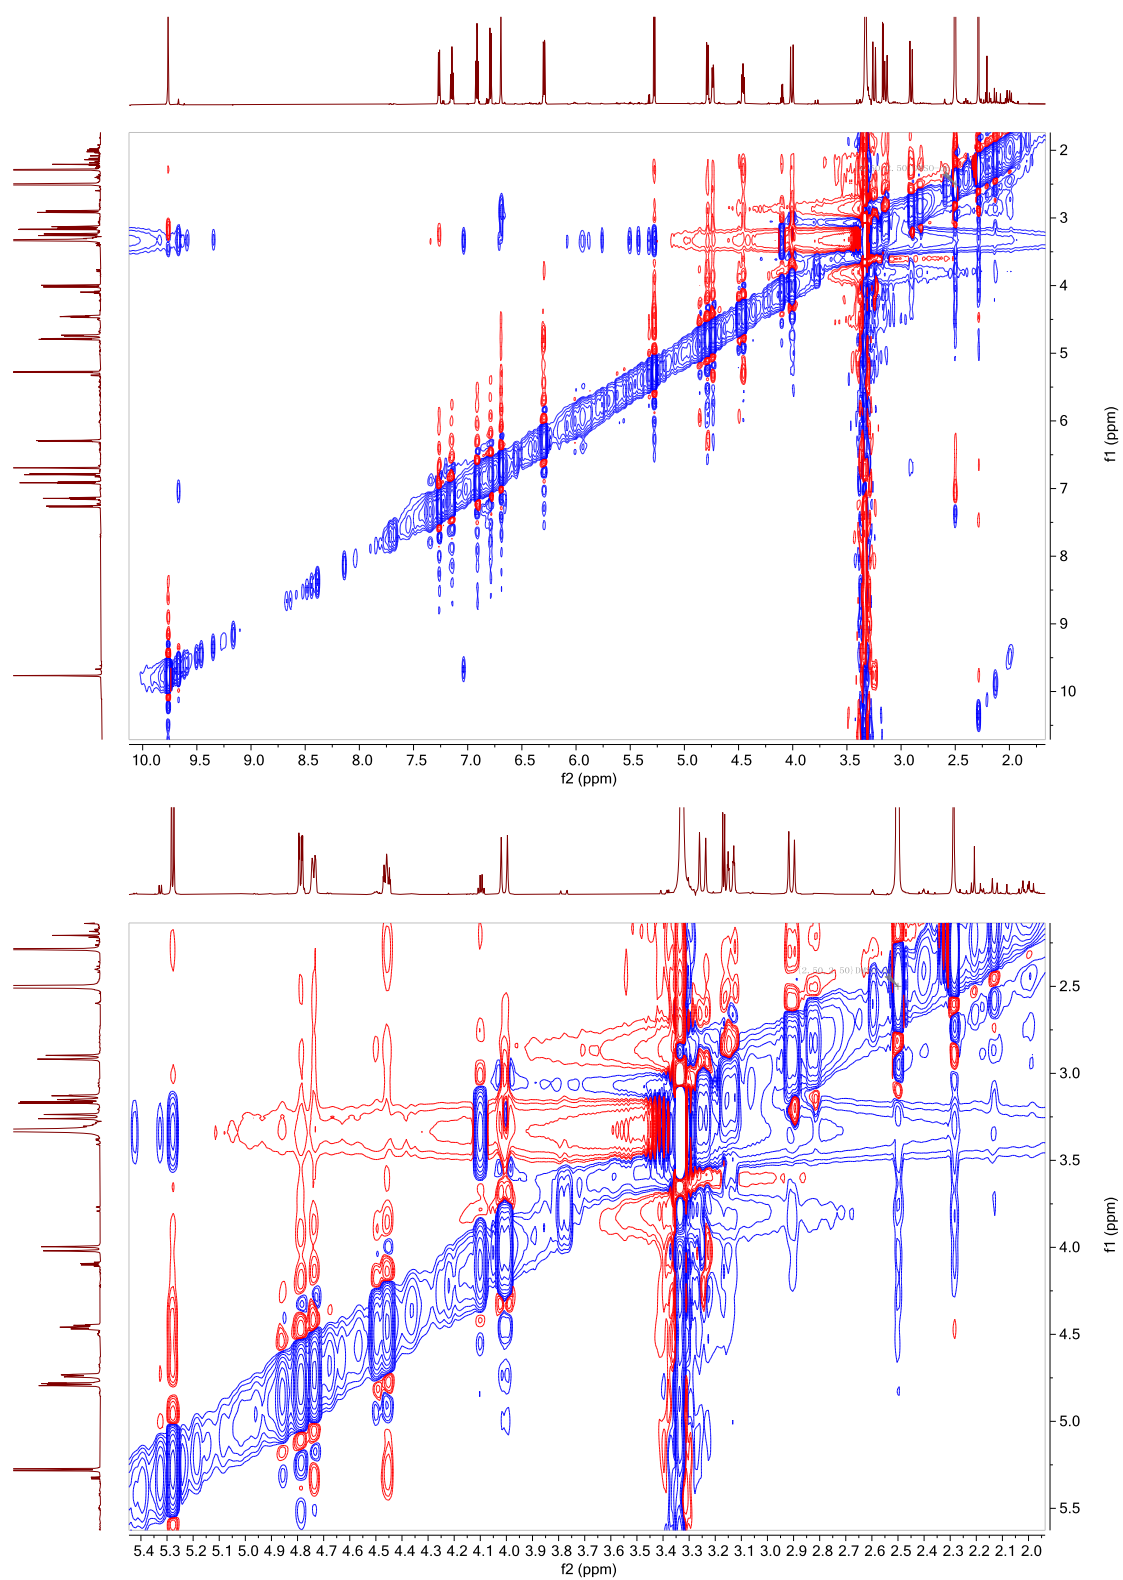

**Figure S16** HR-ESIMS spectrum of compound **2**

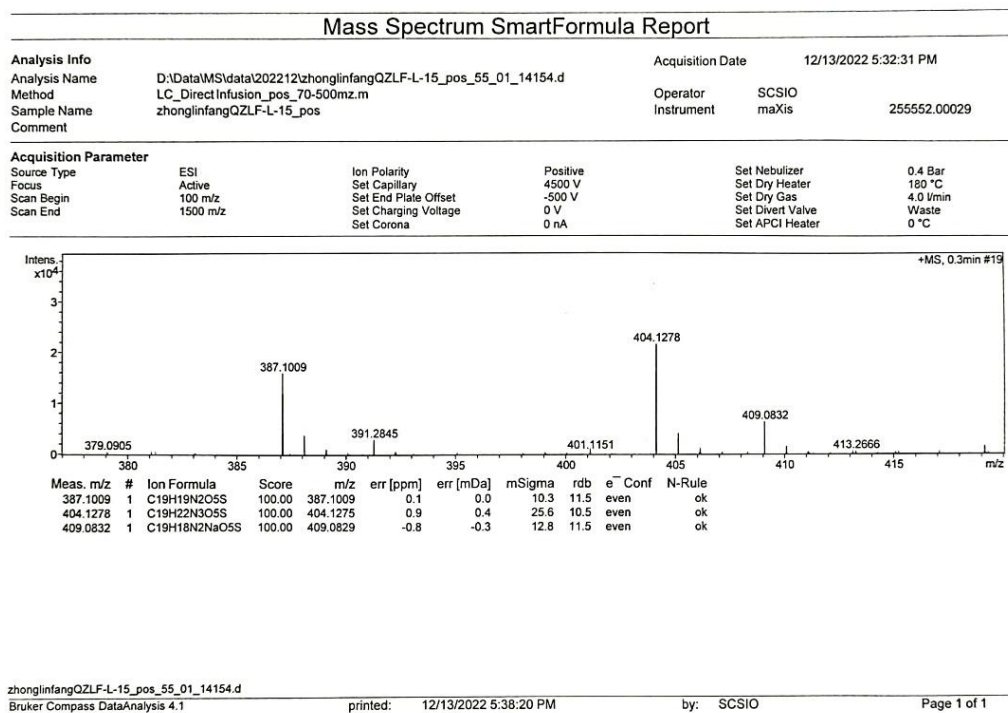

Figure S17 IR spectrum of compound 2

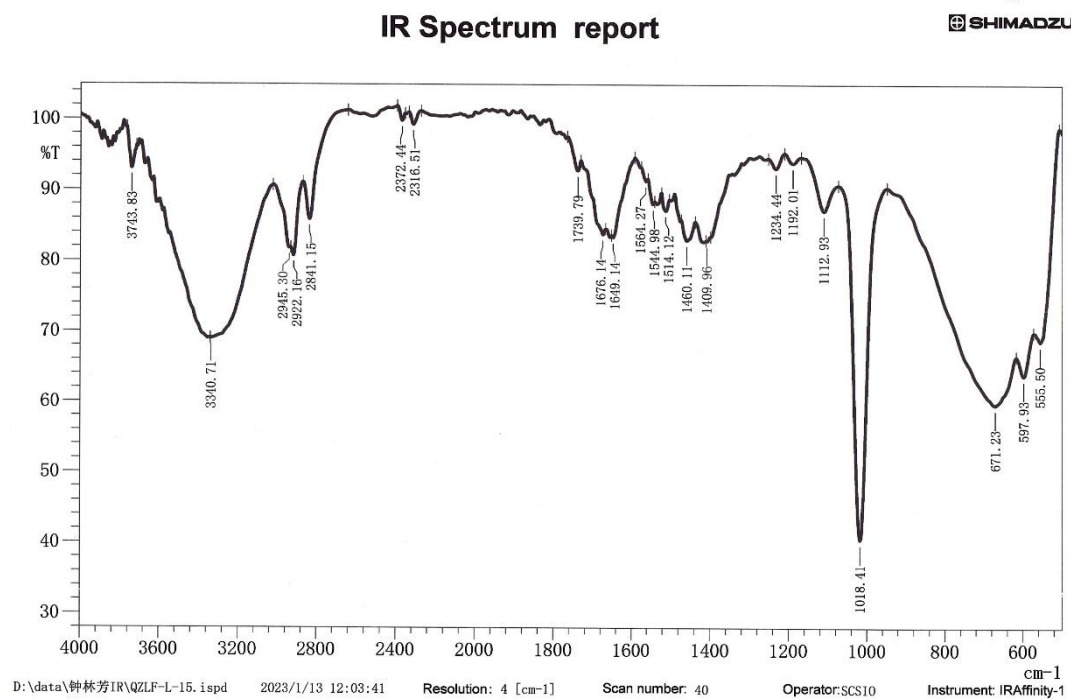

Figure S18 UV spectrum of compound 2

光谱峰值检测报告

2023/01/12 13:03:44

数据集: QZLF-L-15 - RawData

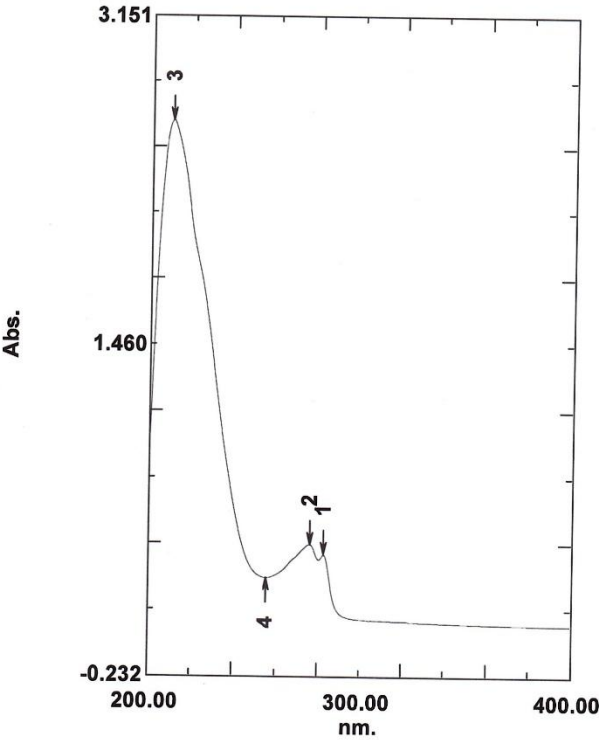

[测定属性]  
波长范围 (nm): 200.00 到 400.00  
扫描速度: 中速  
采样间隔: 0.2  
自动采样间隔: 启用  
扫描模式: 单个

[仪器属性]  
仪器类型: UV-2600 系列  
测定方式: 吸收值  
狭缝宽: 2.0  
积分时间: 0.1 秒  
光源转换波长: 323.0 nm  
检测器单元: 直接  
S/R 转换: 标准  
阶梯校正: OFF

[附件属性]  
附件: 无

[数据处理参数]  
阈值: 0.0500000  
点: 4  
内插: 停用  
平均: 停用

[样品准备属性]  
重量:  
体积:  
稀释:  
光程长:  
附加信息:

| No. | P/V | 波长 (nm) | Abs.  | 描述 |
|-----|-----|---------|-------|----|
| 1   | ①   | 282.89  | 0.386 |    |
| 2   | ②   | 276.00  | 0.439 |    |
| 3   | ③   | 209.80  | 2.610 |    |
| 4   | ④   | 256.00  | 0.267 |    |

**Figure S19**  $^1\text{H}$  NMR spectrum of compound **3** in  $\text{DMSO-}d_6$

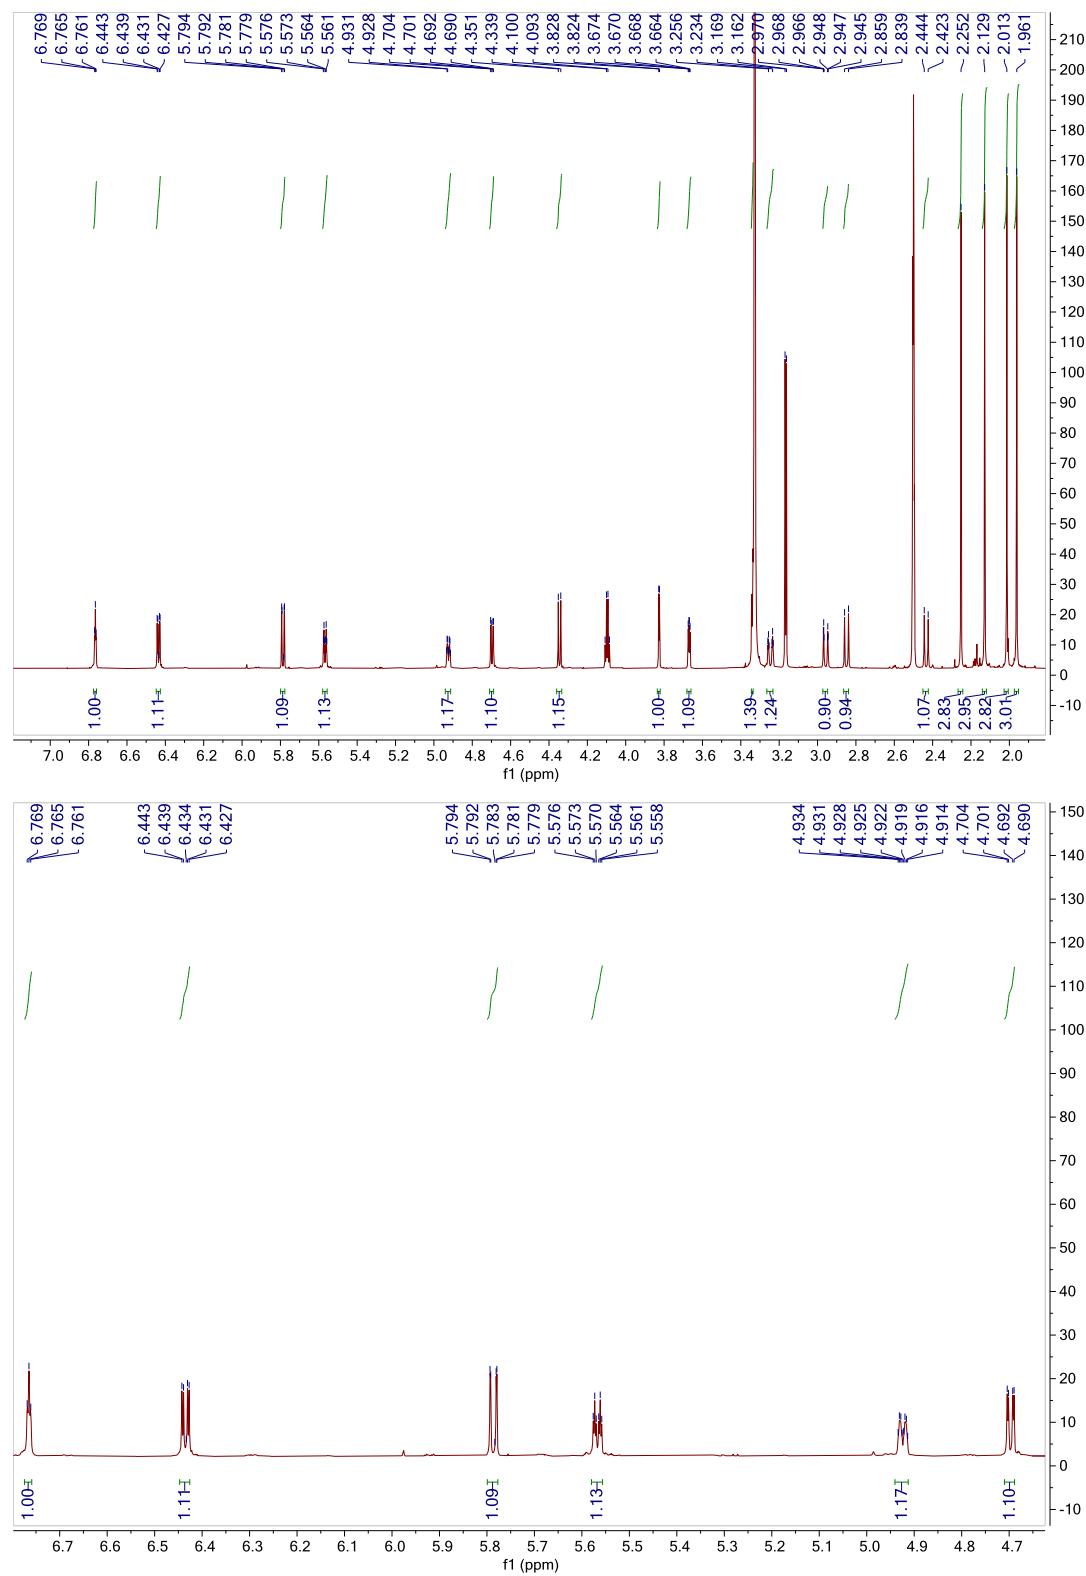



**Figure S20**  $^{13}\text{C}$  NMR spectrum of compound **3** in  $\text{DMSO-}d_6$

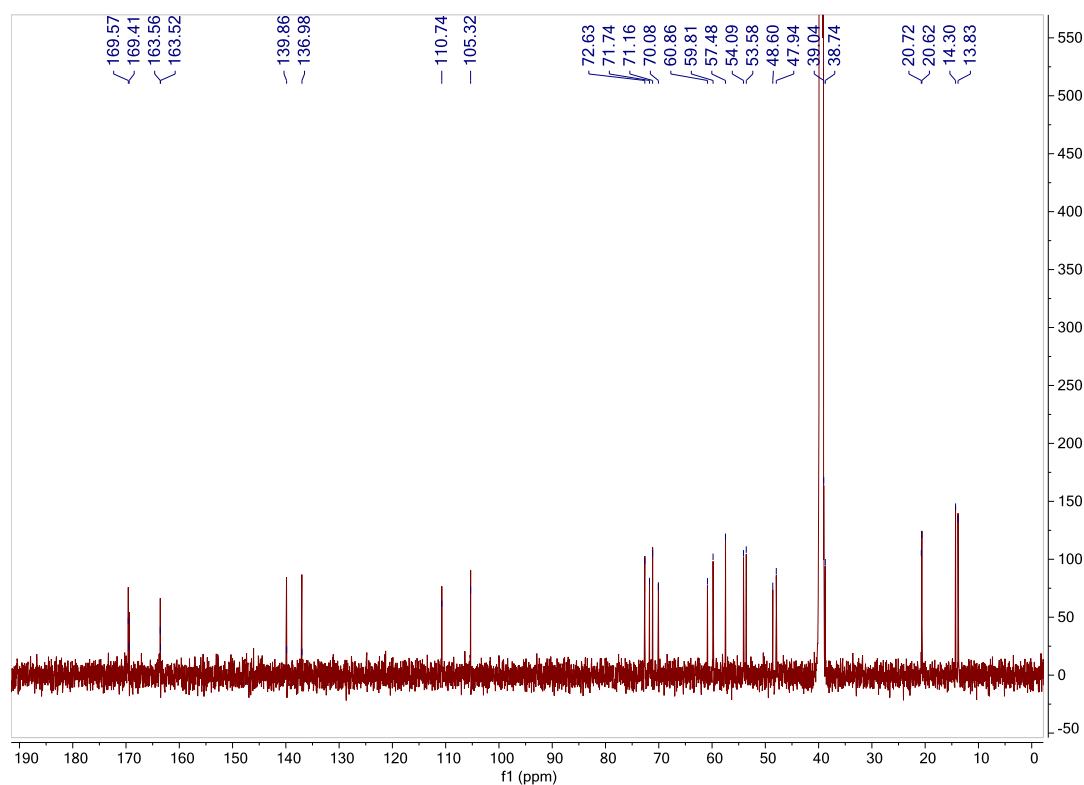

**Figure S21**  $^1\text{H}$ - $^1\text{H}$  COSY spectrum of compound **3** in  $\text{DMSO-}d_6$

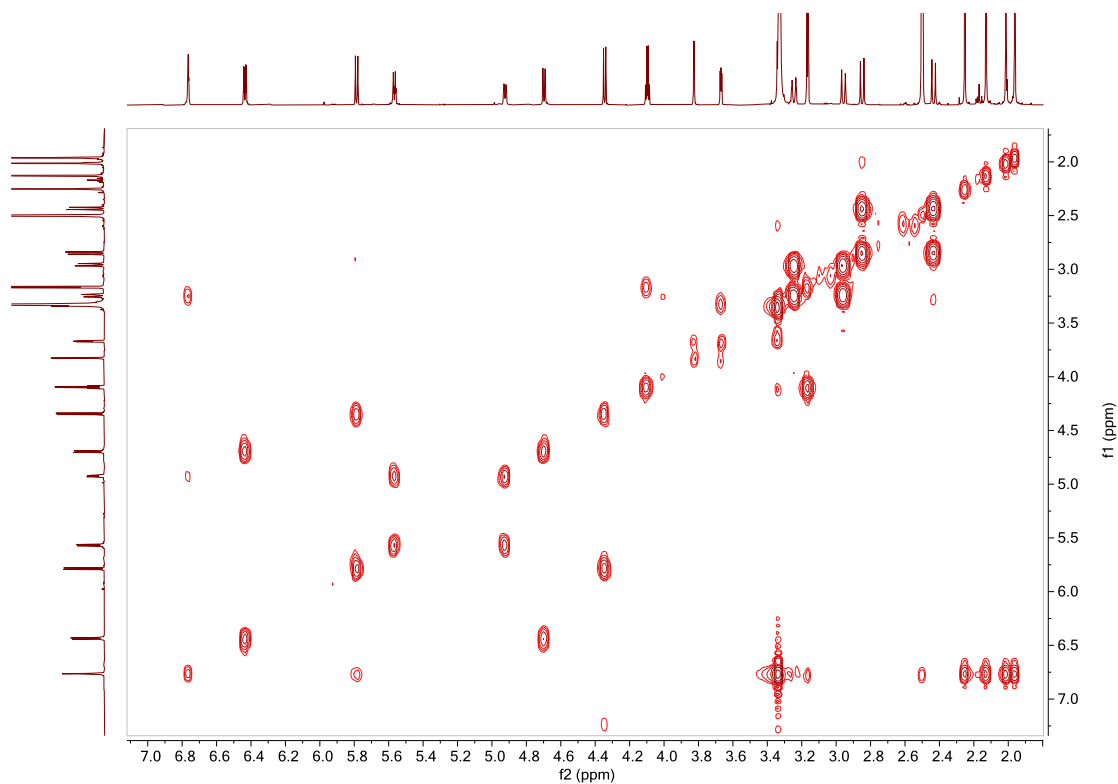

**Figure S22** HSQC spectrum of compound **3** in DMSO- $d_6$

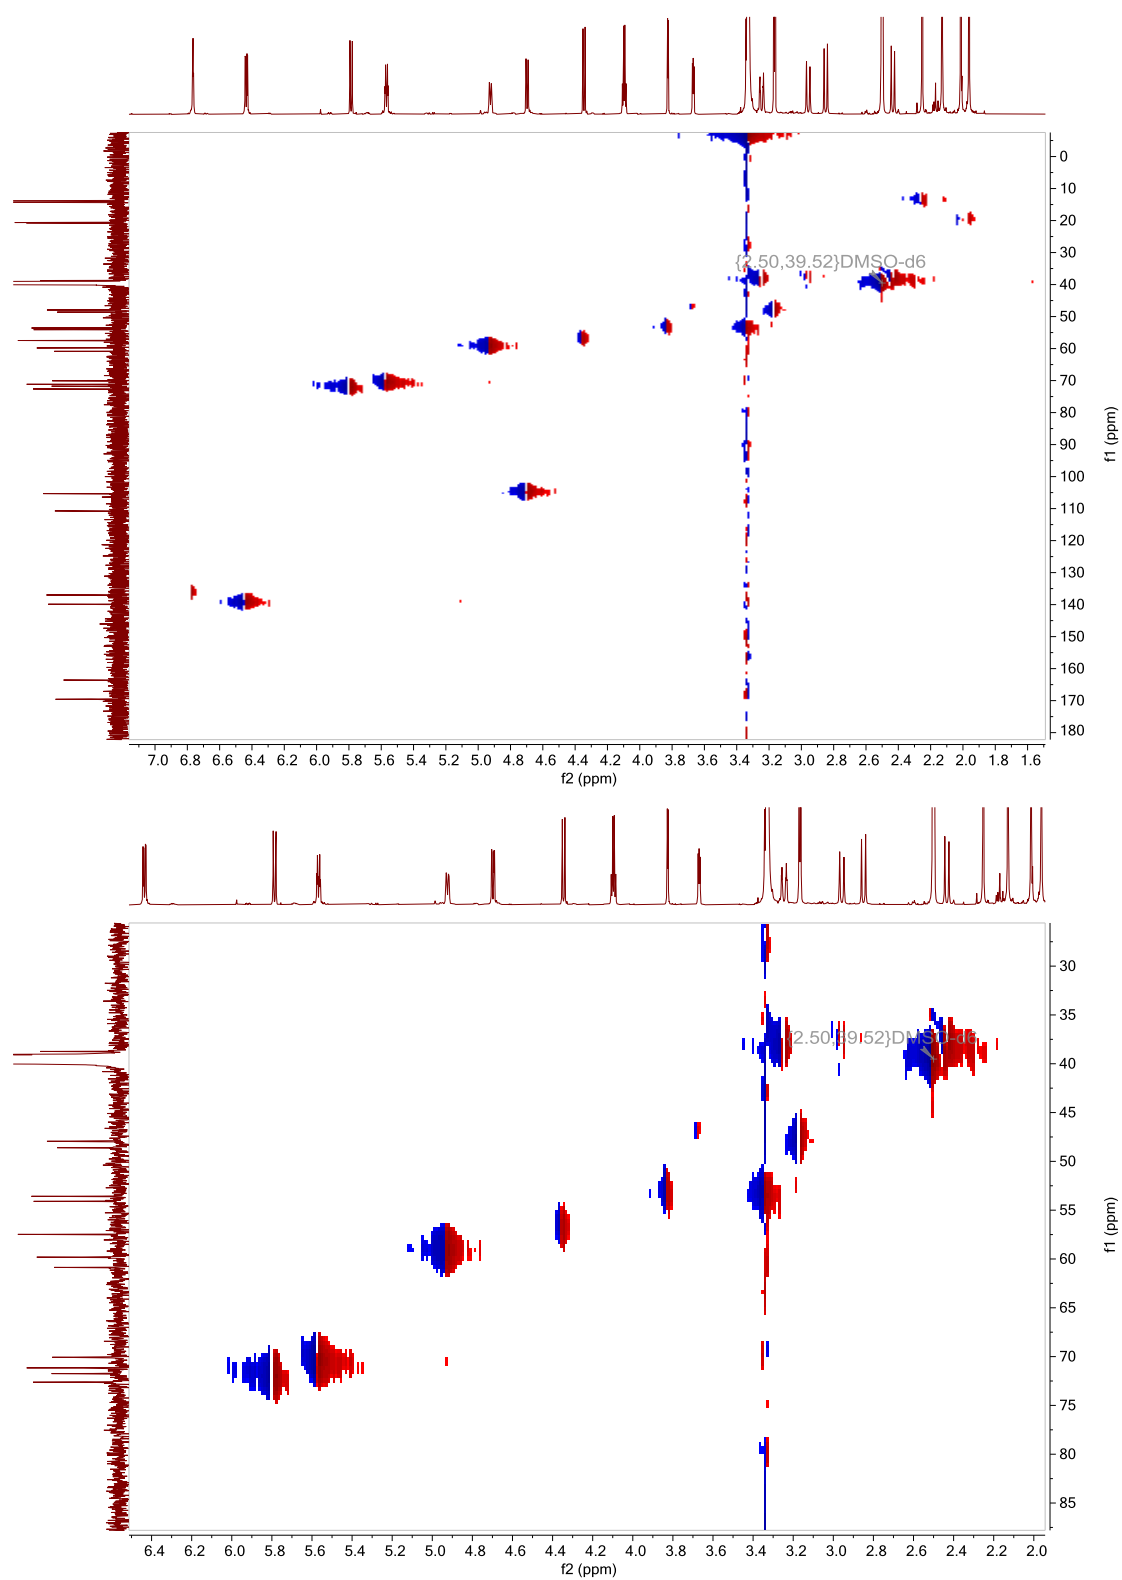

**Figure S23** HMBC spectrum of compound **3** in DMSO-*d*<sub>6</sub>

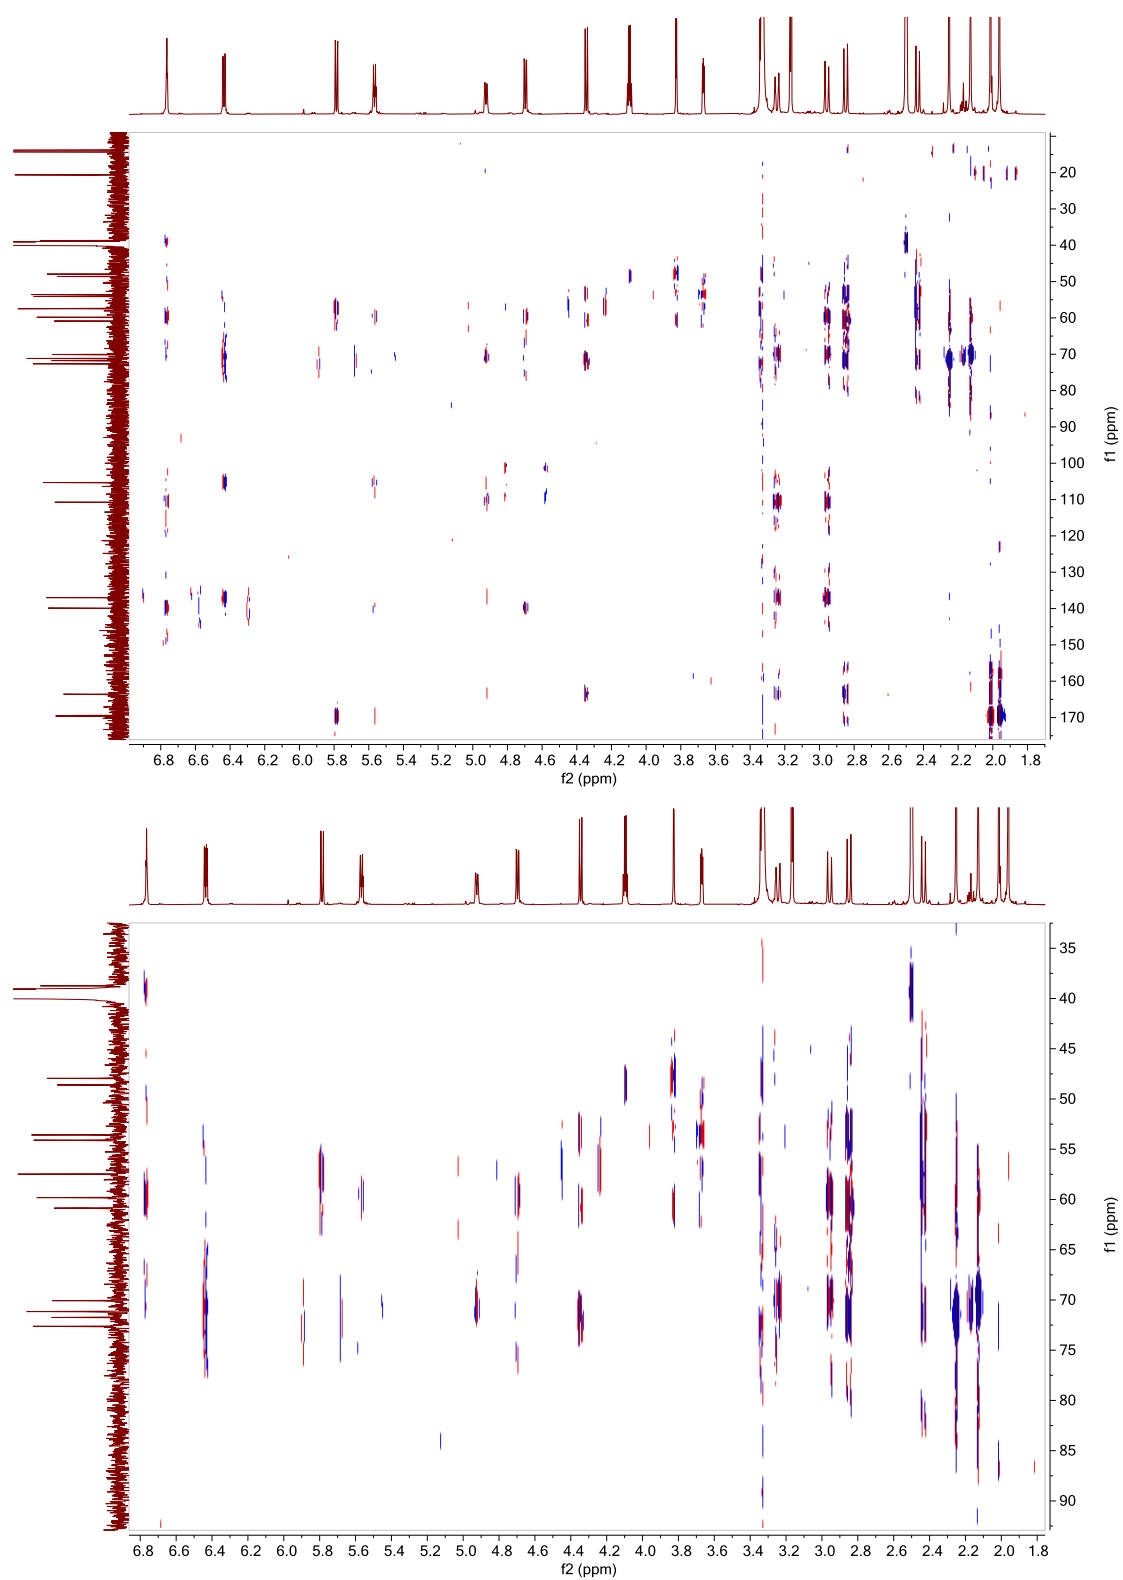

**Figure S24** NOESY spectrum of compound **3** in DMSO- $d_6$

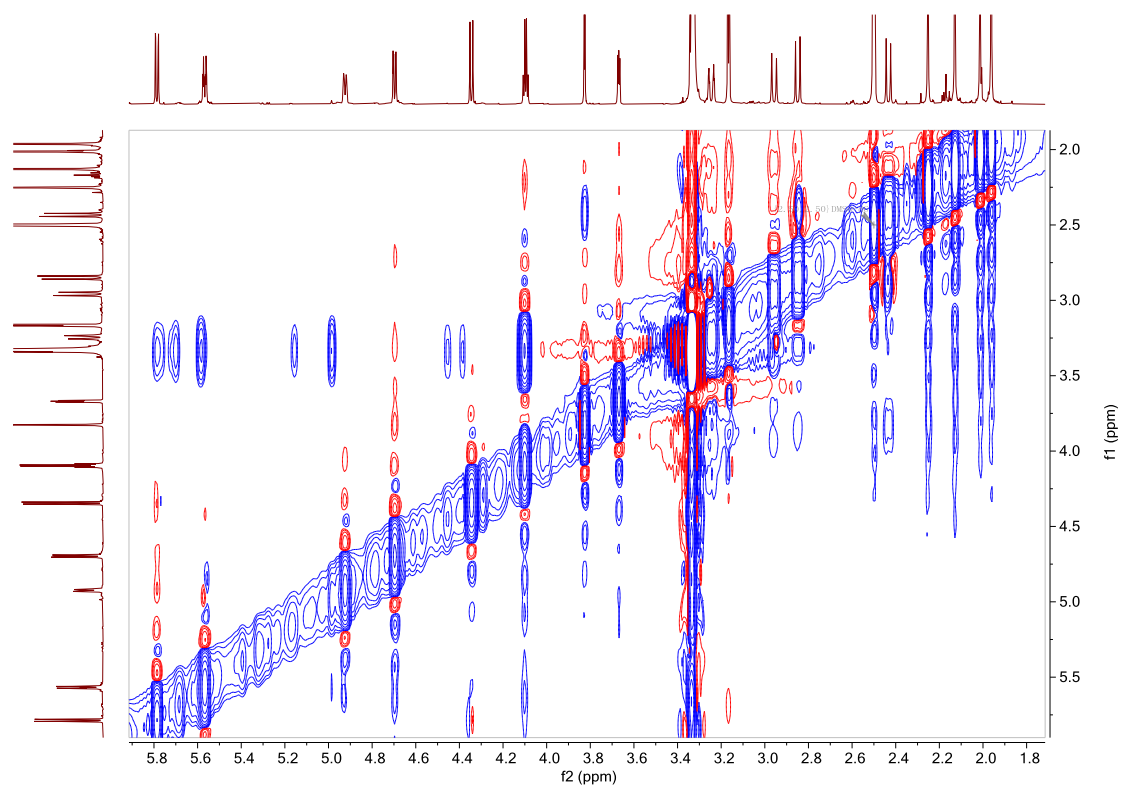

**Figure S25** HR-ESIMS spectrum of compound **3**

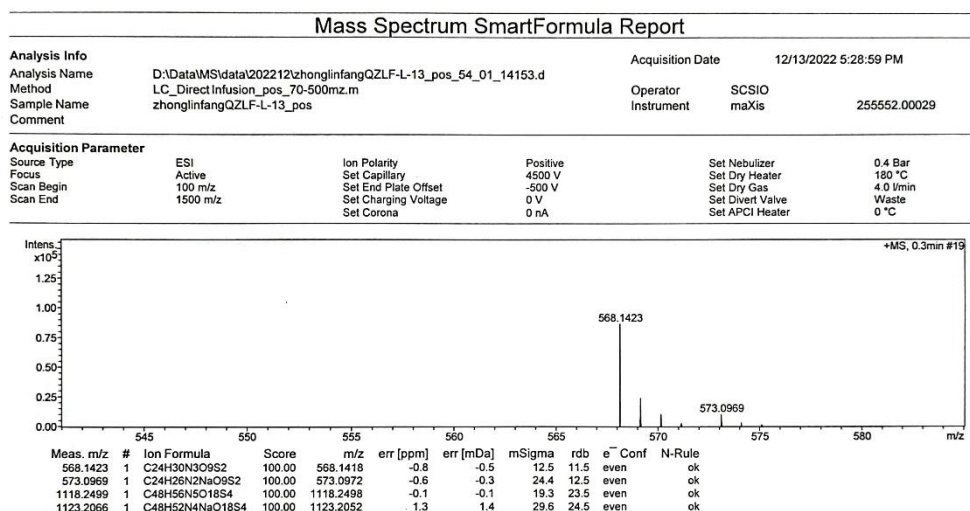

zhonglinfangQZLF-L-13\_pos\_54\_01\_14153.d  
Bruker Compass DataAnalysis 4.1

printed: 12/13/2022 5:35:29 PM

by: SCSIO

Page 1 of 1

Figure S26 IR spectrum of compound 3

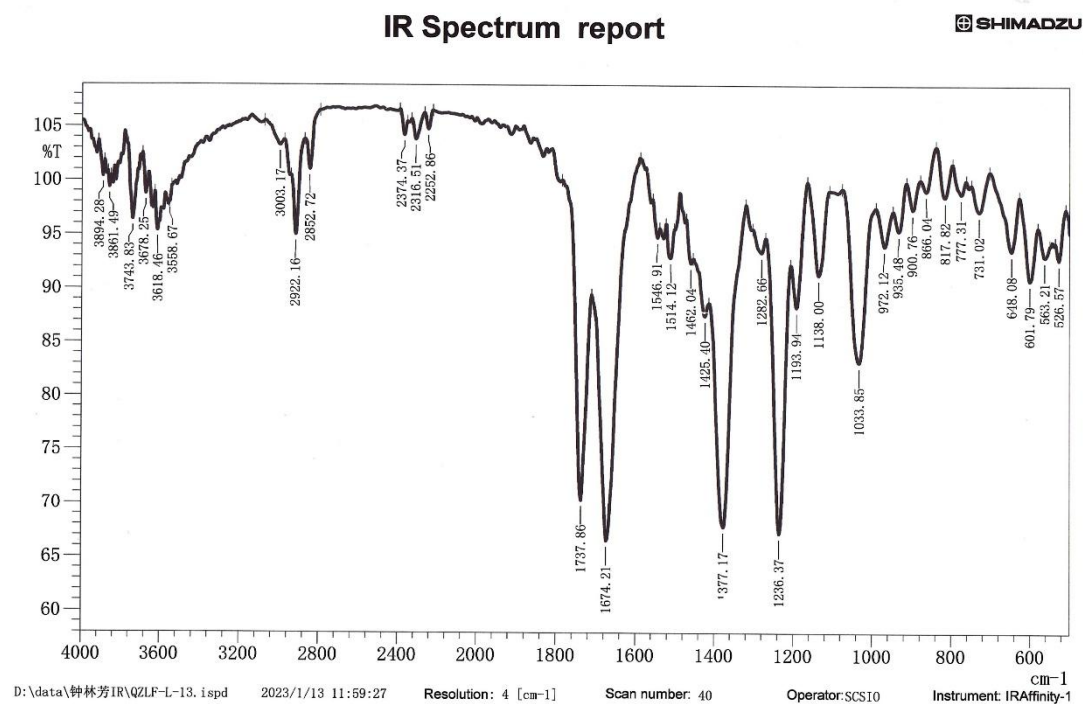

Figure S27 UV spectrum of compound 3

光谱峰值检测报告

2023/01/12 13:23:45

数据集: QZLF-L-13 - RawData

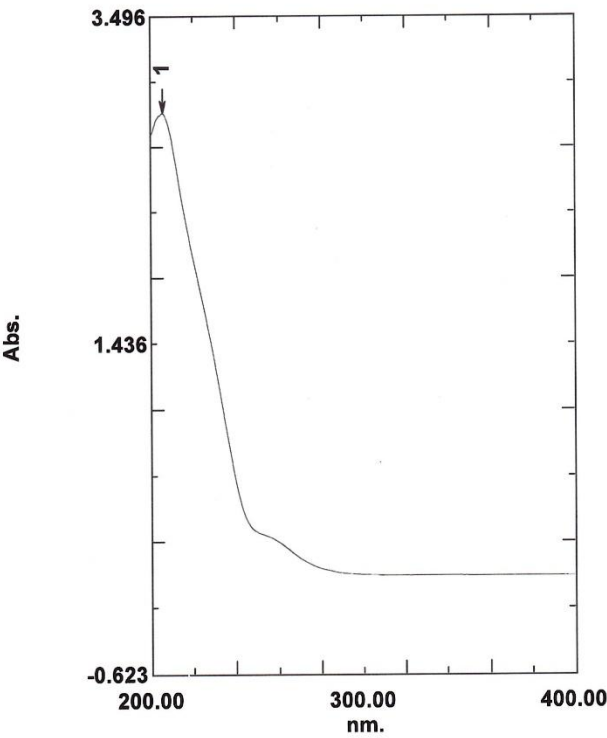

[测定属性]  
波长范围 (nm): 200.00 到 400.00  
扫描速度: 中速  
采样间隔: 0.2  
自动采样间隔: 启用  
扫描模式: 单个

[仪器属性]  
仪器类型: UV-2600 系列  
测定方式: 吸收值  
狭缝宽: 2.0  
积分时间: 0.1 秒  
光源转换波长: 323.0 nm  
检测器单元: 直接  
S/R 转换: 标准  
阶梯校正: OFF

[附件属性]  
附件: 无

[数据处理参数]  
阈值: 0.0500000  
点: 4  
内插: 停用  
平均: 停用

[样品准备属性]  
重量:  
体积:  
稀释:  
光程长:  
附加信息:

| No. | P/V | 波长 (nm) | Abs.  | 描述 |
|-----|-----|---------|-------|----|
| 1   | ⑤   | 205.80  | 2.887 |    |

**Figure S28**  $^1\text{H}$  NMR spectrum of compound **4** in  $\text{DMSO-}d_6$

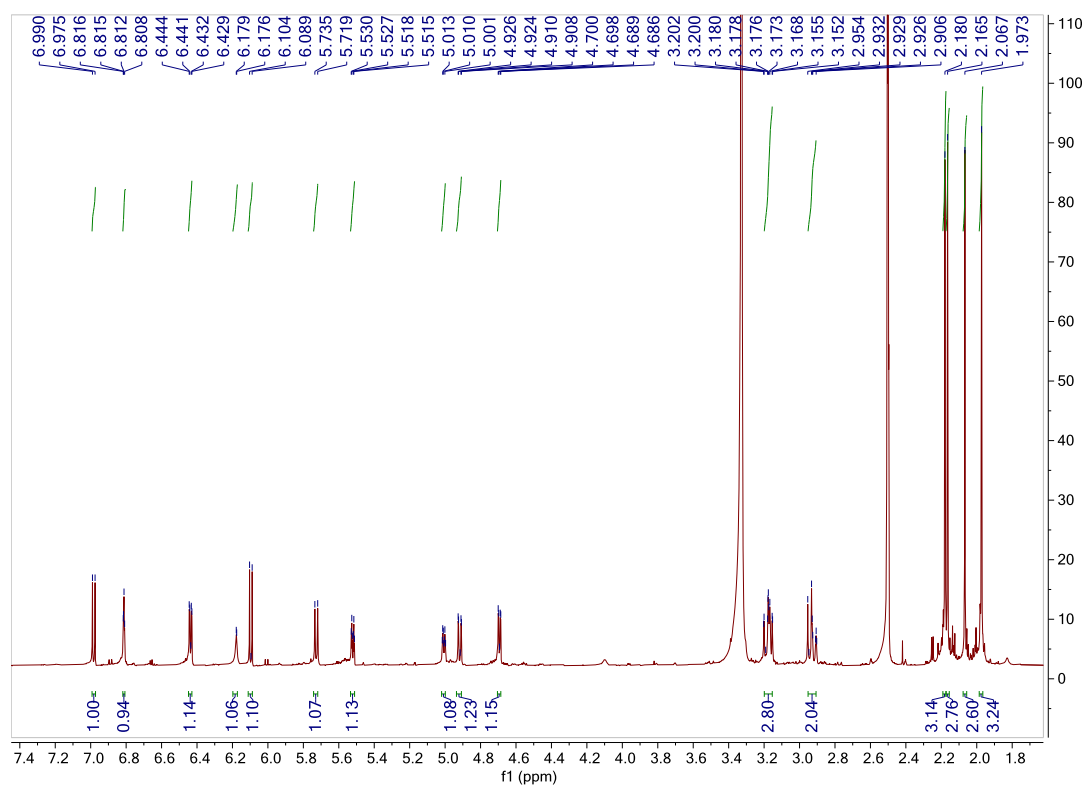

**Figure S29**  $^{13}\text{C}$  NMR spectrum of compound **4** in  $\text{DMSO-}d_6$

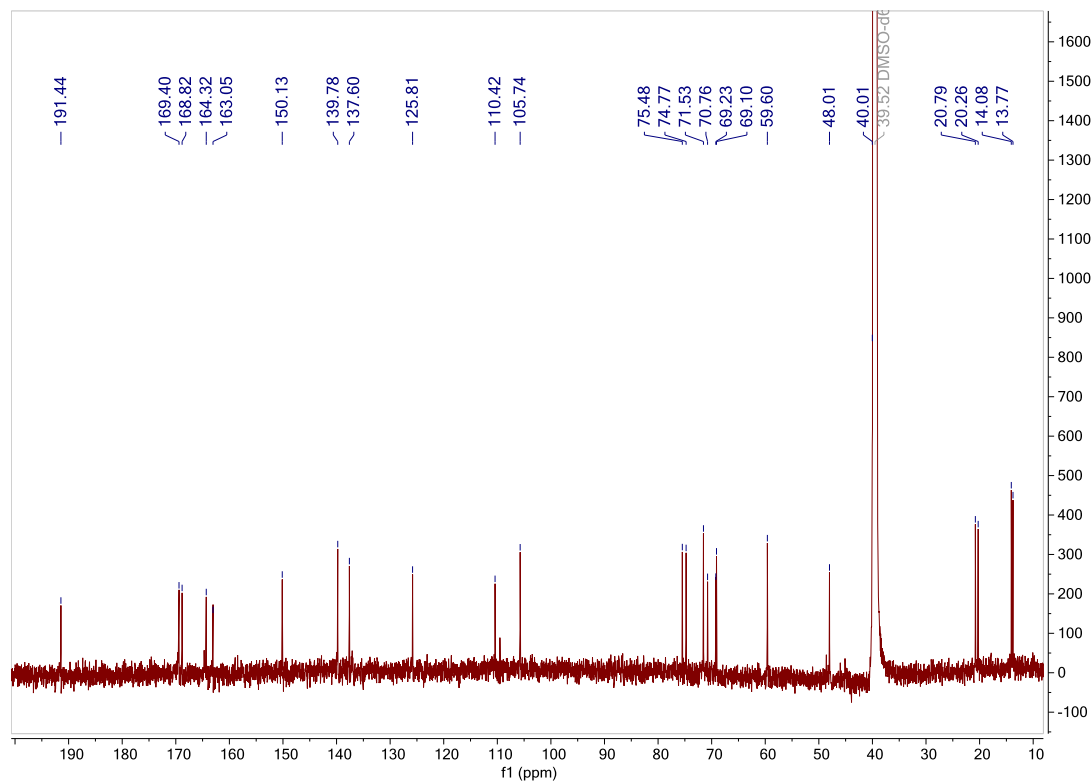



**Figure S30**  $^1\text{H}$ - $^1\text{H}$  COSY spectrum of compound **4** in  $\text{DMSO-}d_6$

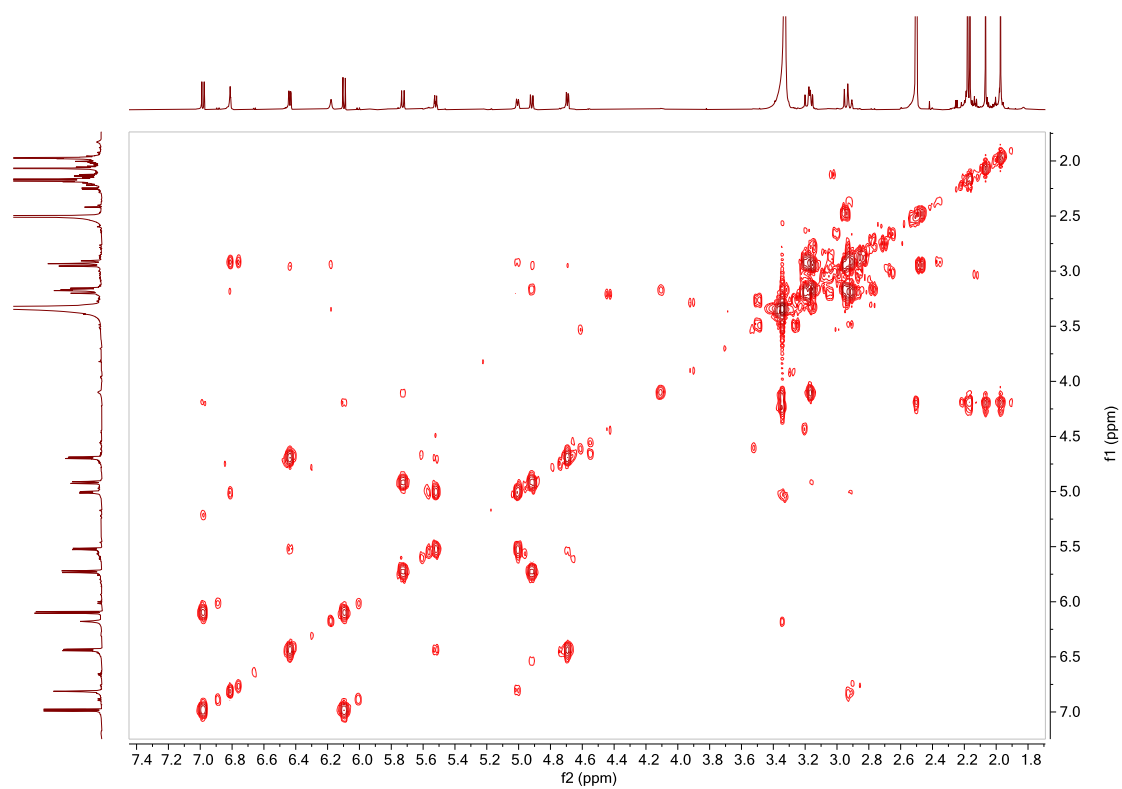

**Figure S31** HSQC spectrum of compound **4** in DMSO- $d_6$

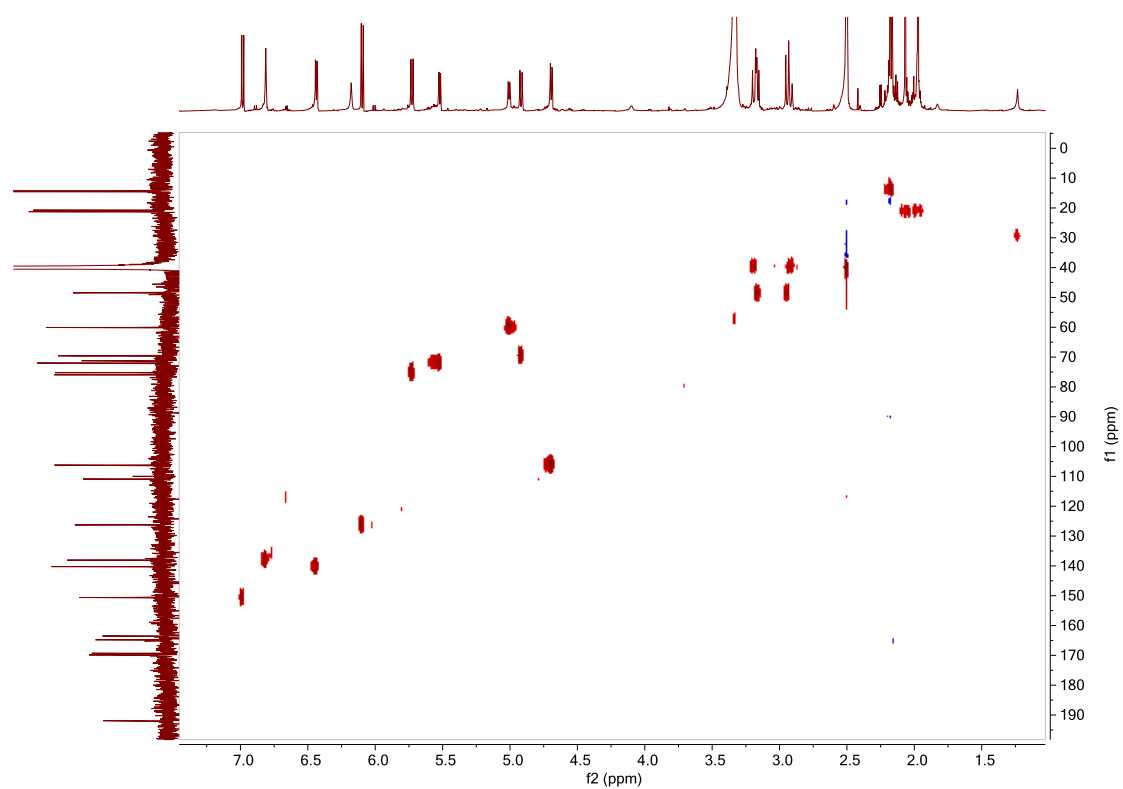

**Figure S32** HMBC spectrum of compound **4** in DMSO- $d_6$

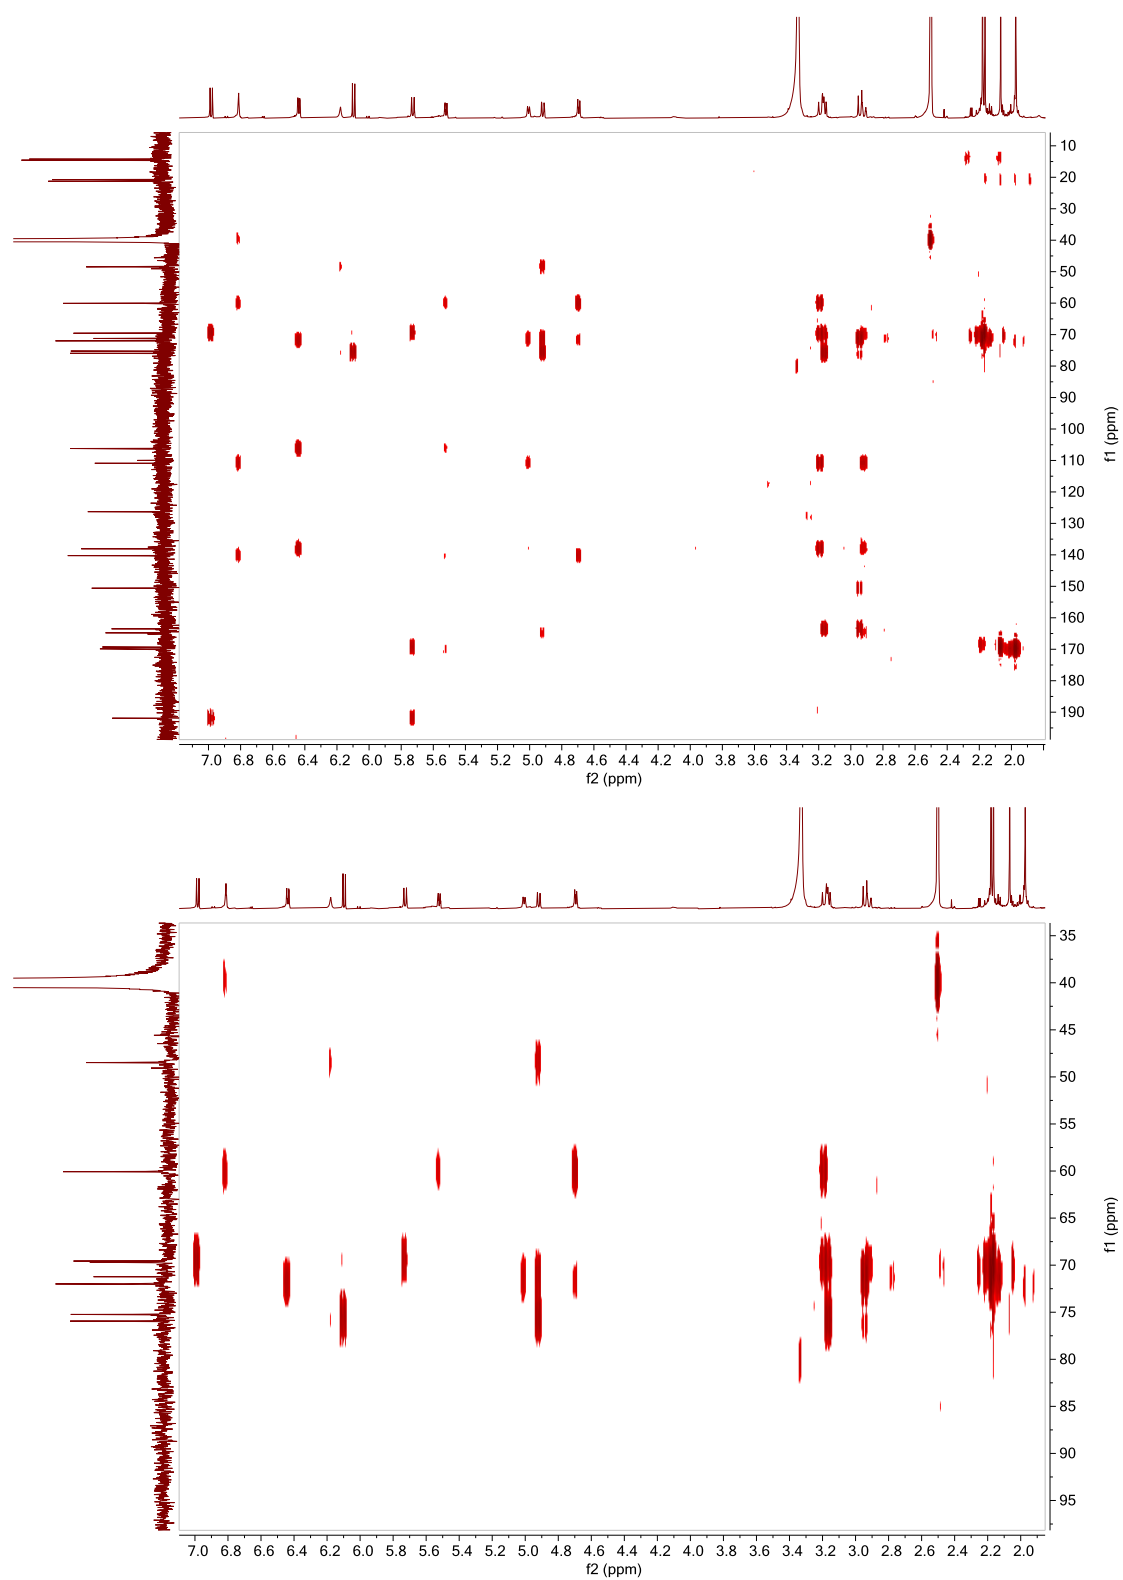

**Figure S33** NOESY spectrum of compound **4** in DMSO-*d*<sub>6</sub>

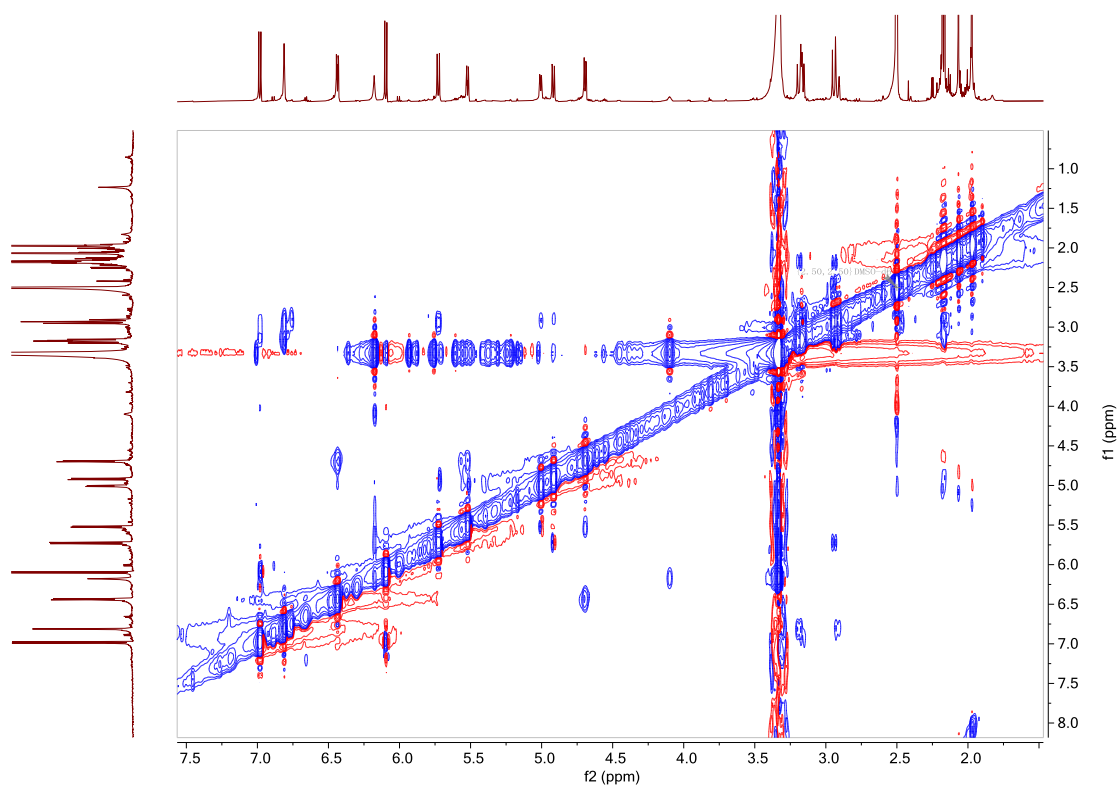

**Figure S34** HR-ESIMS spectrum of compound **4**

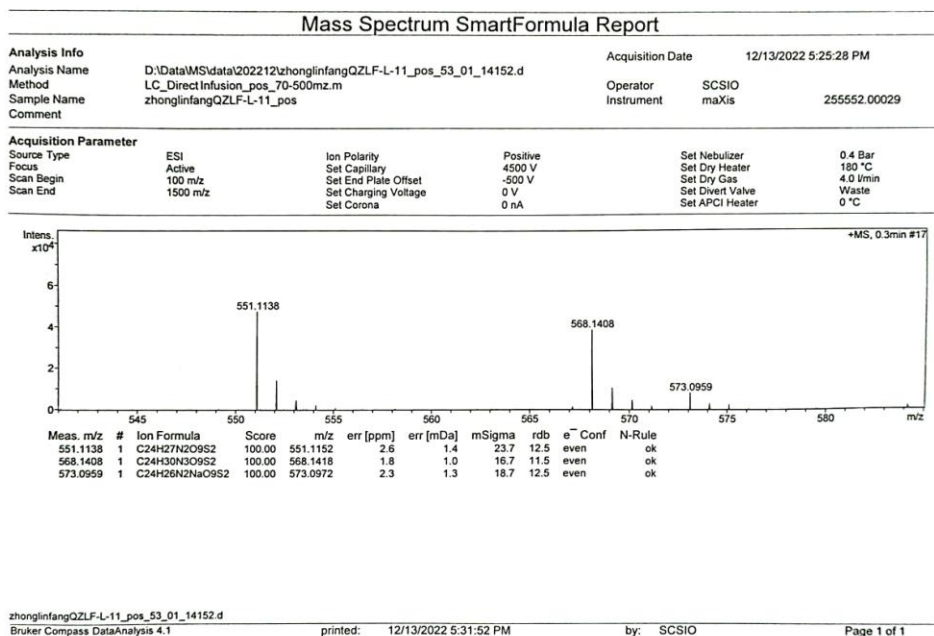

Figure S35 IR spectrum of compound 4

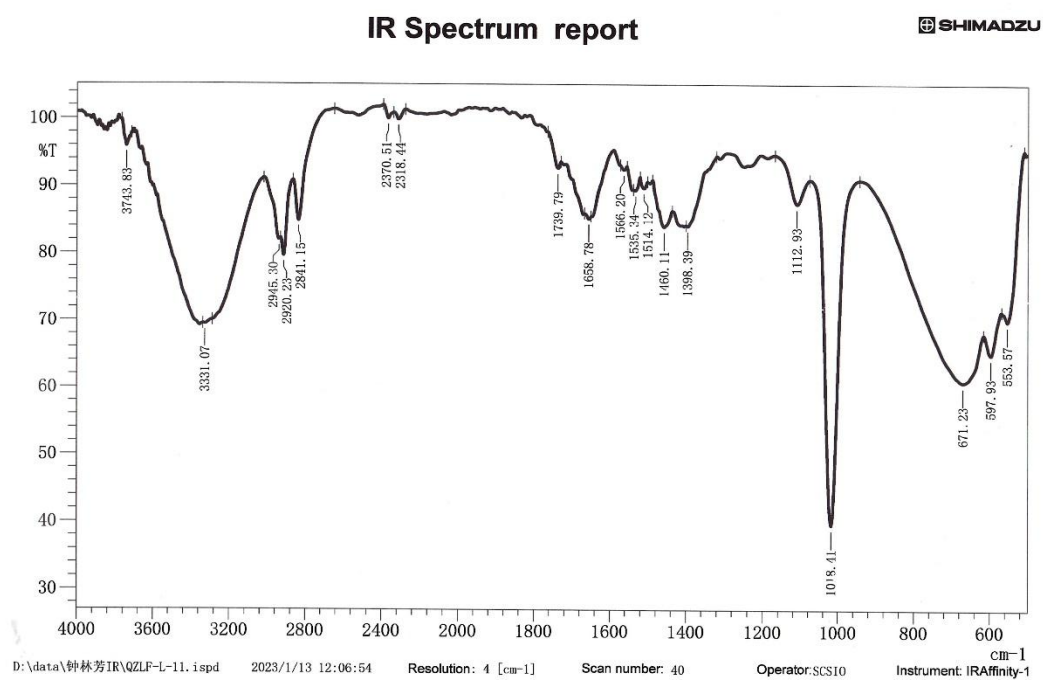

Figure S36 UV spectrum of compound 4

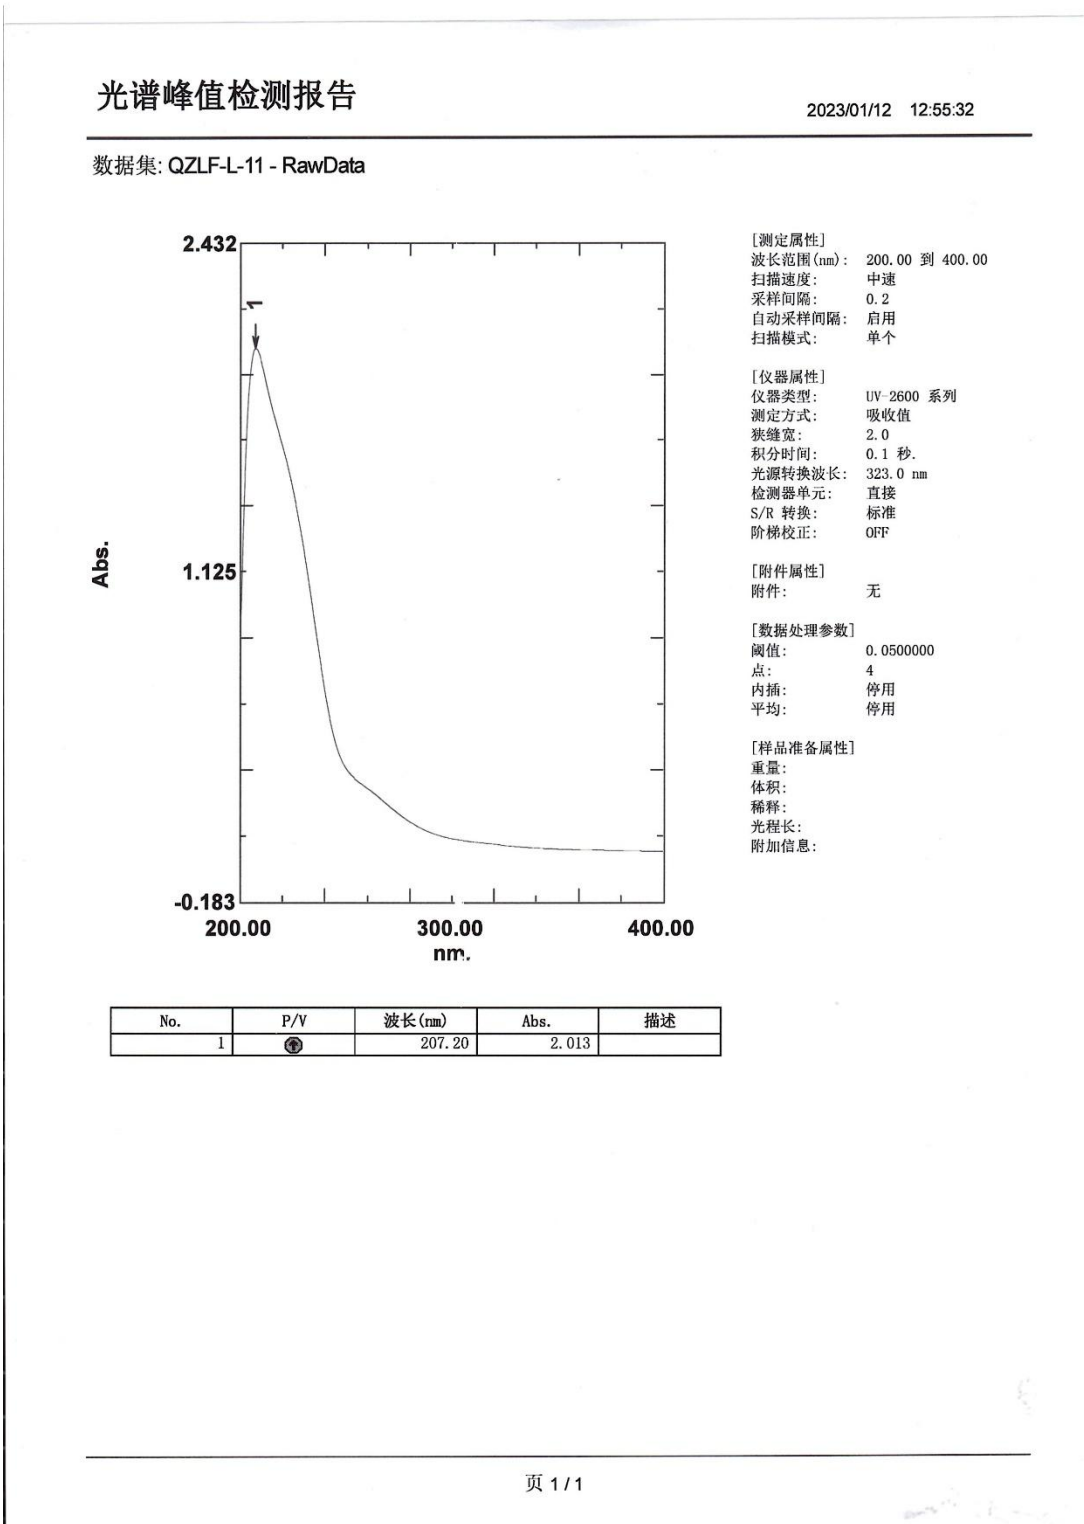

**Figure S37**  $^1\text{H}$  NMR spectrum of compound **5** in  $\text{DMSO}-d_6$

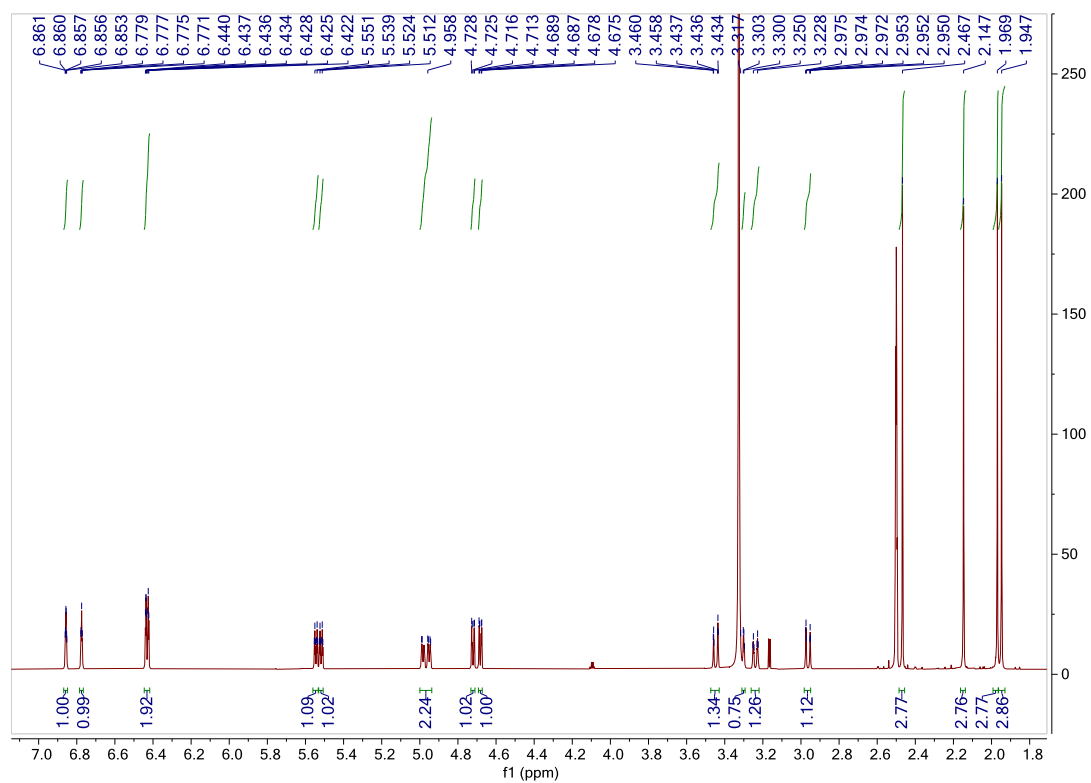

**Figure S38**  $^{13}\text{C}$  NMR spectrum of compound **5** in  $\text{DMSO-}d_6$

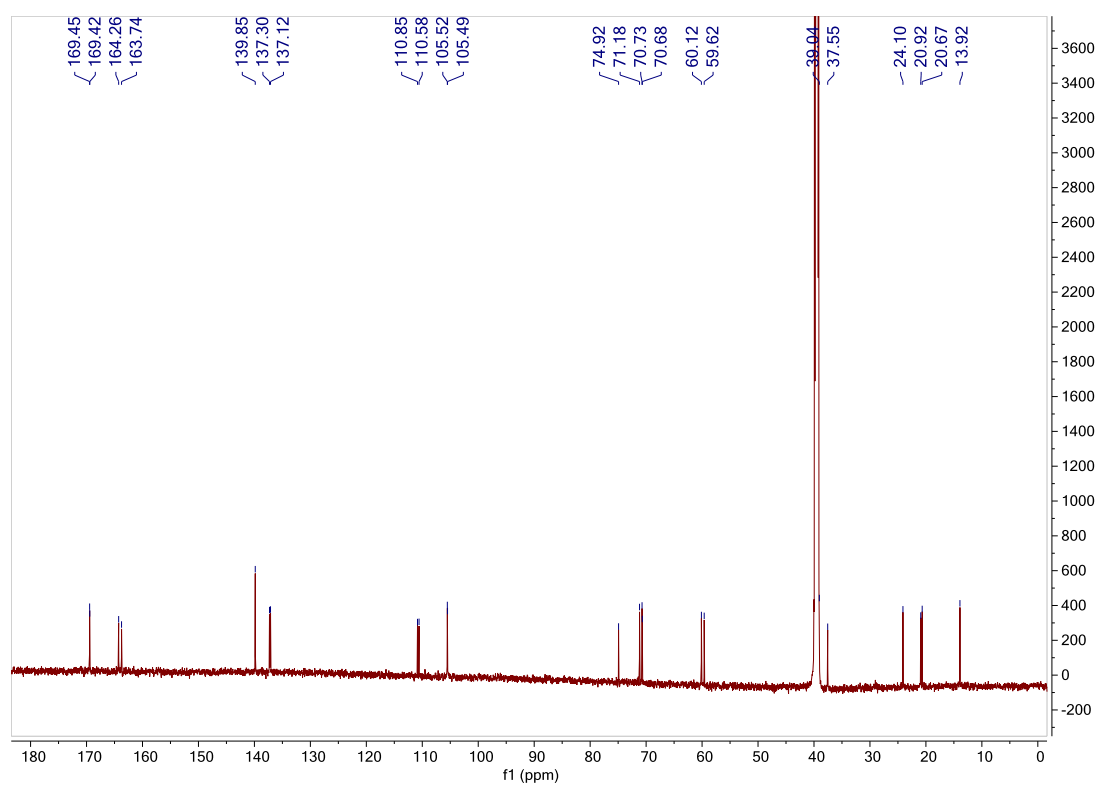



**Figure S39**  $^1\text{H}$ - $^1\text{H}$  COSY spectrum of compound **5** in  $\text{DMSO-}d_6$

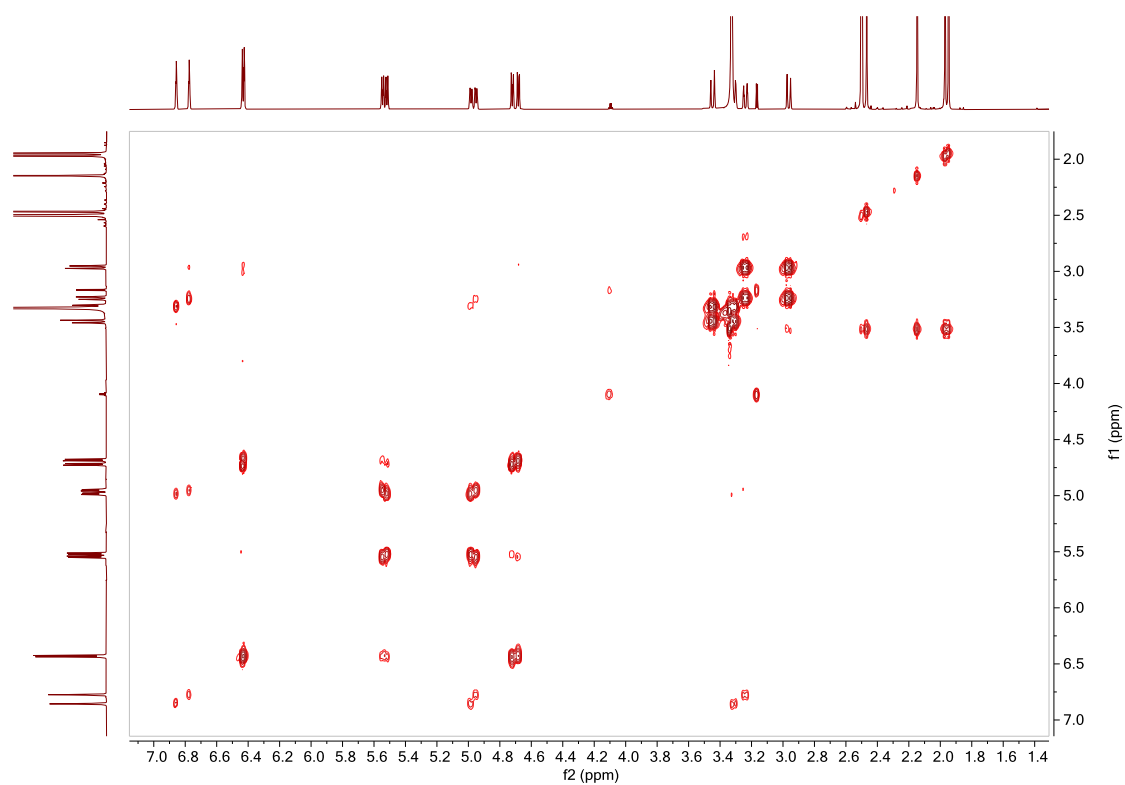

**Figure S40** HSQC spectrum of compound **5** in  $\text{DMSO-}d_6$

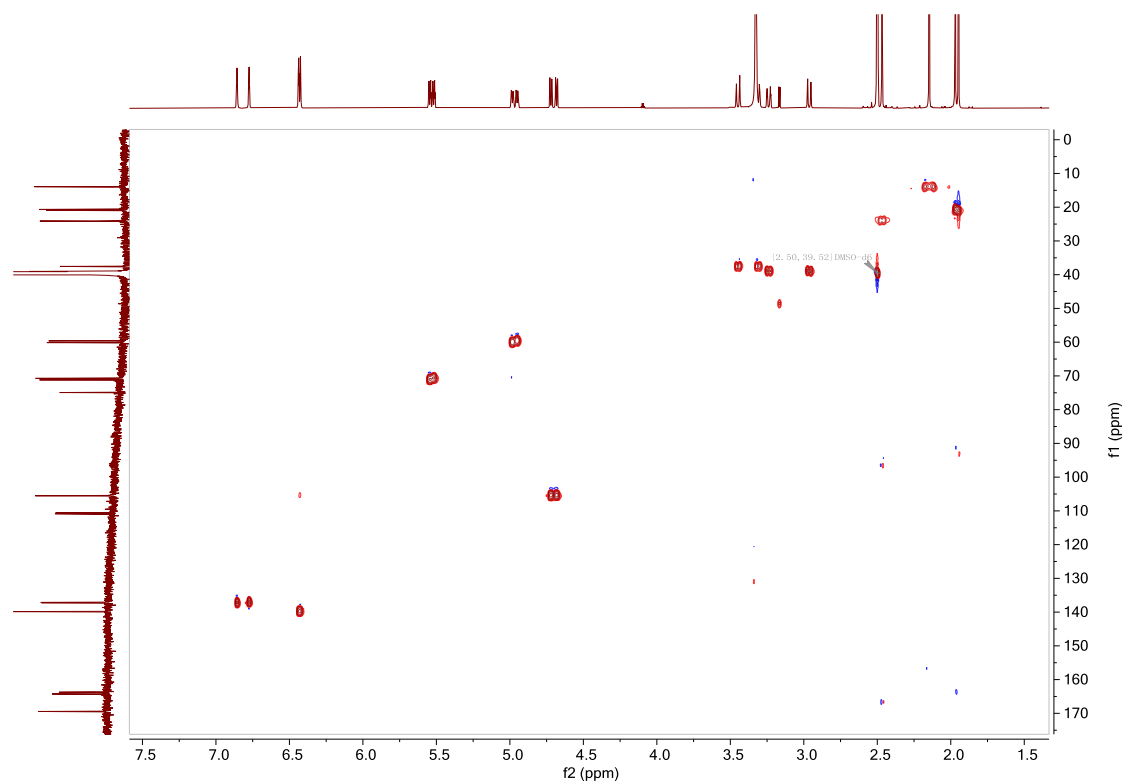

**Figure S41** HMBC spectrum of compound **5** in DMSO- $d_6$

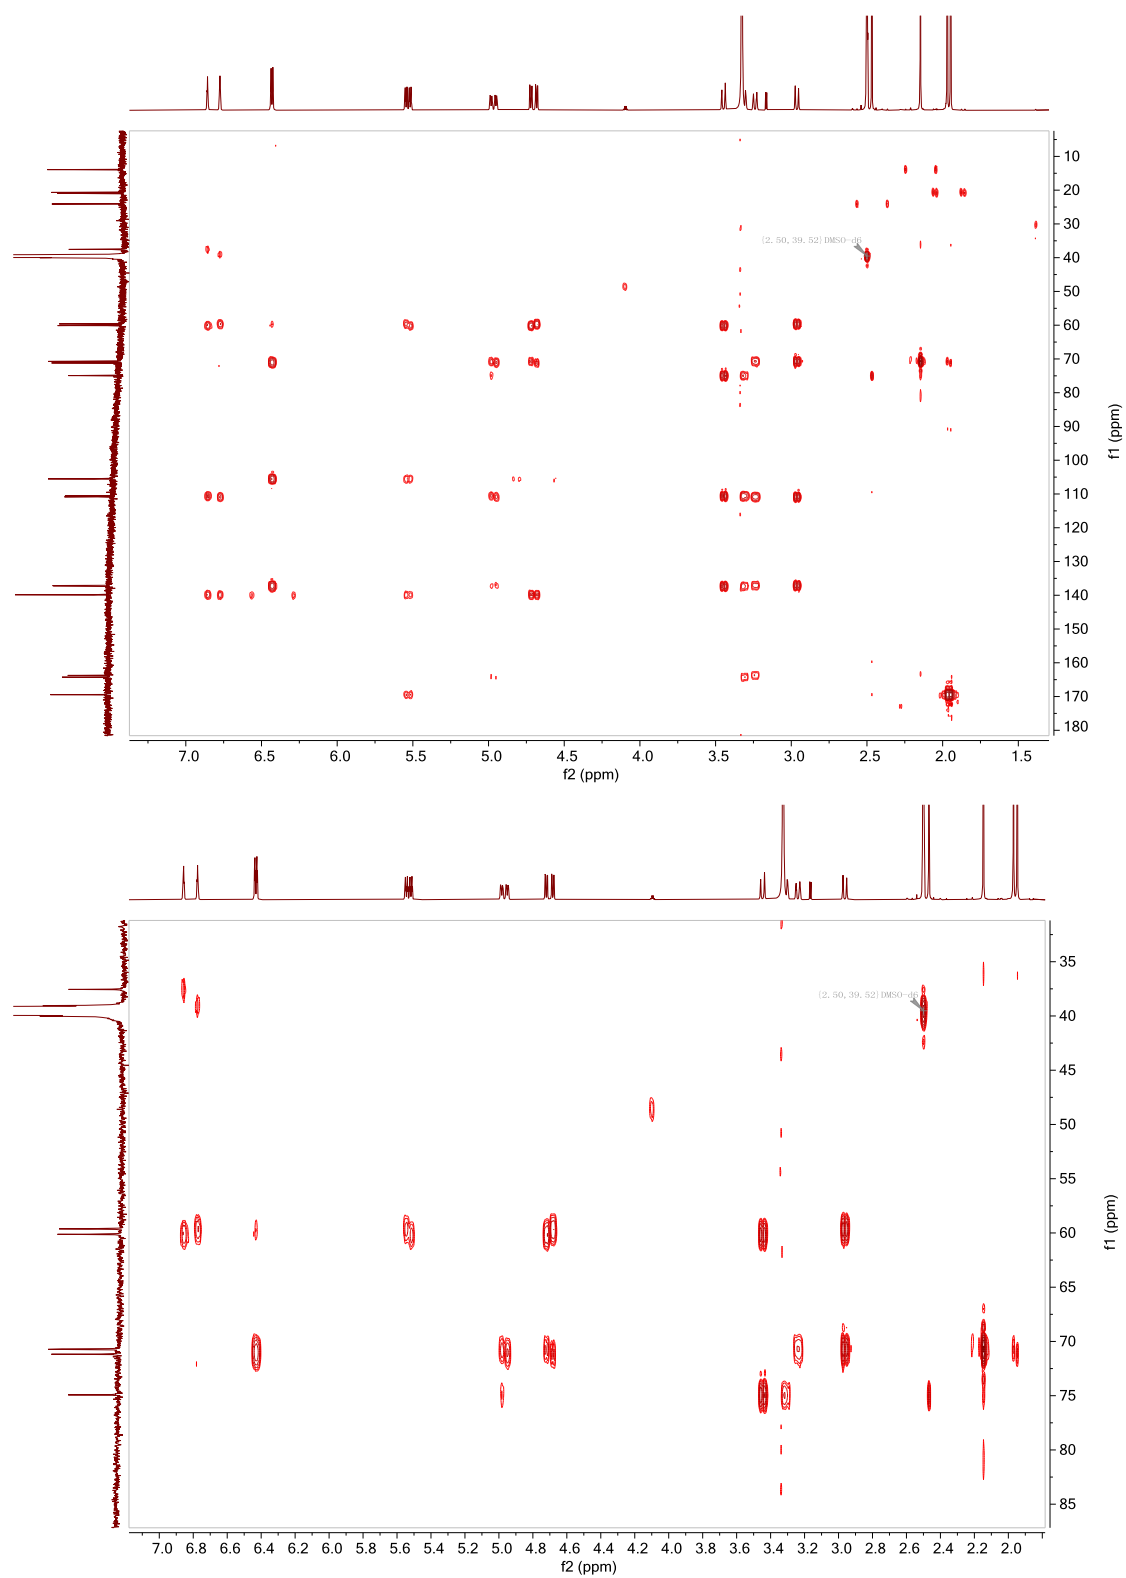

Figure S42 NOESY spectrum of compound **5** in DMSO-*d*<sub>6</sub>

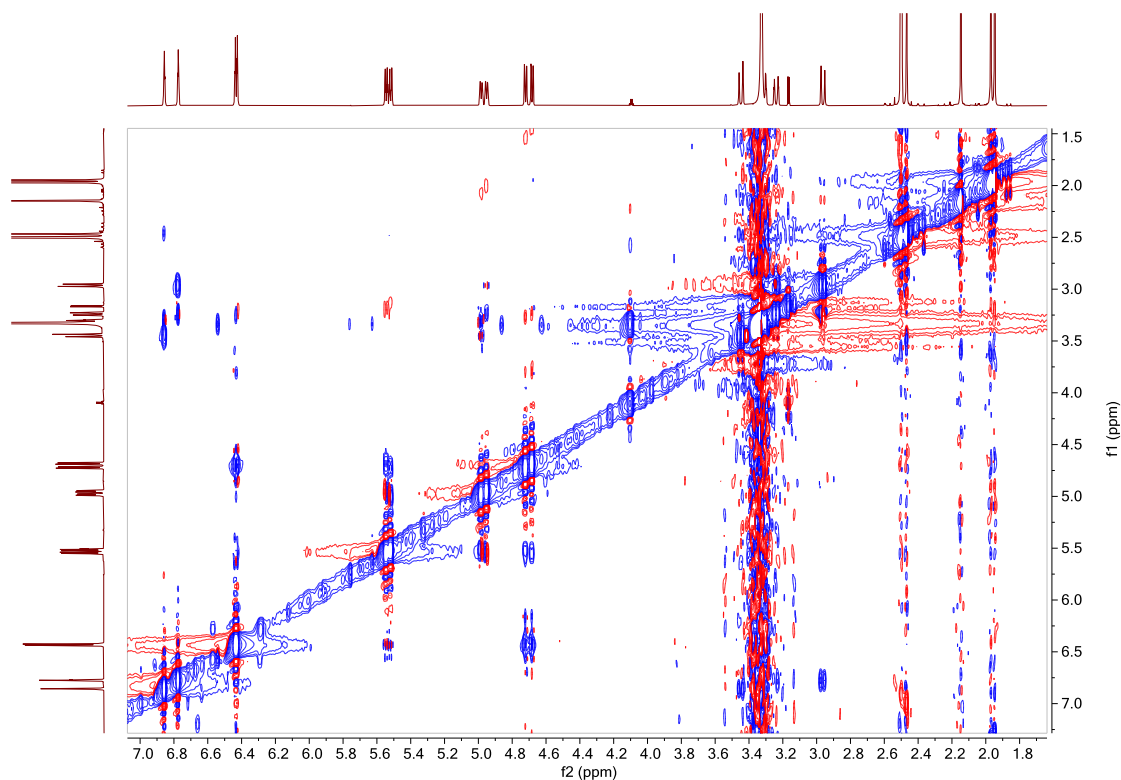

Figure S43 HR-ESIMS spectrum of compound **5**

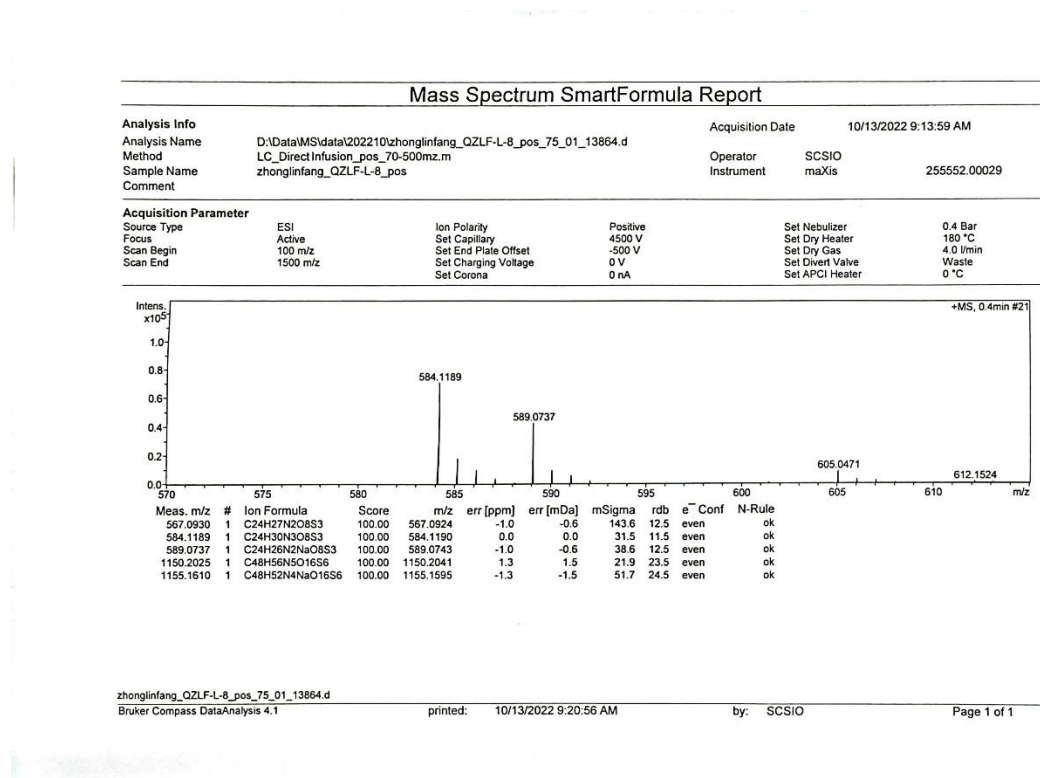

**Figure S44** IR spectrum of compound **5**

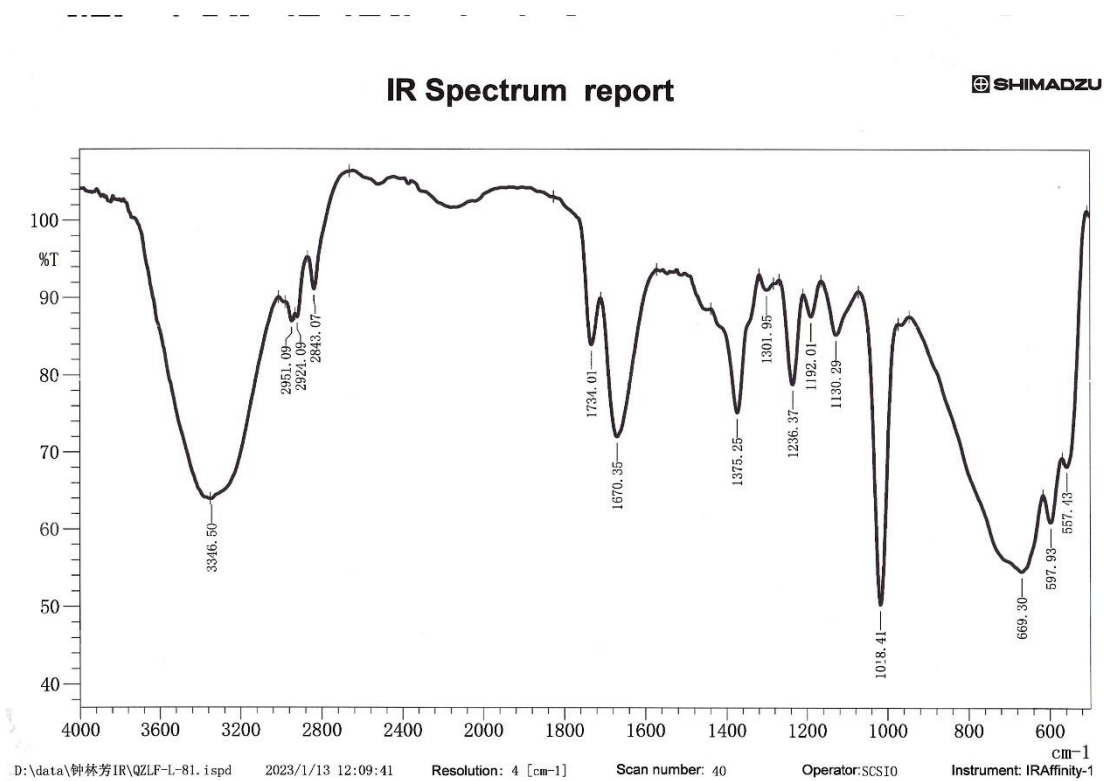

Figure S45 UV spectrum of compound 5

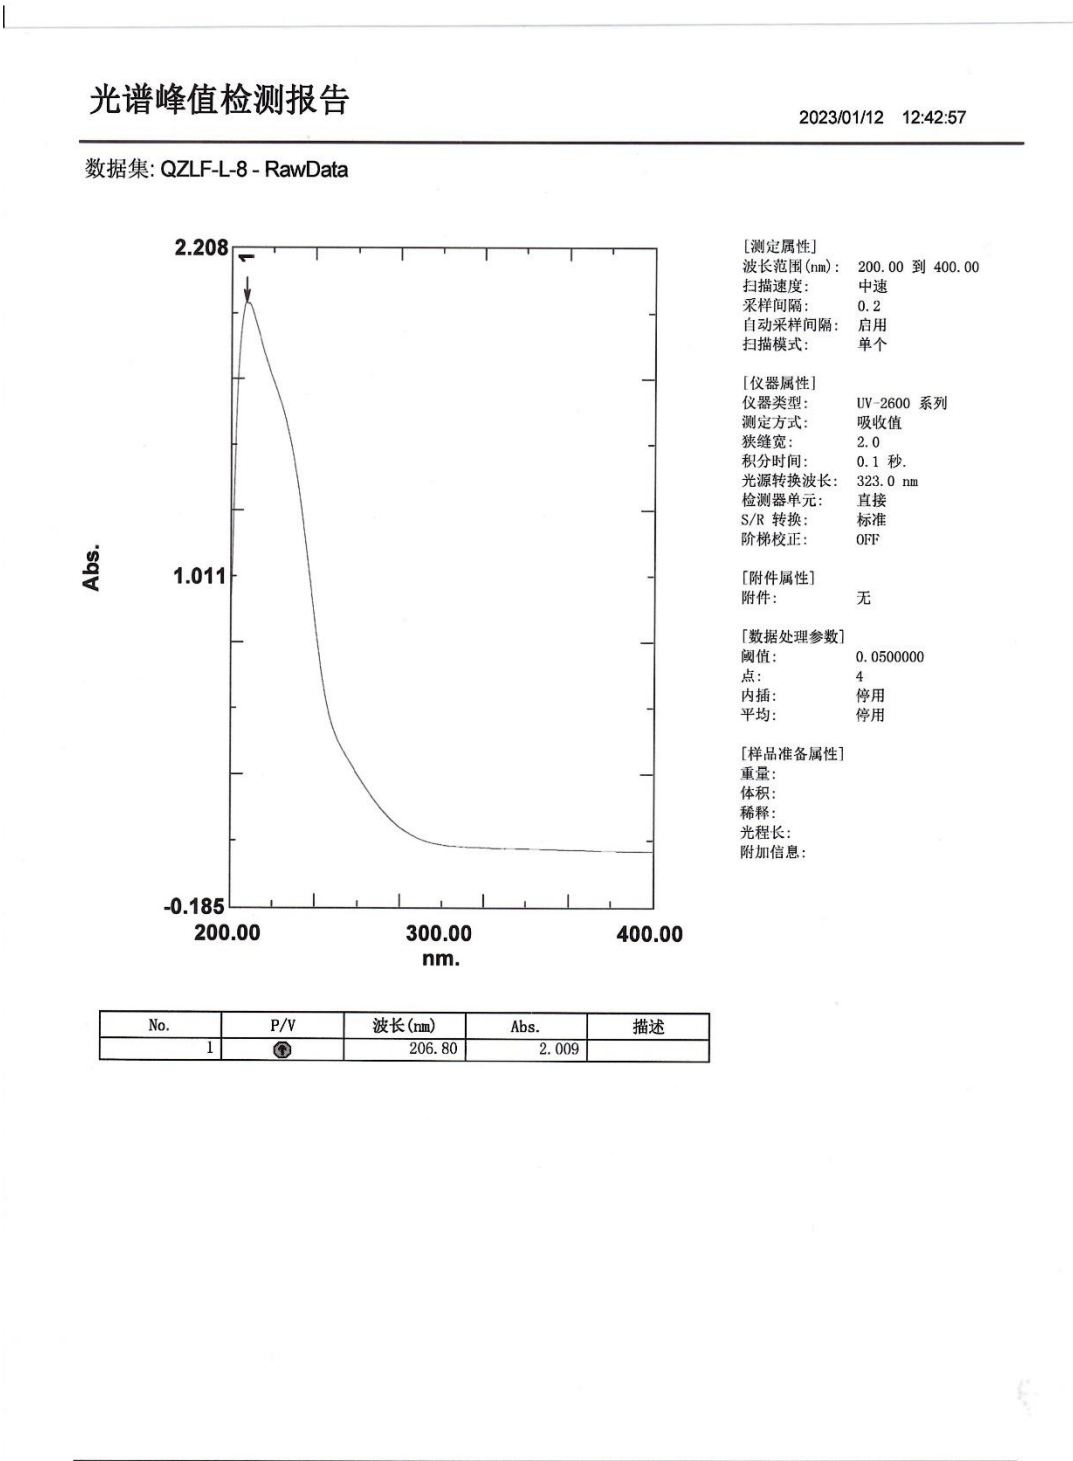

**Figure S46**  $^1\text{H}$  NMR spectrum of compound **6** in  $\text{DMSO}-d_6$

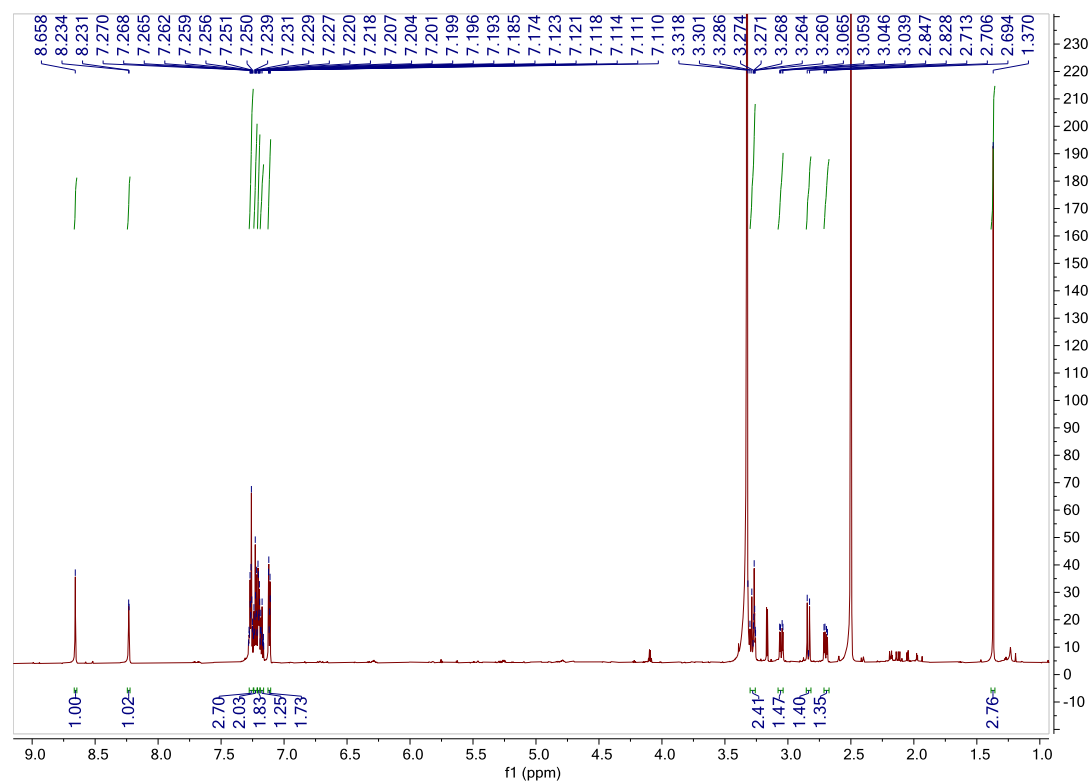

**Figure S47**  $^{13}\text{C}$  NMR spectrum of compound **6** in  $\text{DMSO-}d_6$

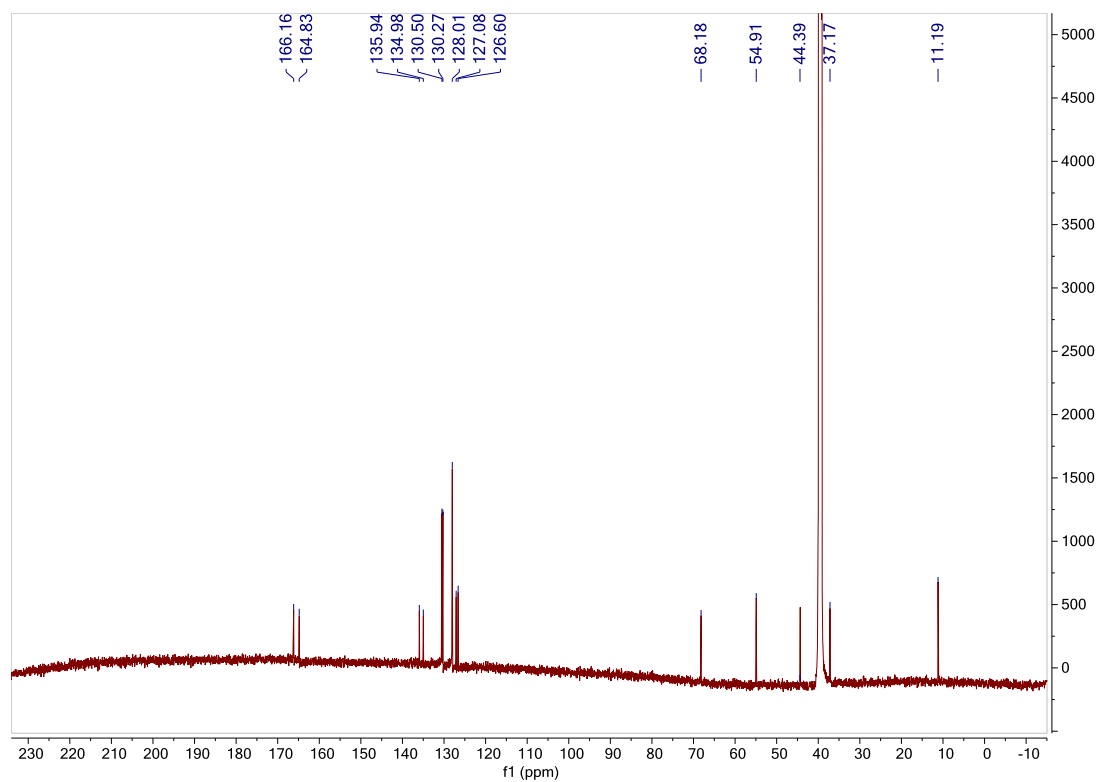

**Figure S48**  $^1\text{H}$ - $^1\text{H}$  COSY spectrum of compound **6** in  $\text{DMSO-}d_6$

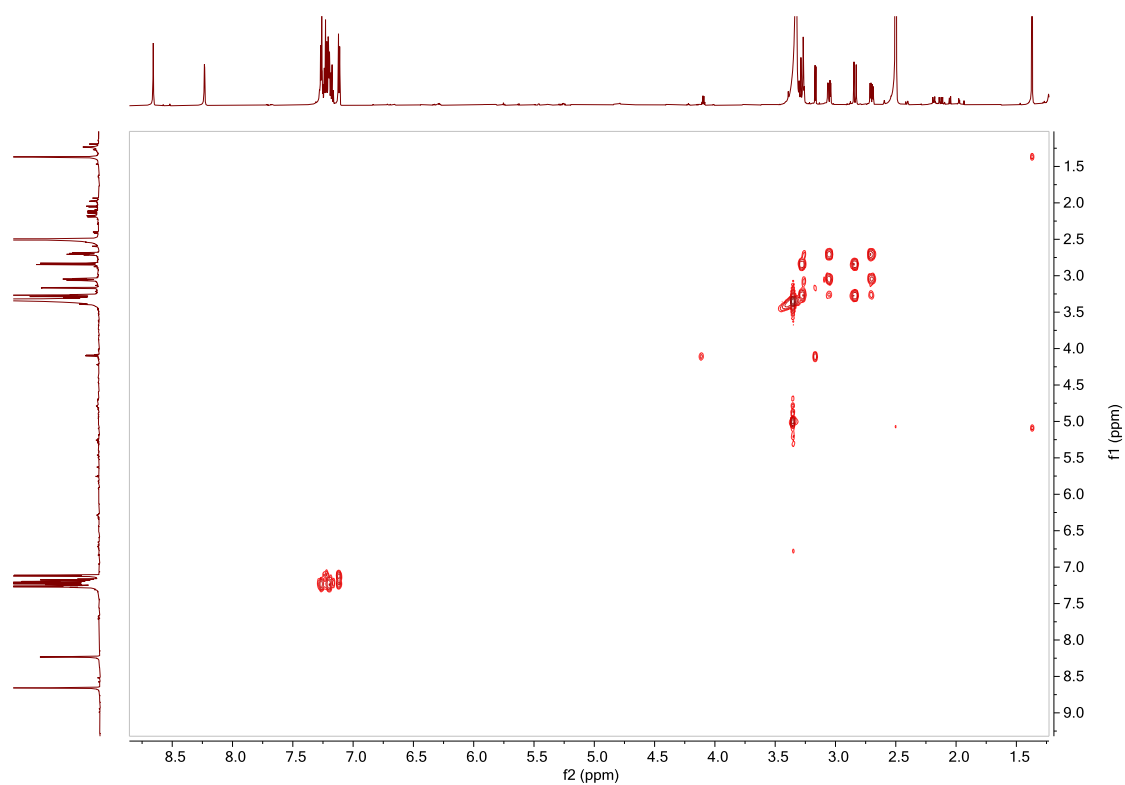

**Figure S49** HSQC spectrum of compound **6** in  $\text{DMSO-}d_6$

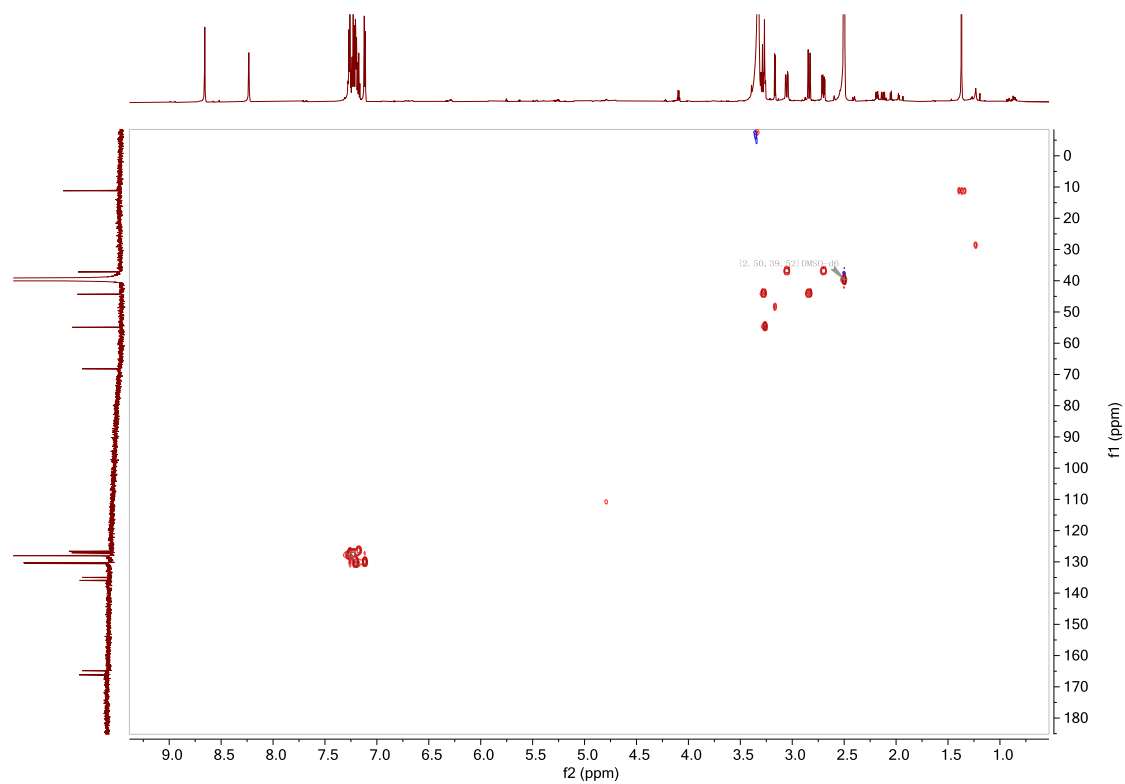



**Figure S50** HMBC spectrum of compound **6** in DMSO- $d_6$

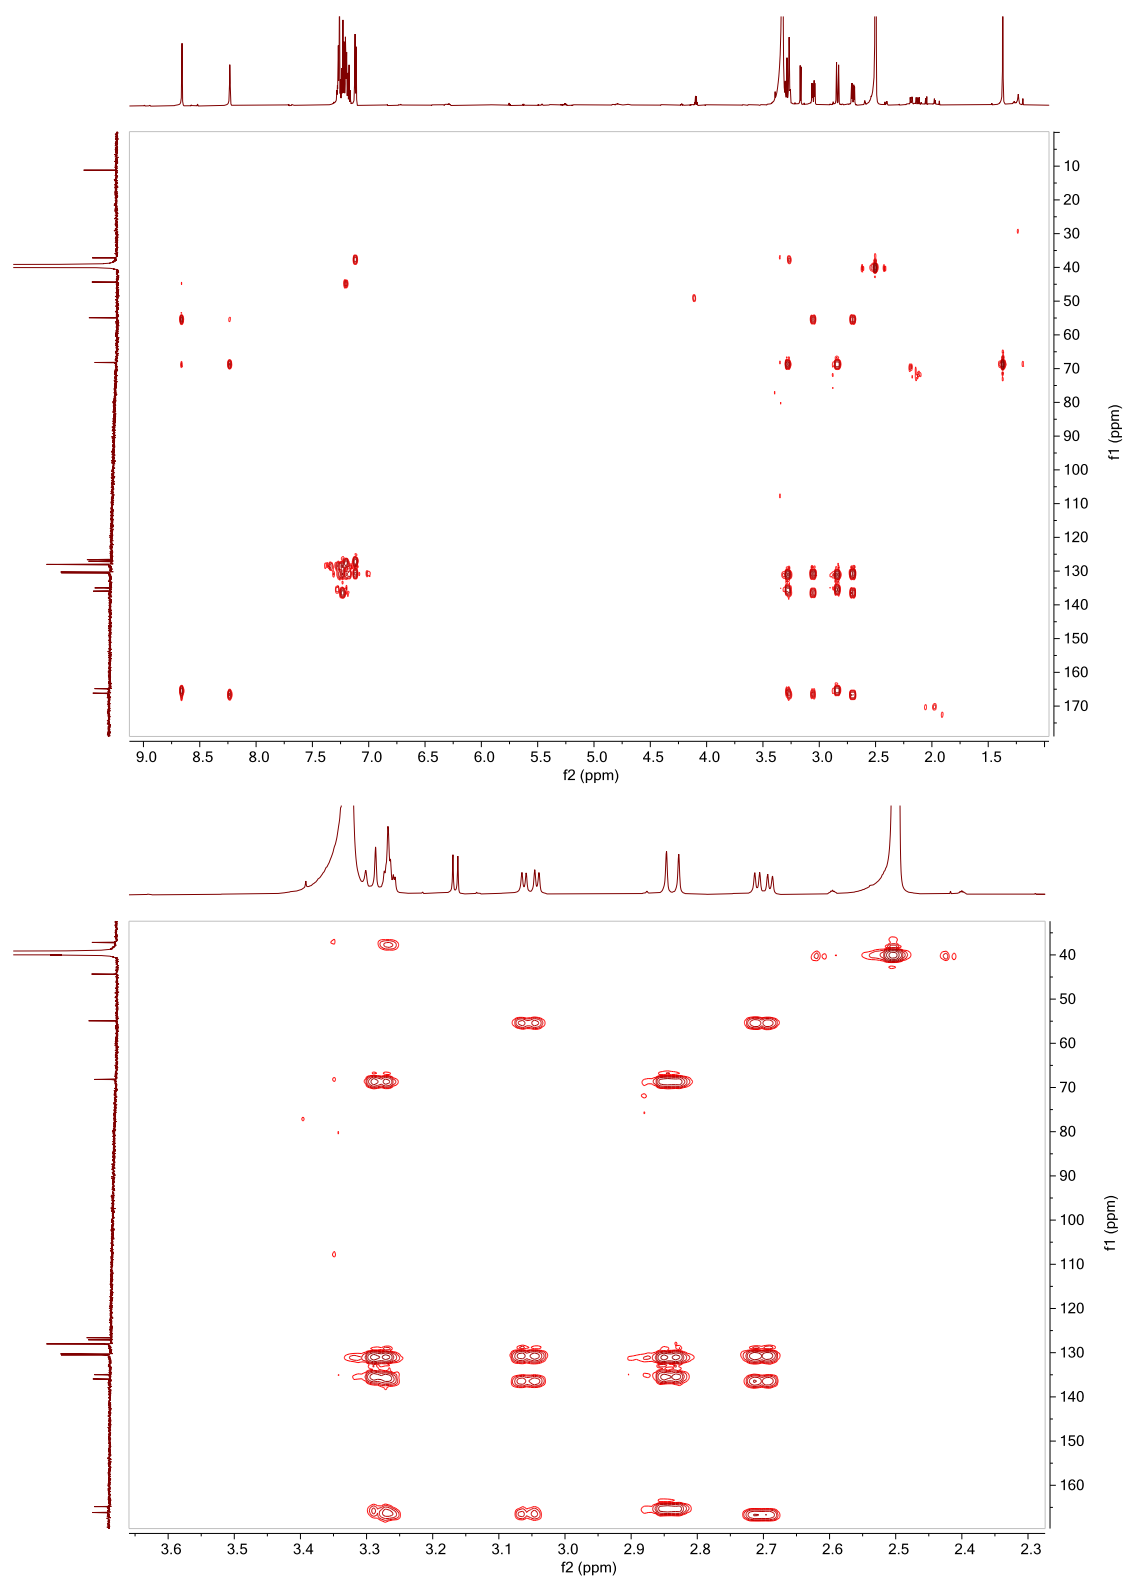

**Figure S51** NOESY spectrum of compound **6** in DMSO- $d_6$

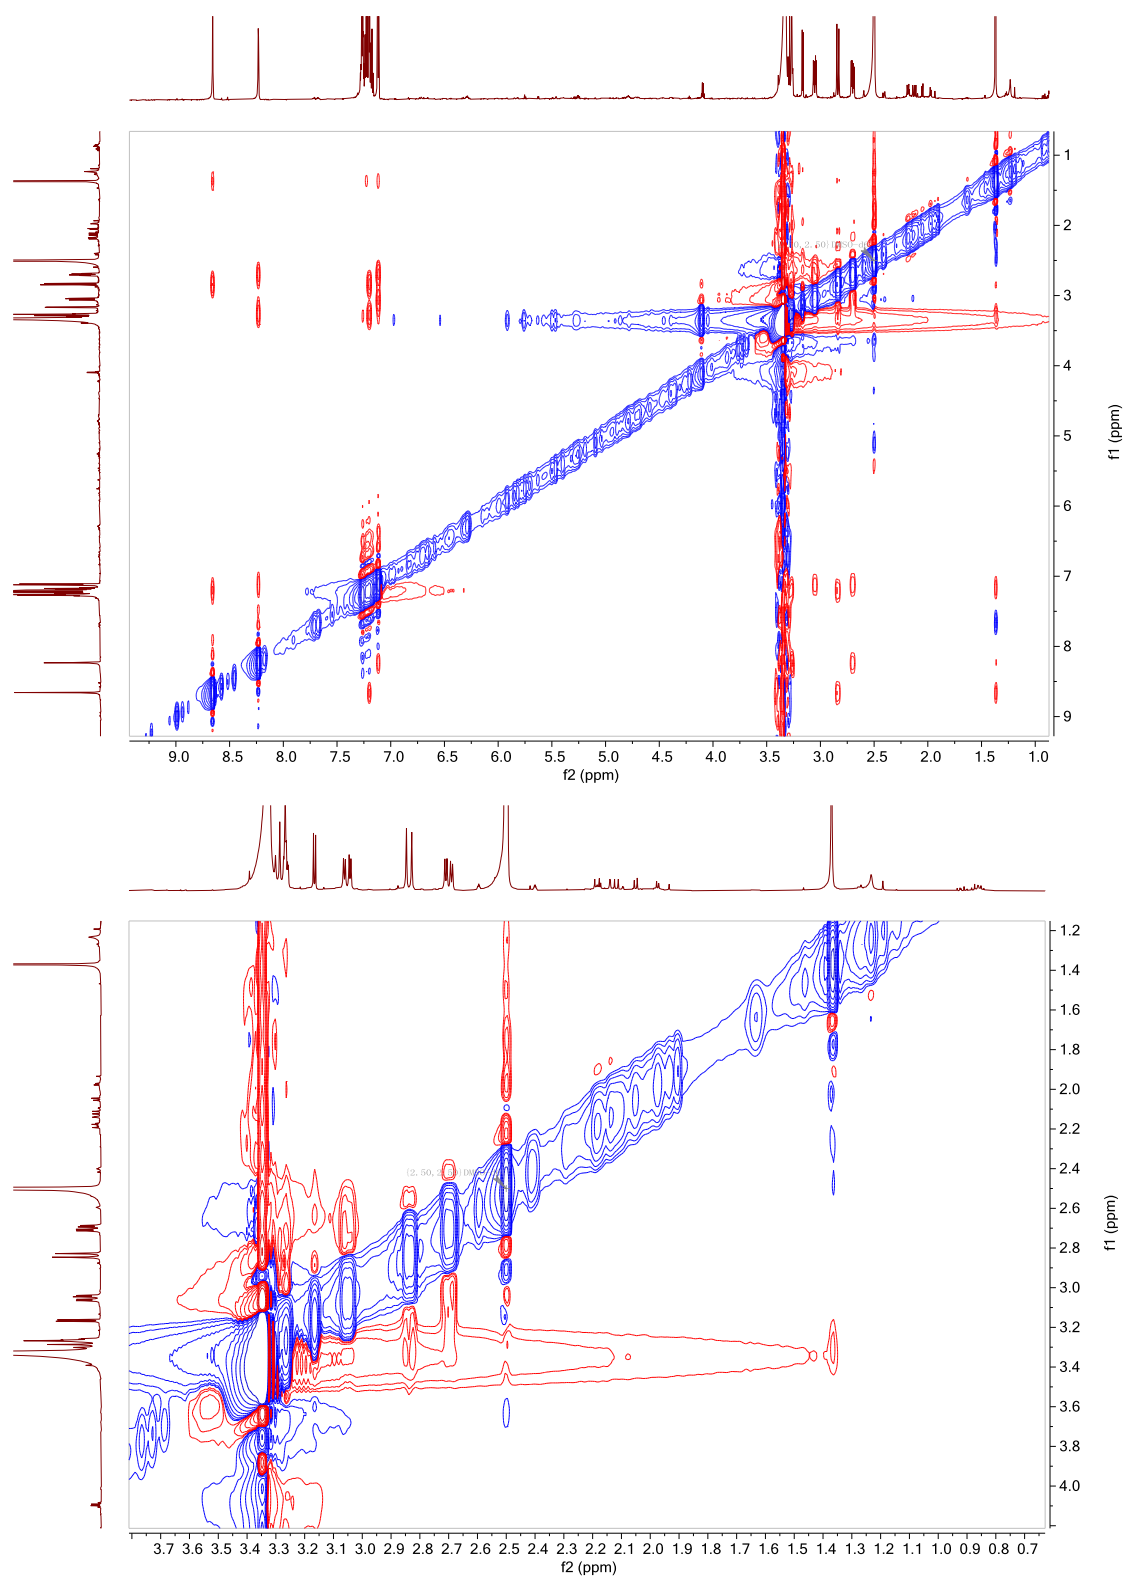

**Figure S52** HR-ESIMS spectrum of compound **6**

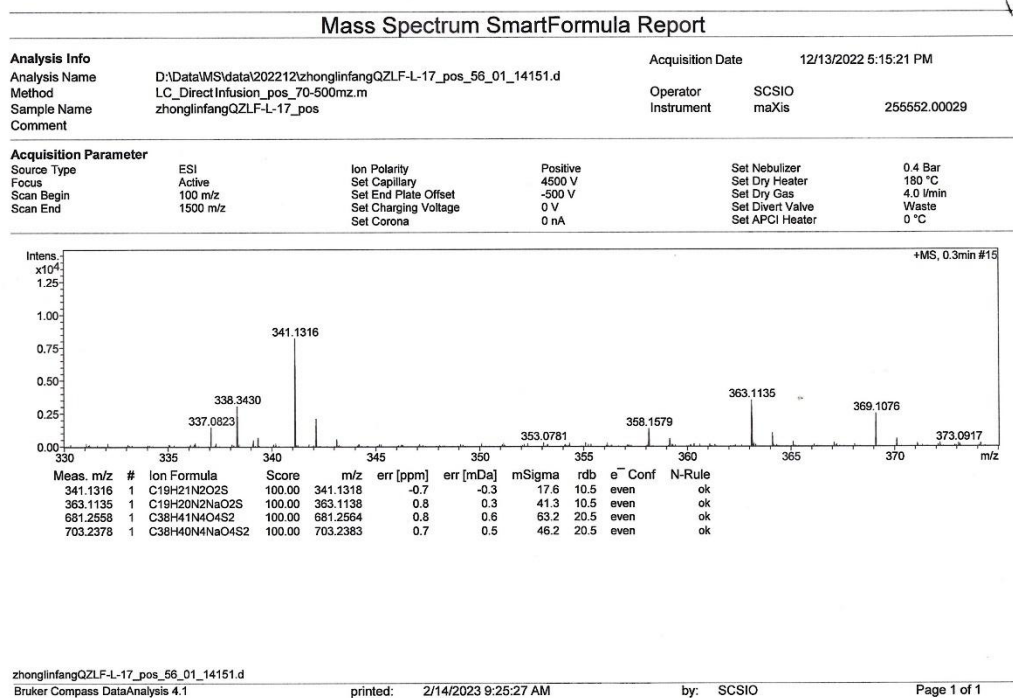

Figure S53 IR spectrum of compound 6

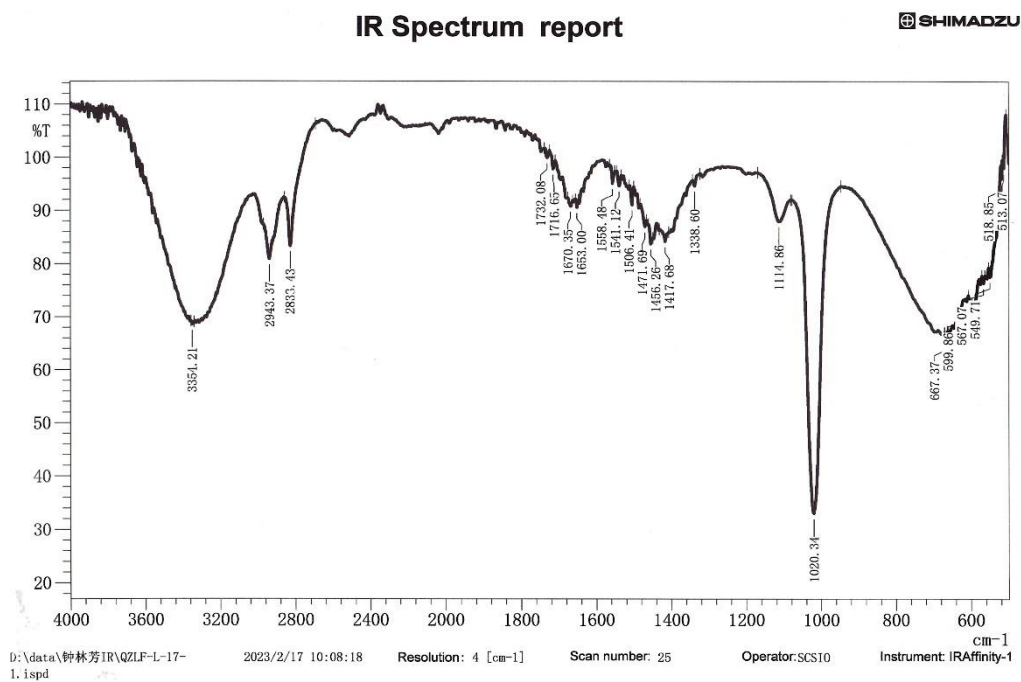

**Figure S54** UV spectrum of compound **6**

# 光谱峰值检测报告

2023/02/17 11:38:57

数据集: QZLF-L-17 - RawData

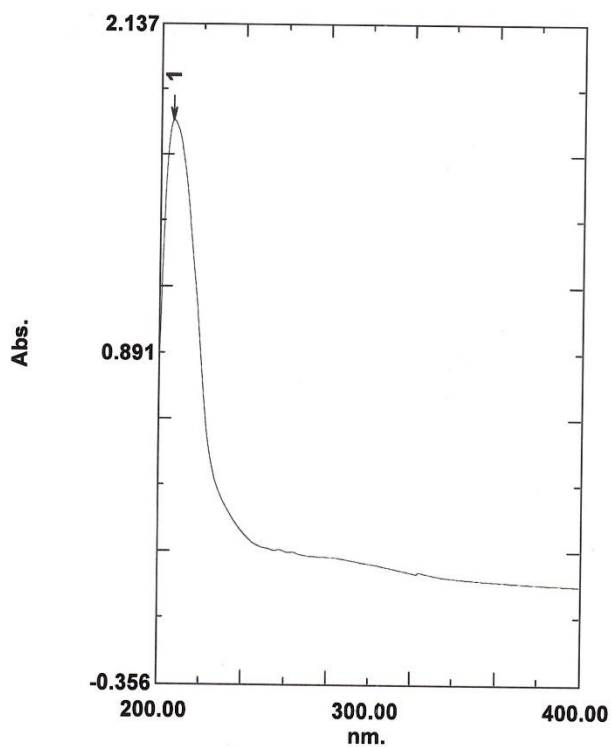

[测定属性]  
 波长范围 (nm): 200.00 到 400.00  
 扫描速度: 中速  
 采样间隔: 0.2  
 自动采样间隔: 启用  
 扫描模式: 单个

[仪器属性]  
 仪器类型: UV-2600 系列  
 测定方式: 吸收值  
 狭缝宽: 2.0  
 积分时间: 0.1 秒  
 光源转换波长: 323.0 nm  
 检测器单元: 直接  
 S/R 转换: 标准  
 阶梯校正: OFF

[附件属性]  
 附件: 无

[数据处理参数]  
 阈值: 0.0500000  
 点: 4  
 内插: 停用  
 平均: 停用

[样品准备属性]  
 重量:  
 体积:  
 稀释:  
 光程长:  
 附加信息:

| No. | P/V | 波长 (nm) | Abs.  | 描述 |
|-----|-----|---------|-------|----|
| 1   | ⑤   | 206.00  | 1.769 |    |

**Figure S55** X-ray crystallographic structure of compound **3**

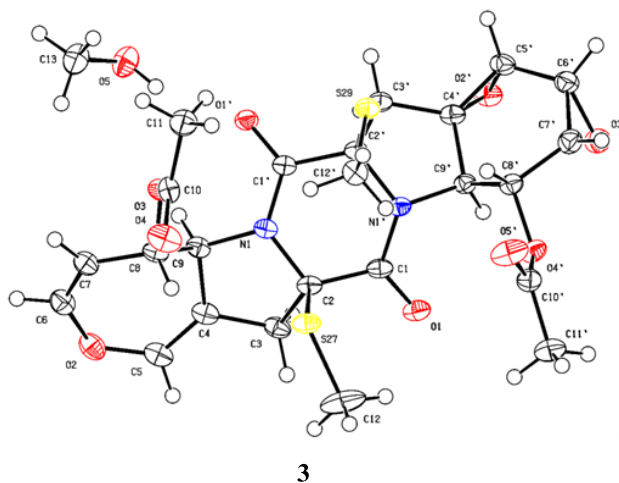

**Table S1.** Crystal Data and Structure Refinement for Compound **3**

|                                      |                                                                               |
|--------------------------------------|-------------------------------------------------------------------------------|
| Identification code                  | QZLF-L-13_collect                                                             |
| Empirical formula                    | C <sub>25</sub> H <sub>30</sub> N <sub>2</sub> O <sub>10</sub> S <sub>2</sub> |
| Formula weight                       | 582.63                                                                        |
| Temperature/K                        | 100.00(10)                                                                    |
| Crystal system                       | monoclinic                                                                    |
| Space group                          | P2 <sub>1</sub>                                                               |
| a/Å                                  | 7.14328(5)                                                                    |
| b/Å                                  | 16.25526(10)                                                                  |
| c/Å                                  | 11.41675(7)                                                                   |
| α/°                                  | 90                                                                            |
| β/°                                  | 93.4877(6)                                                                    |
| γ/°                                  | 90                                                                            |
| Volume/Å <sup>3</sup>                | 1323.211(14)                                                                  |
| Z                                    | 2                                                                             |
| ρ <sub>calc</sub> /g/cm <sup>3</sup> | 1.462                                                                         |
| μ/mm <sup>-1</sup>                   | 2.357                                                                         |
| F(000)                               | 612.0                                                                         |
| Crystal size/mm <sup>3</sup>         | 0.15 × 0.12 × 0.1                                                             |
| Radiation                            | Cu Kα (λ = 1.54184)                                                           |
| 2θ range for data collection/°       | 7.758 to 148.752                                                              |
| Index ranges                         | -8 ≤ h ≤ 8, -19 ≤ k ≤ 20, -14 ≤ l ≤ 14                                        |
| Reflections collected                | 25678                                                                         |

|                                                |                                                                  |
|------------------------------------------------|------------------------------------------------------------------|
| Independent reflections                        | 5292 [ $R_{\text{int}} = 0.0323$ , $R_{\text{sigma}} = 0.0216$ ] |
| Data/restraints/parameters                     | 5292/1/358                                                       |
| Goodness-of-fit on $F^2$                       | 1.075                                                            |
| Final R indexes [ $I \geq 2\sigma(I)$ ]        | $R_1 = 0.0242$ , $wR_2 = 0.0639$                                 |
| Final R indexes [all data]                     | $R_1 = 0.0244$ , $wR_2 = 0.0641$                                 |
| Largest diff. peak/hole / $e \text{ \AA}^{-3}$ | 0.23/-0.17                                                       |
| Flack parameter                                | -0.001(4)                                                        |

**Table S2** Relative thermal energies ( $\Delta E$ ), relative free energies ( $\Delta G$ ), and equilibrium populations (P) of low-energy conformers of structures **1-6** in MeOH or MeCN

| conformer                | $\Delta E(\text{kcal/mol})^a$ | $\Delta G(\text{kcal/mol})^a$ | $P(\%)^b$ | conformer                | $\Delta E(\text{kcal/mol})^a$ | $\Delta G(\text{kcal/mol})^a$ | $P(\%)^b$ |
|--------------------------|-------------------------------|-------------------------------|-----------|--------------------------|-------------------------------|-------------------------------|-----------|
| structure <b>1</b>       | -                             | -                             | -         | <b>4-13</b> <sup>c</sup> | 6.08                          | 4.83                          | 0.00      |
| <b>1-1</b>               | 0.00                          | 0.00                          | 0.45      | <b>4-14</b>              | 1.40                          | 1.37                          | 0.02      |
| <b>1-2</b>               | 0.27                          | 0.24                          | 0.30      | structure <b>5</b>       | -                             | -                             | -         |
| <b>1-3</b>               | 0.29                          | 0.34                          | 0.25      | <b>5-1</b>               | 1.42                          | 2.09                          | 0.01      |
| structure <b>2</b>       | -                             | -                             | -         | <b>5-2</b> <sup>c</sup>  | 1.02                          | 2.35                          | 0.00      |
| <b>2-1</b>               | 0.00                          | 0.00                          | 0.97      | <b>5-3</b>               | 0.56                          | 1.77                          | 0.02      |
| <b>2-2</b>               | 4.57                          | 4.50                          | 0.01      | <b>5-4</b>               | 0.71                          | 2.06                          | 0.01      |
| <b>2-3</b>               | 0.82                          | 2.27                          | 0.02      | <b>5-5</b>               | 0.93                          | 0.00                          | 0.37      |
| structure <b>3</b>       | -                             | -                             | -         | <b>5-6</b> <sup>c</sup>  | 5.07                          | 6.59                          | 0.00      |
| <b>3-1</b>               | 2.20                          | 2.40                          | 0.01      | <b>5-7</b>               | 0.90                          | 1.53                          | 0.03      |
| <b>3-2</b>               | 1.37                          | 1.85                          | 0.03      | <b>5-8</b> <sup>c</sup>  | 4.16                          | 4.98                          | 0.00      |
| <b>3-3</b> <sup>c</sup>  | 3.80                          | 3.76                          | 0.00      | <b>5-9</b>               | 0.00                          | 0.01                          | 0.36      |
| <b>3-4</b> <sup>c</sup>  | 2.57                          | 3.18                          | 0.00      | <b>5-10</b>              | 0.90                          | 1.53                          | 0.03      |
| <b>3-5</b>               | 3.26                          | 2.32                          | 0.01      | <b>5-11</b>              | 0.55                          | 1.76                          | 0.02      |
| <b>3-6</b>               | 0.00                          | 1.32                          | 0.07      | <b>5-12</b>              | 0.31                          | 1.32                          | 0.04      |
| <b>3-7</b>               | 1.21                          | 2.20                          | 0.02      | <b>5-13</b> <sup>c</sup> | 4.53                          | 3.73                          | 0.00      |
| <b>3-8</b>               | 0.86                          | 0.00                          | 0.69      | <b>5-14</b>              | 1.05                          | 1.51                          | 0.03      |
| <b>3-9</b> <sup>c</sup>  | 5.21                          | 4.10                          | 0.00      | <b>5-15</b>              | 0.81                          | 0.92                          | 0.08      |
| <b>3-10</b>              | 0.46                          | 1.40                          | 0.06      | structure <b>6</b>       | -                             | -                             | -         |
| <b>3-11</b> <sup>c</sup> | 3.80                          | 3.76                          | 0.00      | <b>6-1</b>               | 2.15                          | 2.42                          | 0.01      |
| <b>3-12</b>              | 0.46                          | 1.39                          | 0.07      | <b>6-2</b>               | 2.11                          | 2.19                          | 0.01      |
| <b>3-13</b>              | 1.36                          | 1.85                          | 0.03      | <b>6-3</b>               | 2.11                          | 2.19                          | 0.01      |
| structure <b>4</b>       | -                             | -                             | -         | <b>6-4</b> <sup>c</sup>  | 2.45                          | 2.76                          | 0.00      |
| <b>4-1</b>               | 1.79                          | 1.06                          | 0.04      | <b>6-5</b> <sup>c</sup>  | 2.61                          | 2.89                          | 0.00      |
| <b>4-2</b>               | 0.00                          | 0.04                          | 0.23      | <b>6-6</b>               | 0.00                          | 0.00                          | 0.37      |
| <b>4-3</b>               | 1.95                          | 1.06                          | 0.04      | <b>6-7</b>               | 1.04                          | 0.00                          | 0.37      |
| <b>4-4</b>               | 1.79                          | 1.06                          | 0.04      | <b>6-8</b>               | 0.17                          | 0.40                          | 0.19      |
| <b>4-5</b>               | 0.25                          | 0.00                          | 0.25      | <b>6-9</b>               | 2.08                          | 1.70                          | 0.02      |



|                          |      |      |      |                          |      |      |      |
|--------------------------|------|------|------|--------------------------|------|------|------|
| <b>4-6</b>               | 0.00 | 0.03 | 0.24 | <b>6-10</b> <sup>c</sup> | 3.32 | 3.69 | 0.00 |
| <b>4-7</b>               | 1.79 | 1.06 | 0.04 | <b>6-11</b> <sup>c</sup> | 2.82 | 2.74 | 0.00 |
| <b>4-8</b> <sup>c</sup>  | 4.50 | 4.45 | 0.00 | <b>6-12</b>              | 2.16 | 2.42 | 0.01 |
| <b>4-9</b>               | 2.18 | 2.00 | 0.01 | <b>6-13</b> <sup>c</sup> | 5.60 | 5.60 | 0.00 |
| <b>4-10</b>              | 1.38 | 1.11 | 0.04 | <b>6-14</b> <sup>c</sup> | 3.57 | 3.95 | 0.00 |
| <b>4-11</b> <sup>c</sup> | 2.92 | 2.85 | 0.00 | <b>6-15</b> <sup>c</sup> | 3.22 | 3.22 | 0.00 |
| <b>4-12</b>              | 1.95 | 1.06 | 0.04 | -                        | -    | -    | -    |

<sup>a</sup> At the M06-2X/def2-TZVP/ SMD level of theory.

<sup>b</sup> From  $\Delta G$  values at 298.15 K.

<sup>c</sup> Conformer not applied to ECD/TDDFT calculations.

**Figure S56** Conformations of low-energy conformers of structure **1** in MeOH

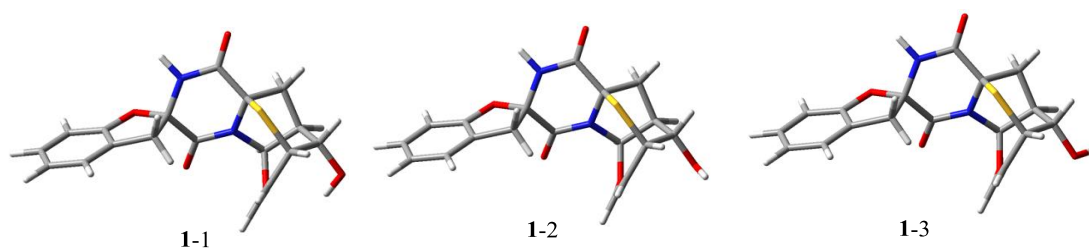

**Figure S57** Conformations of low-energy conformers of structure **2** in MeOH

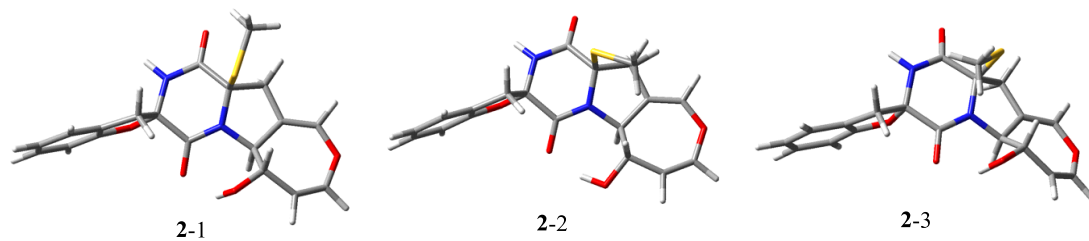

**Figure S58** Conformations of low-energy conformers of structure **3** in CH<sub>3</sub>CN

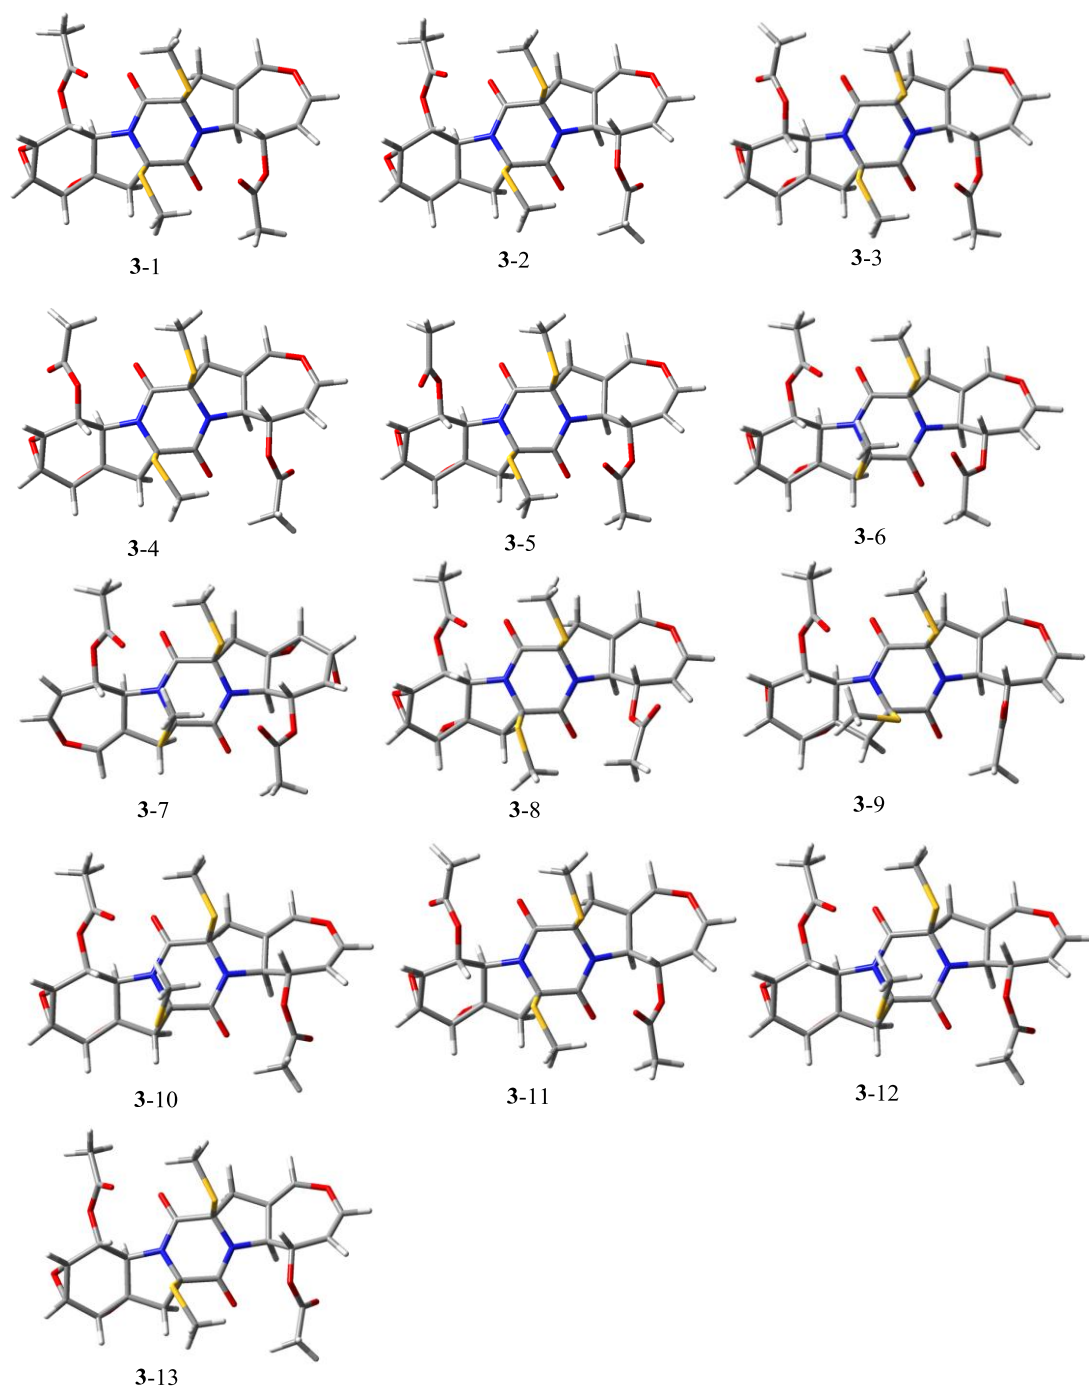

**Figure S59** Conformations of low-energy conformers of structure **4** in MeOH

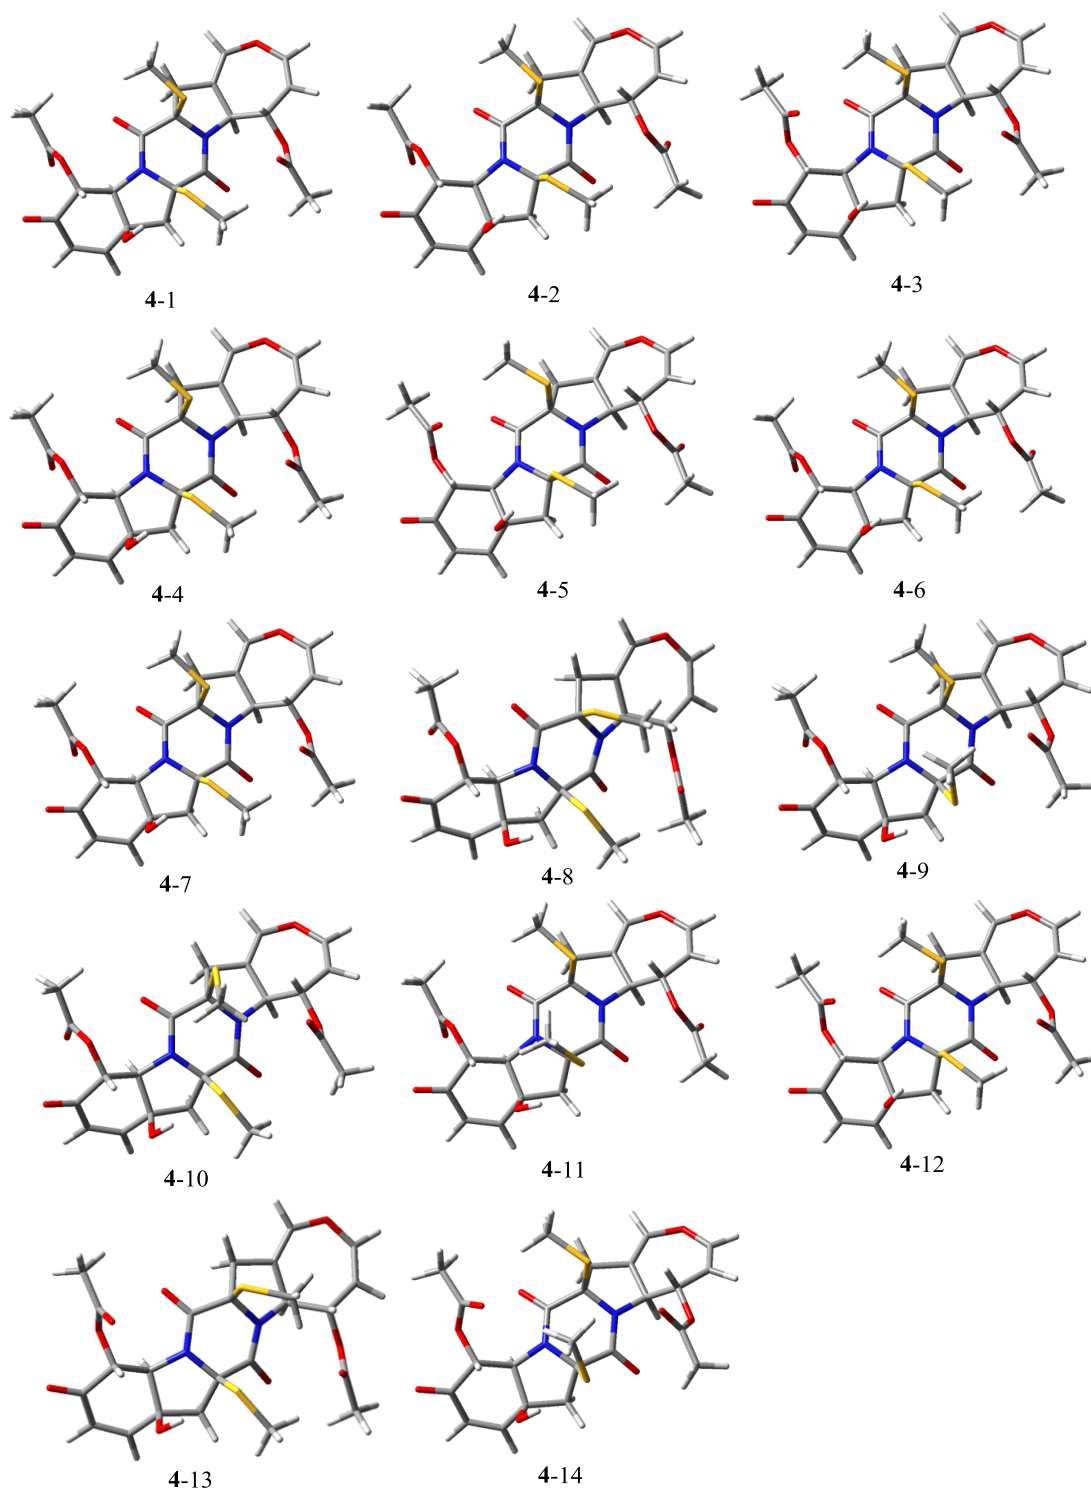

**Figure S60** Conformations of low-energy conformers of structure **5** in MeOH

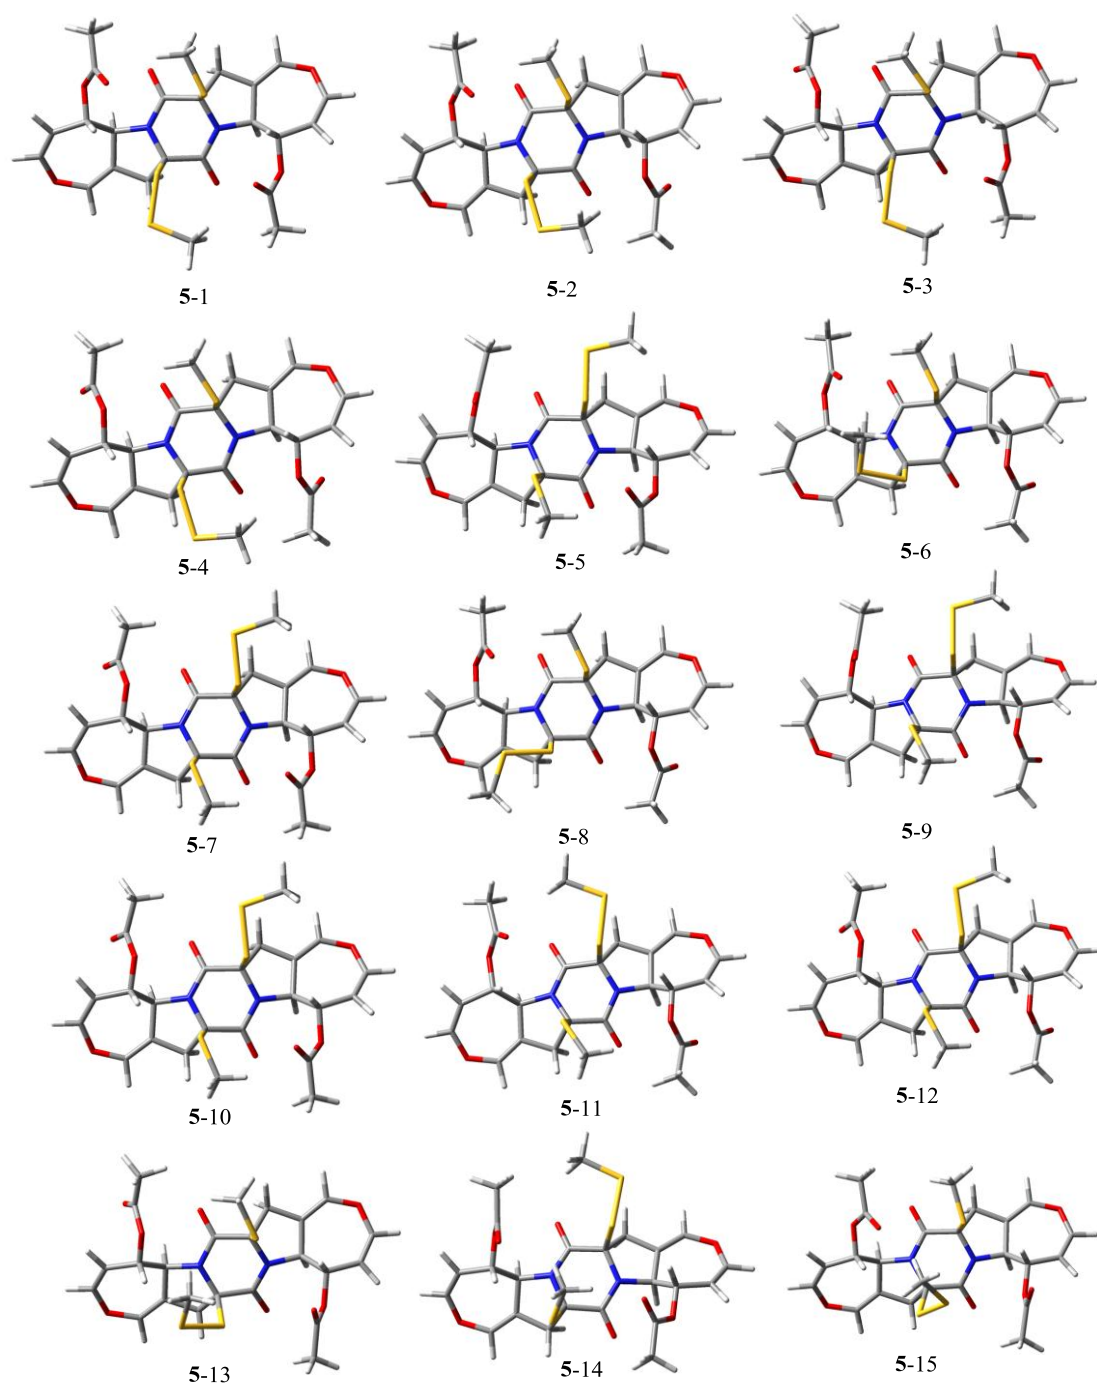

**Figure S61** Conformations of low-energy conformers of structure **6** in MeOH

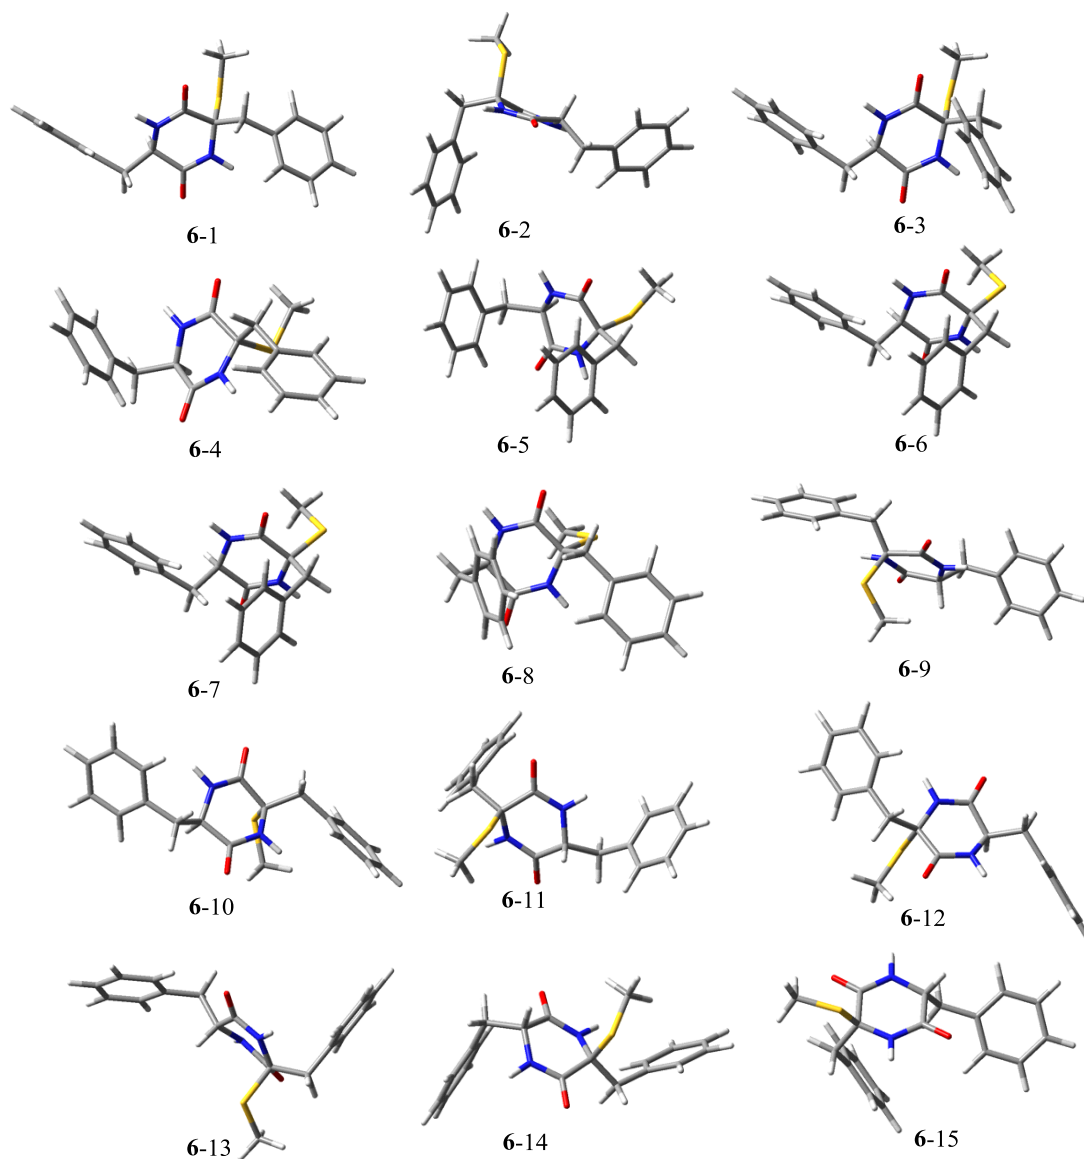

**Figure S62** CD spectrum of **3** in CH<sub>3</sub>CN

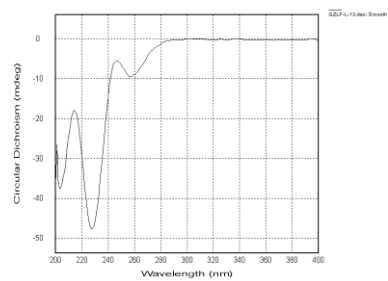

**3**

**Figure S63** CD spectra of **1**, **2**, **4-6** in MeOH

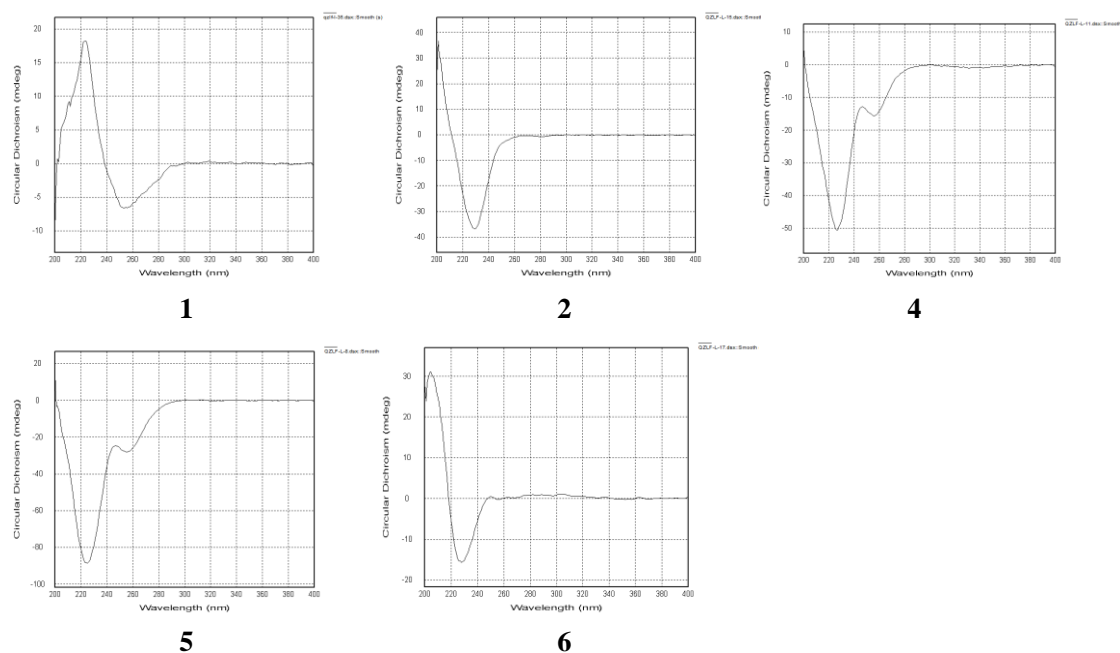

**Figure S64** Key HMBC and COSY correlations of compounds **5-6**

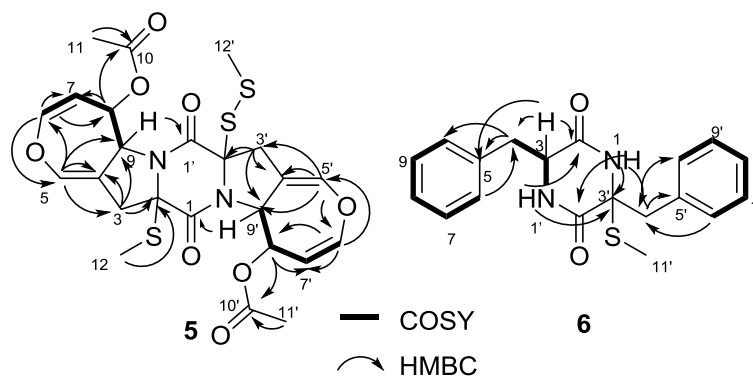

**Figure S65** Key NOESY correlations of compounds **5-6**

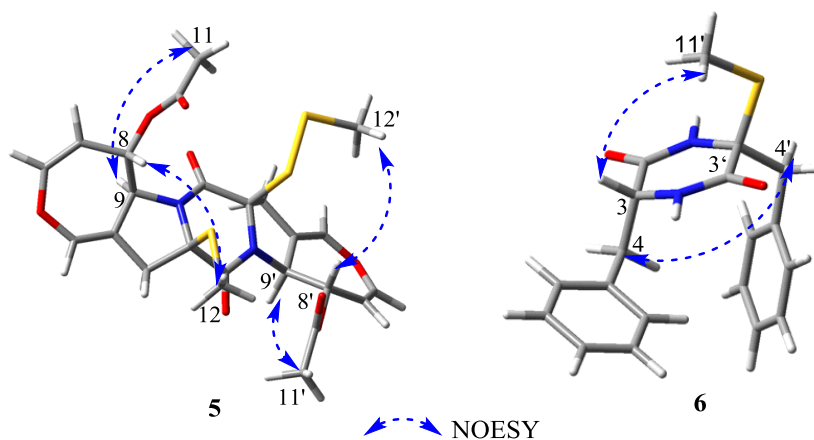

**Figure S66** The proposed biosynthetic pathway for compound **1**

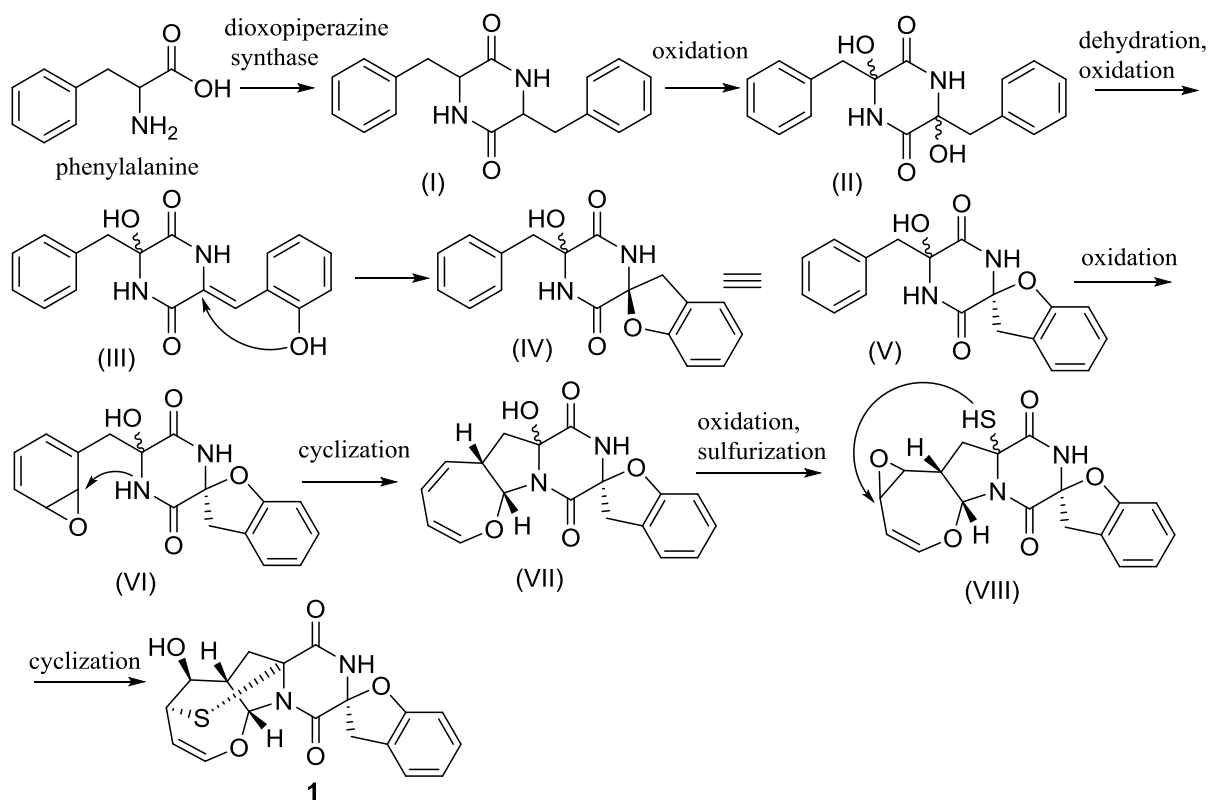

Supplement: s1 [file s1]
